# Supplementary material for: Novel Substrates for Kinases Involved in the Biosynthesis of Inositol Pyrophosphates and Their Enhancement of ATPase Activity of a Kinase
Source: MDPI journal article supplement (doi:10.3390/molecules26123601), 2021-06-11
Supplement: s1 [file s1]

## Supplementary Data

# Novel Substrates for Kinases Involved in the Biosynthesis of Inositol Pyrophosphates and Their Enhancement of ATPase Activity of a Kinase

Raja Mohanrao <sup>1</sup>, Ruth Manorama <sup>2</sup>, Shubhra Ganguli <sup>2,3</sup>, Mithun C. Madhusudhanan <sup>1</sup>, Rashna Bhandari <sup>2,\*</sup> and Kana M. Sureshan <sup>1,\*</sup>

<sup>1</sup> School of Chemistry, Indian Institute of Science Education and Research Thiruvananthapuram, Kerala 695551, India; rajamohanrao1@gmail.com (R.M.), mithun716@iisertvm.ac.in (M.C.M.)

<sup>2</sup> Laboratory of Cell Signalling, Centre for DNA Fingerprinting and Diagnostics, Hyderabad 500039, India; manorama@cdfd.org.in (R.M.), shubhraganguli@cdfd.org.in (S.G.)

<sup>3</sup> Manipal Academy of Higher Education, Manipal, 576104, India.

\* Correspondence: kms@iisertvm.ac.in (K.M.S.); rashna@cdfd.org.in (R.B.)

| S. No | Table of contents                                       | Page No. |
|-------|---------------------------------------------------------|----------|
| 1     | PAGE analysis of PPIPn products                         | S2       |
| 2     | Calibration of SAX HPLC for resolution of IPs and PPIPs | S3       |
| 3     | Molecular Docking                                       | S4-S13   |
| 4     | Effect of inhibitors on ATPase activity of IP kinases   | S14      |
| 5     | Spectral data                                           | S15-S50  |
| 6     | References                                              | S51      |

## 1. PAGE analysis of PPIPn products

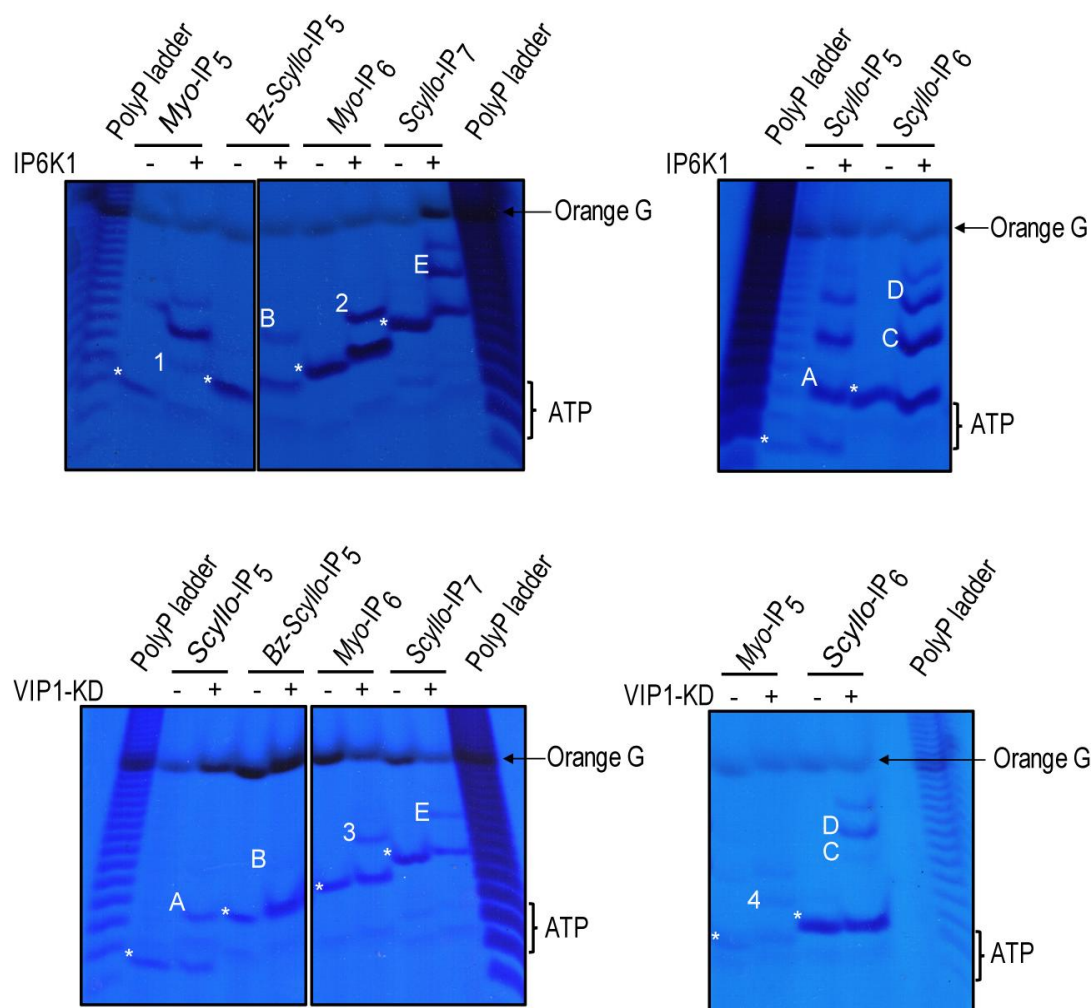

**Figure S1.** PAGE analysis followed by toluidine blue staining to detect PPIPn products formed by the catalysis of IP6K1 (top) and VIP1-KD (bottom) on various IPn substrates. Reactions were performed as described in Section 3.3. The unreacted IPn substrate (marked by an asterisk\*) is loaded to the left of each post-reaction mixture. The migration of Orange G dye and inorganic polyphosphate (polyP) ladder were used as electrophoresis standards. The position of ATP, which has been shown to co-migrate with *myo*-IP<sub>5</sub> [1], is indicated. We observed that *scyllo*-IP<sub>5</sub> migrates faster than ATP. Based on the well characterized ability of IP6K1 and VIP1 to catalyse the addition of a  $\beta$ -phosphate on the 5- and 1-position on *myo*-inositol, the products of *myo*-IP<sub>5</sub> and *myo*-IP<sub>6</sub> marked on the gel are: 1. 5PP-*myo*-IP<sub>4</sub>, 2. 5PP-*myo*-IP<sub>5</sub>, 3. 1PP-*myo*-IP<sub>5</sub>, and 4. 1PP-*myo*-IP<sub>4</sub>. Each consecutive band of IPn or PPIPn in the same lane differs by the presence of a single phosphate moiety [1]. This, combined with the demonstrated ability of IP6K1 and VIP1 to catalyse the addition of a  $\beta$ -phosphate onto an  $\alpha$ -phosphate on the inositol ring, allows us to propose the structures of the *scyllo*-PPIPn products as follows: A. PP-*scyllo*-IP<sub>4</sub>, B. PP-Bz-*scyllo*-IP<sub>4</sub>, C. PP-*scyllo*-IP<sub>5</sub>, D. [PP]<sub>2</sub>-*scyllo*-IP<sub>4</sub> / PPP-*scyllo*-IP<sub>5</sub>, E. [PP]<sub>2</sub>-*scyllo*-IP<sub>4</sub> / PPP-*scyllo*-IP<sub>5</sub>. This annotation corresponds to the labelling of peaks in the chromatograms shown in Figure 2. The scanned gels were subjected to 'brightness and contrast' adjustment to improve visualisation. A narrow gap marks the removal of a lane from a single gel for better visualisation.

## 2. Calibration of SAX HPLC for resolution of IPs and PPIPs

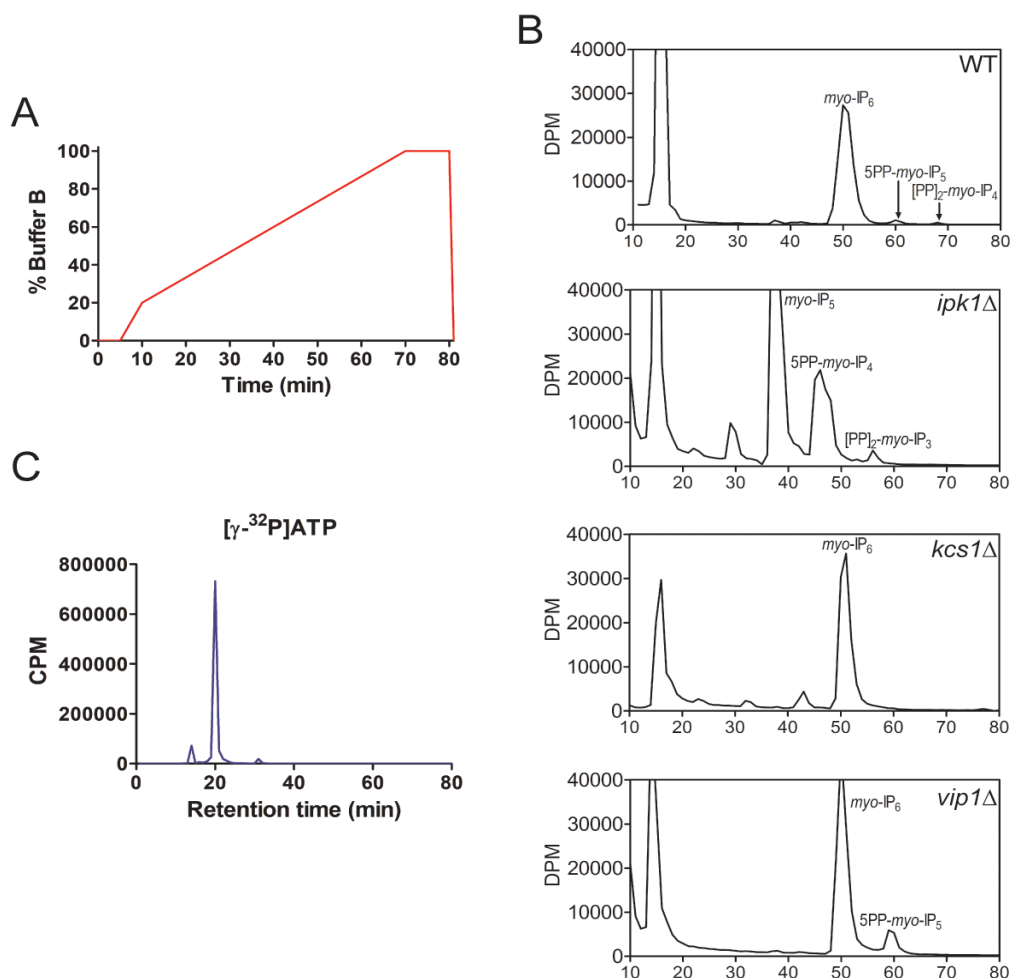

**Figure S2. (A)** Graphical representation of SAX HPLC elution gradient profile described in Section 3.3. **(B)** SAX-HPLC analysis of extracts from [<sup>3</sup>H]inositol labeled *S. cerevisiae* BY4741 wild type (WT) strain, and deletion mutants lacking the enzymes (i) IPK1 responsible for the conversion of IP<sub>5</sub> to IP<sub>6</sub> (*ipk1Δ*); (ii) KCS1, the *S. cerevisiae* IP<sub>6</sub> kinase responsible for the conversion of IP<sub>6</sub> to 5PP-IP<sub>5</sub> (*kcs1Δ*); and (iii) VIP1 (*vip1Δ*). The IPs in the elution profiles are annotated as reported earlier [2,3]. Peaks corresponding to *myo*-IP<sub>6</sub>, 5PP-*myo*-IP<sub>5</sub> and 1,5[PP]<sub>2</sub>-*myo*-IP<sub>4</sub> are marked in the WT strain. In *ipk1Δ* yeast, peaks corresponding to *myo*-IP<sub>6</sub> and its PPIP products disappeared, and *myo*-IP<sub>5</sub> and PP-*myo*-IP<sub>4</sub> peaks became abundant. 5PP-*myo*-IP<sub>5</sub> and 1,5[PP]<sub>2</sub>-*myo*-IP<sub>4</sub> are absent in *kcs1Δ* with a corresponding increase in the *myo*-IP<sub>6</sub> peak. In *vip1Δ* yeast, there was an increase in *myo*-IP<sub>6</sub> and 5PP-*myo*-IP<sub>5</sub>, with the disappearance of 1,5[PP]<sub>2</sub>-*myo*-IP<sub>4</sub>. These elution profiles of well characterised yeast strains were used to mark the retention times of the PPIPn products of *myo*-IP<sub>5</sub>, *myo*-IP<sub>6</sub> shown in Figure 2. We observe lower retention times for *scyllo*-PPIPs compared with their *myo*-counterparts (see Figure 2). **(C)** Chromatogram showing elution profile of radiolabeled ATP in the negative control reaction containing *myo*-IP<sub>6</sub> and [γ<sup>32</sup>P]ATP incubated in the presence of BSA instead of enzyme.

### 3. Molecular Docking

Molecular docking studies were carried out by treating *myo*-IP6 and *scyllo*-IP6 as ligands using CCDC GOLD package using GOLDScore as the scoring function [4]. The X-Ray crystal structure of IP6 from the PDB files of PPIP2K and *Eh*IP6KA complex (PDB code: 3T9C, 4O4F) was used as the initial input, which was modified to *scyllo*-IP6 using Gaussview 6 [5]. Both *myo* and *scyllo* IP6 structures were then energy minimised using MM94 forcefield in Avogadro [6] and thus further utilised for docking experiments. All except three water molecules were removed from both peptide domain, along with the removal of AMPPNP (PPIP5K2) and ATP and PO4<sup>3-</sup> (*Eh*IP6KA) and Mg<sup>2+</sup> ions. In GOLD, the binding site was defined as a sphere of 6 Å radius and water molecules were included in the docking protocol (30,35,462 for PPIP5K2 and 587,620,667 for *Eh*IP6KA) these water molecules were identified near the axial site of IP6 and was toggled on and off, thus necessitating to evaluate their possible role in forming Water Bridges at the axial position. Each ligand was docked 100 times (100 GA runs) using genetic algorithm settings for very flexible ligands. The results of GOLDScore function were observed to be unusually high but such an observation is not new and the probable explanation being the tendency of GOLDScore to reward heavily for hydrogen bonding involving charged phosphates, [7] even though these scoring functions are optimised for accurate pose prediction, they do might have an influence w.r.t. binding affinities of the peptide ligand system. The fitness scores for GOLDScore is given in Figure S2. The binding modes of *myo*-IP6 and *scyllo*-IP6 with the highest docking score against the above-mentioned kinases were obtained and their interactions visualised using Protein Ligand Profiler (PLIP) [8]. Tables S1-S4 give further details on the possible interactions observed at the protein ligand interface.

**Table S1.** Results of Docking *myo*-IP6 on PPIP5K2- GOLDScore results

#### Hydrogen Bonds

| Index | Residue | AA  | Distance<br>H-A | Distance<br>D-A | Donor<br>Angle | Donor<br>Atom | Acceptor<br>Atom |
|-------|---------|-----|-----------------|-----------------|----------------|---------------|------------------|
| 1     | 250A    | TYR | 2.47            | 3.38            | 151.91         | 3481<br>[O3]  | 5421<br>[O3]     |
| 2     | 250A    | TYR | 2.73            | 3.38            | 125.44         | 5421<br>[O3]  | 3481<br>[O3]     |
| 3     | 250A    | TYR | 2.64            | 3.35            | 129.62         | 5400<br>[O3]  | 3481<br>[O3]     |
| 4     | 250A    | TYR | 3.03            | 3.66            | 123.76         | 5399<br>[O3]  | 3481<br>[O3]     |
| 5     | 262A    | ARG | 2.95            | 3.61            | 123.43         | 3657<br>[Ng+] | 5412<br>[O3]     |
| 6     | 262A    | ARG | 2.46            | 2.89            | 104.56         | 3654<br>[N3]  | 5406<br>[O3]     |

| Index | Residue | AA  | Distance<br>H-A | Distance<br>D-A | Donor<br>Angle | Donor<br>Atom | Acceptor<br>Atom |
|-------|---------|-----|-----------------|-----------------|----------------|---------------|------------------|
| 7     | 281A    | ARG | 2.61            | 3.14            | 111.78         | 3974<br>[N3]  | 5399<br>[O3]     |
| 8     | 281A    | ARG | 3.00            | 3.67            | 124.73         | 3972<br>[N3]  | 5397<br>[O2]     |
| 9     | 321A    | ASP | 2.39            | 2.73            | 101.60         | 4642<br>[O3]  | 5415<br>[O3]     |
| 10    | 323A    | ASN | 3.06            | 3.43            | 102.65         | 4672<br>[Nam] | 5416<br>[O3]     |
| 11    | 323A    | ASN | 2.94            | 3.58            | 124.81         | 5420<br>[O3]  | 4671<br>[O2]     |
| 12    | 326A    | SER | 3.26            | 3.97            | 131.26         | 5425<br>[O3]  | 4717<br>[O3]     |
| 13    | 326A    | SER | 2.30            | 3.28            | 171.47         | 4717<br>[O3]  | 5424<br>[O2]     |

\*Distance in angstrom (Å), angles in degrees

#### Water Bridges

| Index | Residue | AA  | Dist.<br>A-W | Dist.<br>D-W | Donor<br>Angle | Water<br>Angle | Donor<br>Atom | Acceptor<br>Atom | Water<br>Atom |
|-------|---------|-----|--------------|--------------|----------------|----------------|---------------|------------------|---------------|
| 1     | 54A     | LYS | 2.74         | 4.05         | 103.98         | 88.39          | 199<br>[N3+]  | 5425<br>[O3]     | 5444          |
| 2     | 54A     | LYS | 4.04         | 4.05         | 112.41         | 137.19         | 199<br>[N3+]  | 5426<br>[O3]     | 5444          |

\*Distance in angstrom (Å), angles in degrees

#### Salt Bridges

| Index | Residue | AA  | Distance | Ligand<br>Group | Ligand Atoms                          |
|-------|---------|-----|----------|-----------------|---------------------------------------|
| 1     | 54A     | LYS | 4.62     | Phosphate       | 5423, 5423, 5422, 5425,<br>5426, 5424 |

| Index | Residue | AA  | Distance | Ligand Group | Ligand Atoms                       |
|-------|---------|-----|----------|--------------|------------------------------------|
| 2     | 194A    | HIS | 4.65     | Phosphate    | 5413, 5413, 5412, 5414, 5415, 5416 |
| 3     | 213A    | ARG | 4.20     | Phosphate    | 5413, 5413, 5412, 5414, 5415, 5416 |
| 4     | 213A    | ARG | 4.48     | Phosphate    | 5408, 5408, 5407, 5409, 5410, 5411 |
| 5     | 214A    | LYS | 3.36     | Phosphate    | 5403, 5403, 5402, 5404, 5405, 5406 |
| 6     | 248A    | LYS | 4.58     | Phosphate    | 5413, 5413, 5412, 5414, 5415, 5416 |
| 7     | 248A    | LYS | 3.66     | Phosphate    | 5418, 5418, 5417, 5419, 5420, 5421 |
| 8     | 248A    | LYS | 5.15     | Phosphate    | 5398, 5398, 5397, 5401, 5399, 5400 |
| 9     | 262A    | ARG | 4.91     | Phosphate    | 5408, 5408, 5407, 5409, 5410, 5411 |
| 10    | 262A    | ARG | 5.31     | Phosphate    | 5398, 5398, 5397, 5401, 5399, 5400 |
| 11    | 329A    | LYS | 3.37     | Phosphate    | 5423, 5423, 5422, 5425, 5426, 5424 |
| 12    | 329A    | LYS | 5.22     | Phosphate    | 5418, 5418, 5417, 5419, 5420, 5421 |
| 13    | 329A    | LYS | 3.58     | Phosphate    | 5398, 5398, 5397, 5401, 5399, 5400 |

\*Distance in angstrom (Å), angles in degrees

**Table S2.** Results of Docking *scylla*-IP6 on PPIP5K2- GOLDScore  
results Hydrogen Bonds

| Index | Residue | AA  | Distance<br>H-A | Distance<br>D-A | Donor<br>Angle | Donor<br>Atom | Acceptor<br>Atom |
|-------|---------|-----|-----------------|-----------------|----------------|---------------|------------------|
| 1     | 213A    | ARG | 3.28            | 3.95            | 125.23         | 2850<br>[Ng+] | 5421<br>[O3]     |
| 2     | 214A    | LYS | 1.74            | 2.63            | 142.89         | 2864<br>[Nam] | 5411<br>[O3]     |
| 3     | 262A    | ARG | 3.51            | 3.93            | 106.86         | 3657<br>[Ng+] | 5415<br>[O3]     |
| 4     | 262A    | ARG | 2.69            | 3.60            | 149.59         | 3654<br>[N3]  | 5428<br>[O3]     |
| 5     | 262A    | ARG | 2.44            | 3.45            | 170.69         | 3655<br>[Ng+] | 5409<br>[O2]     |
| 6     | 262A    | ARG | 2.87            | 3.68            | 153.57         | 3656<br>[N3]  | 5430<br>[O2]     |
| 7     | 262A    | ARG | 1.85            | 2.81            | 174.20         | 5431<br>[O3]  | 3656<br>[N3]     |
| 8     | 281A    | ARG | 3.02            | 4.02            | 168.84         | 3974<br>[N3]  | 5397<br>[O3]     |
| 9     | 281A    | ARG | 2.79            | 3.60            | 137.24         | 3972<br>[N3]  | 5431<br>[O3]     |
| 10    | 281A    | ARG | 2.10            | 2.90            | 138.91         | 5400<br>[O3]  | 3974<br>[N3]     |
| 11    | 321A    | ASP | 2.85            | 3.29            | 109.97         | 4642<br>[O3]  | 5415<br>[O3]     |
| 12    | 323A    | ASN | 2.94            | 3.44            | 111.57         | 4672<br>[Nam] | 5414<br>[O2]     |
| 13    | 323A    | ASN | 2.43            | 3.31            | 150.35         | 5415<br>[O3]  | 4671<br>[O2]     |
| 14    | 326A    | SER | 1.86            | 2.83            | 164.96         | 4717<br>[O3]  | 5419<br>[O2]     |

\*Distance in angstrom (Å), angles in degrees

#### Salt Bridges

| Index | Residue | AA  | Distance | Ligand Group | Ligand Atoms                       |
|-------|---------|-----|----------|--------------|------------------------------------|
| 1     | 194A    | HIS | 4.68     | Phosphate    | 5413, 5413, 5412, 5414, 5415, 5416 |
| 2     | 213A    | ARG | 4.02     | Phosphate    | 5413, 5413, 5412, 5414, 5415, 5416 |
| 3     | 213A    | ARG | 4.53     | Phosphate    | 5408, 5408, 5407, 5409, 5410, 5411 |
| 4     | 214A    | LYS | 4.04     | Phosphate    | 5398, 5398, 5397, 5401, 5399, 5400 |
| 5     | 214A    | LYS | 4.31     | Phosphate    | 5403, 5403, 5402, 5404, 5405, 5406 |
| 6     | 248A    | LYS | 4.04     | Phosphate    | 5418, 5418, 5417, 5419, 5420, 5421 |
| 7     | 248A    | LYS | 4.50     | Phosphate    | 5413, 5413, 5412, 5414, 5415, 5416 |
| 8     | 248A    | LYS | 5.09     | Phosphate    | 5429, 5429, 5428, 5430, 5431, 5432 |
| 9     | 262A    | ARG | 5.47     | Phosphate    | 5398, 5398, 5397, 5401, 5399, 5400 |
| 10    | 262A    | ARG | 4.26     | Phosphate    | 5403, 5403, 5402, 5404, 5405, 5406 |
| 11    | 329A    | LYS | 4.99     | Phosphate    | 5418, 5418, 5417, 5419, 5420, 5421 |
| 12    | 329A    | LYS | 3.34     | Phosphate    | 5429, 5429, 5428, 5430, 5431, 5432 |

\*Distance in angstrom (Å), angles in degrees



**Table S3.** Results of Docking *myo*-IP6 on *Eh*IP6KA- GOLDScore

results Hydrogen Bonds

| Index | Residue | AA  | Distance<br>H-A | Distance<br>D-A | Donor<br>Angle | Donor<br>Atom | Acceptor<br>Atom |
|-------|---------|-----|-----------------|-----------------|----------------|---------------|------------------|
| 1     | 23A     | GLY | 2.35            | 3.37            | 175.70         | 1 [N3]        | 4190<br>[O2]     |
| 2     | 106A    | THR | 3.11            | 3.91            | 140.12         | 4171<br>[O3]  | 1375<br>[O3]     |
| 3     | 106A    | THR | 3.56            | 4.02            | 110.34         | 1375<br>[O3]  | 4170<br>[O3]     |
| 4     | 106A    | THR | 2.42            | 3.27            | 145.55         | 4170<br>[O3]  | 1373<br>[O2]     |
| 5     | 134A    | ARG | 3.16            | 3.86            | 127.17         | 1814<br>[Ng+] | 4168<br>[O2]     |
| 6     | 136A    | SER | 2.23            | 3.16            | 154.16         | 1853<br>[O3]  | 4181<br>[O3]     |
| 7     | 136A    | SER | 2.27            | 3.16            | 151.54         | 4181<br>[O3]  | 1853<br>[O3]     |
| 8     | 136A    | SER | 2.87            | 3.50            | 123.29         | 4187<br>[O3]  | 1853<br>[O3]     |
| 9     | 152A    | ARG | 3.22            | 3.60            | 104.06         | 2109<br>[Ng+] | 4178<br>[O3]     |
| 10    | 207A    | SER | 2.36            | 3.34            | 169.24         | 3100<br>[O3]  | 4170<br>[O3]     |

\*Distance in angstrom (Å), angles in degrees

Salt Bridges

| Index | Residue | AA  | Distance | Ligand<br>Group | Ligand Atoms                          |
|-------|---------|-----|----------|-----------------|---------------------------------------|
| 1     | 101A    | LYS | 3.50     | Phosphate       | 4179, 4179, 4178, 4180,<br>4181, 4182 |

| Index | Residue | AA  | Distance | Ligand Group | Ligand Atoms                       |
|-------|---------|-----|----------|--------------|------------------------------------|
| 2     | 101A    | LYS | 3.70     | Phosphate    | 4169, 4169, 4168, 4171, 4172, 4170 |
| 3     | 101A    | LYS | 4.42     | Phosphate    | 4184, 4184, 4183, 4187, 4185, 4186 |
| 4     | 115A    | LYS | 4.43     | Phosphate    | 4194, 4194, 4193, 4195, 4196, 4197 |
| 5     | 118A    | LYS | 3.84     | Phosphate    | 4174, 4174, 4173, 4175, 4176, 4177 |
| 6     | 118A    | LYS | 4.52     | Phosphate    | 4194, 4194, 4193, 4195, 4196, 4197 |
| 7     | 119A    | ARG | 4.71     | Phosphate    | 4174, 4174, 4173, 4175, 4176, 4177 |
| 8     | 119A    | ARG | 3.62     | Phosphate    | 4169, 4169, 4168, 4171, 4172, 4170 |
| 9     | 119A    | ARG | 4.18     | Phosphate    | 4194, 4194, 4193, 4195, 4196, 4197 |
| 10    | 134A    | ARG | 4.14     | Phosphate    | 4179, 4179, 4178, 4180, 4181, 4182 |
| 11    | 152A    | ARG | 3.88     | Phosphate    | 4184, 4184, 4183, 4187, 4185, 4186 |

\*Distance in angstrom (Å), angles in degrees

**Table S4.** Results of Docking *scyII*-IP6 on EhIP6KA- GOLDScore  
results Hydrogen Bonds

| Index | Residue | AA  | Distance<br>H-A | Distance<br>D-A | Donor<br>Angle | Donor<br>Atom | Acceptor<br>Atom |
|-------|---------|-----|-----------------|-----------------|----------------|---------------|------------------|
| 1     | 106A    | THR | 3.24            | 3.65            | 107.45         | 4187<br>[O3]  | 1375<br>[O3]     |
| 2     | 134A    | ARG | 2.71            | 3.41            | 125.76         | 1814<br>[Ng+] | 4187<br>[O3]     |
| 3     | 136A    | SER | 2.01            | 2.98            | 162.72         | 1853<br>[O3]  | 4202<br>[O3]     |
| 4     | 136A    | SER | 2.02            | 2.98            | 168.67         | 4202<br>[O3]  | 1853<br>[O3]     |
| 5     | 152A    | ARG | 3.57            | 4.07            | 114.77         | 4192<br>[O3]  | 2105<br>[O2]     |
| 6     | 152A    | ARG | 3.32            | 3.68            | 102.71         | 2109<br>[Ng+] | 4199<br>[O3]     |

\*Distance in angstrom (Å), angles in degrees

#### Salt Bridges

| Index | Residue | AA  | Distance | Ligand<br>Group | Ligand Atoms                          |
|-------|---------|-----|----------|-----------------|---------------------------------------|
| 1     | 101A    | LYS | 3.81     | Phosphate       | 4200, 4200, 4199, 4203,<br>4201, 4202 |
| 2     | 101A    | LYS | 4.11     | Phosphate       | 4169, 4169, 4168, 4171,<br>4172, 4170 |
| 3     | 115A    | LYS | 4.70     | Phosphate       | 4179, 4179, 4178, 4180,<br>4181, 4182 |
| 4     | 118A    | LYS | 5.02     | Phosphate       | 4189, 4189, 4188, 4190,<br>4191, 4192 |
| 5     | 118A    | LYS | 4.40     | Phosphate       | 4184, 4184, 4183, 4187,<br>4185, 4186 |

| Index | Residue | AA  | Distance | Ligand Group | Ligand Atoms                       |
|-------|---------|-----|----------|--------------|------------------------------------|
| 6     | 118A    | LYS | 3.94     | Phosphate    | 4179, 4179, 4178, 4180, 4181, 4182 |
| 7     | 119A    | ARG | 4.00     | Phosphate    | 4184, 4184, 4183, 4187, 4185, 4186 |
| 8     | 119A    | ARG | 3.81     | Phosphate    | 4179, 4179, 4178, 4180, 4181, 4182 |
| 9     | 134A    | ARG | 4.10     | Phosphate    | 4200, 4200, 4199, 4203, 4201, 4202 |
| 10    | 152A    | ARG | 4.11     | Phosphate    | 4169, 4169, 4168, 4171, 4172, 4170 |
| 11    | 152A    | ARG | 4.32     | Phosphate    | 4174, 4174, 4173, 4175, 4176, 4177 |

\*Distance in angstrom (Å), angles in degrees

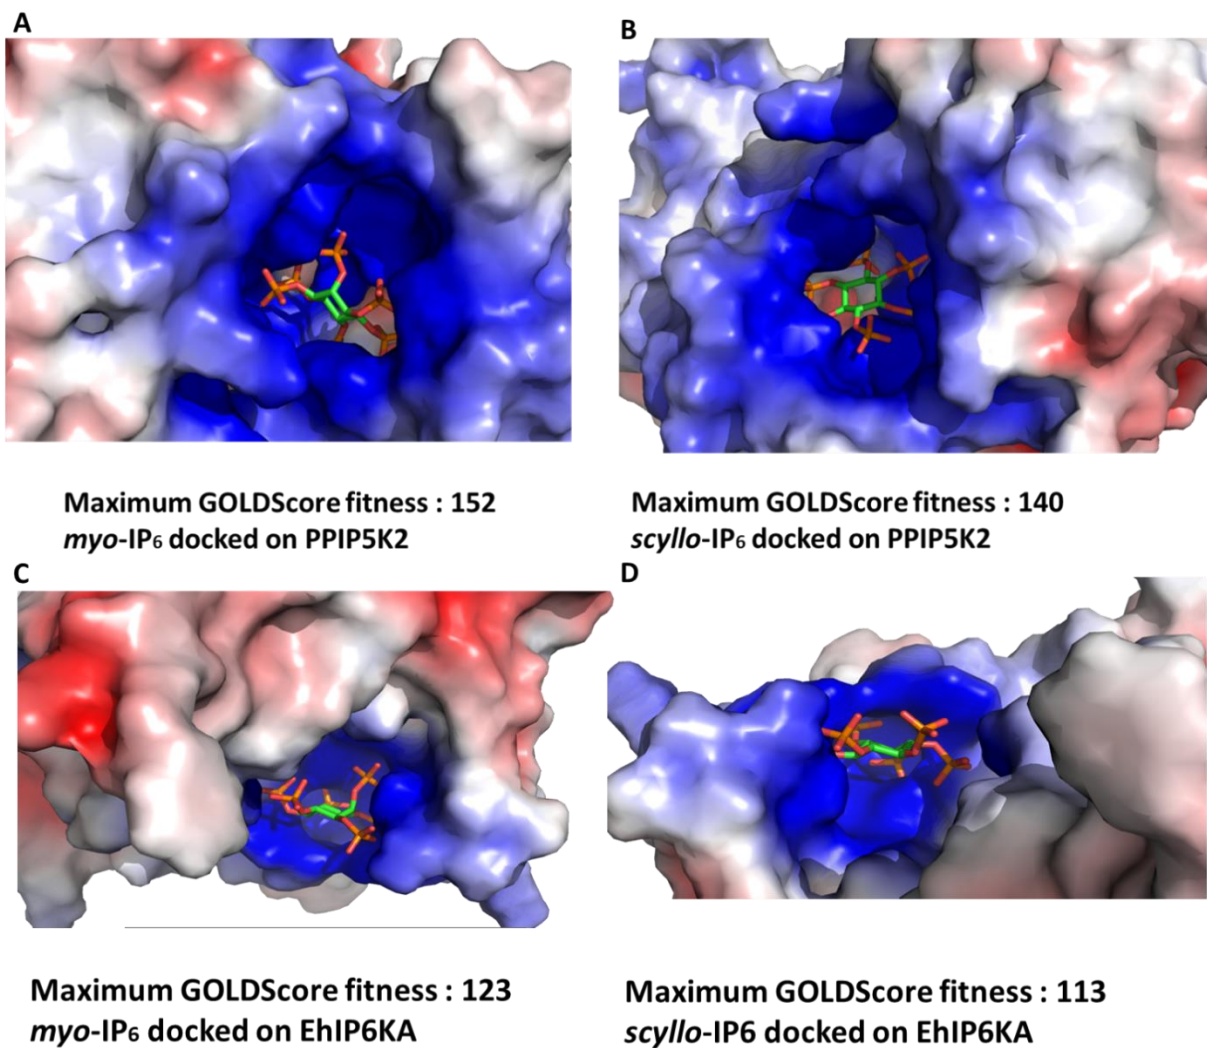

**Figure S3.** The highest scoring poses of *myo*- and *scyllo*-IP<sub>6</sub> docked at the binding site of PPIP5K2 and EhIP6KA. The protein is shown as a solvent-accessible surface, with the electrostatic potential maps being generated using APBS Tools within PyMOL.

#### 4. Effect of inhibitors on ATPase activity of IP kinases

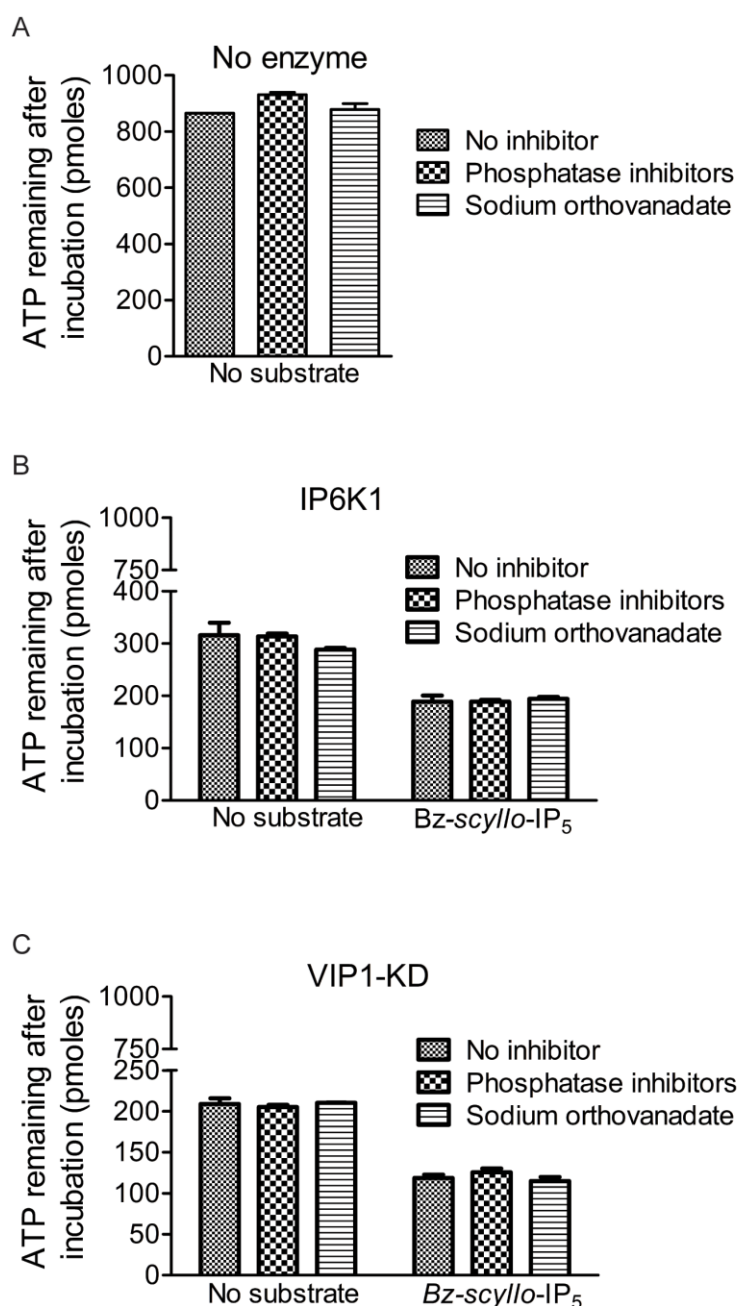

**Figure S4: Effect of inhibitors on ATPase activity of IP kinases.** Consumption of ATP by 6xHis-mIP6K1 and GST-VIP1-KD was monitored by a luminescence-based assay to measure ATP in the reaction mix after incubation with enzyme. (A) There was no effect of a phosphatase inhibitor cocktail or the generic ATPase inhibitor sodium orthovanadate on the detection of ATP by the assay. (B, C) ATP was consumed in the presence of IP6K1 (compare B with A) and VIP1-KD (compare C with A), and in both cases, ATP consumption was increased in the presence of Bz-scyllol-IP<sub>5</sub> (also see Figure 5). The presence of phosphatase inhibitors or sodium orthovanadate had no effect on basal or Bz-scyllol-IP<sub>5</sub>-stimulated ATP consumption by IP6K1 or VIP1, indicating the absence of any contaminating phosphatase or ATPase in the purified enzyme preparations. The data show mean  $\pm$  range from two independent experiments.

## 5. Spectral data

### $^1\text{H}$ NMR of compound 4

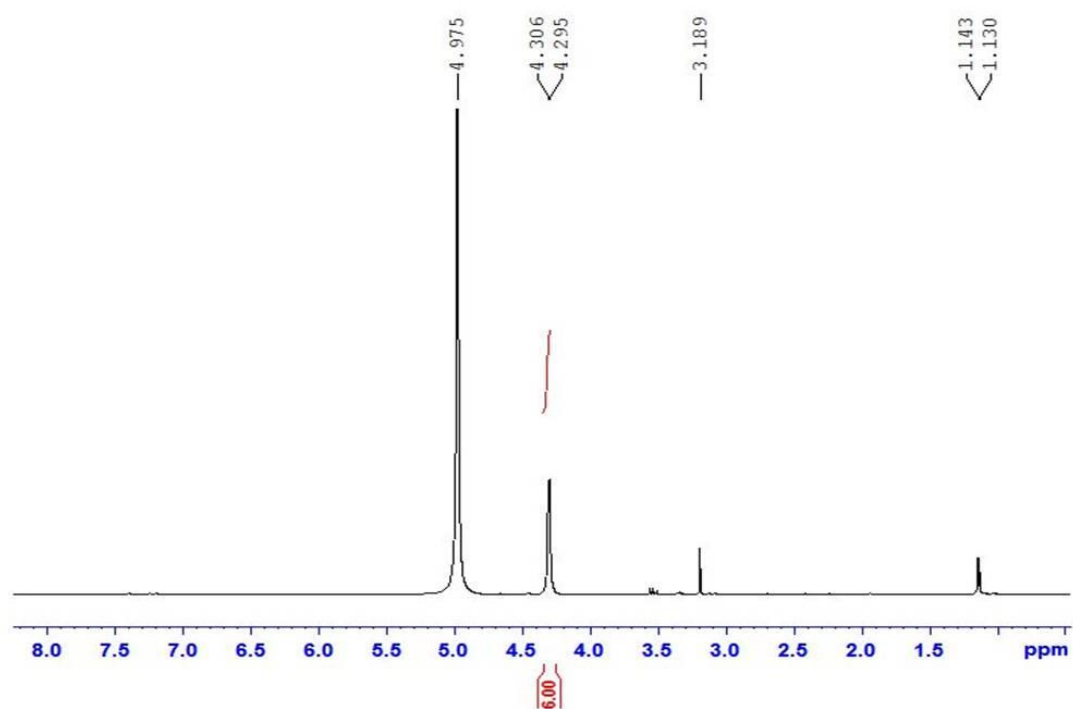

### $^{31}\text{P}$ NMR of compound 4

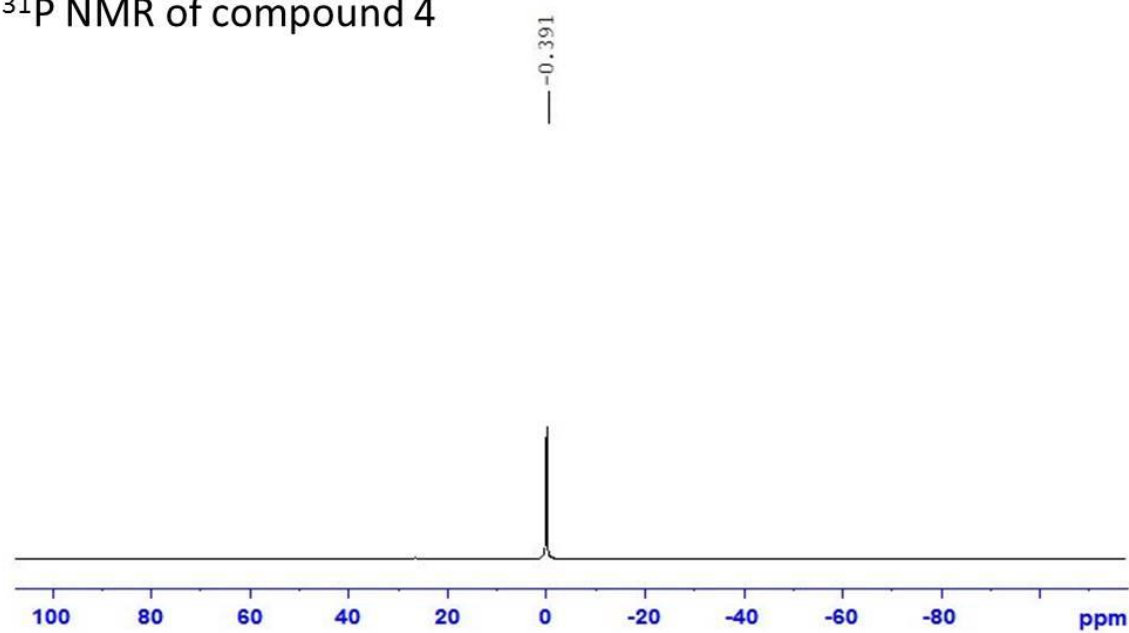

# <sup>1</sup>H NMR of compound 5

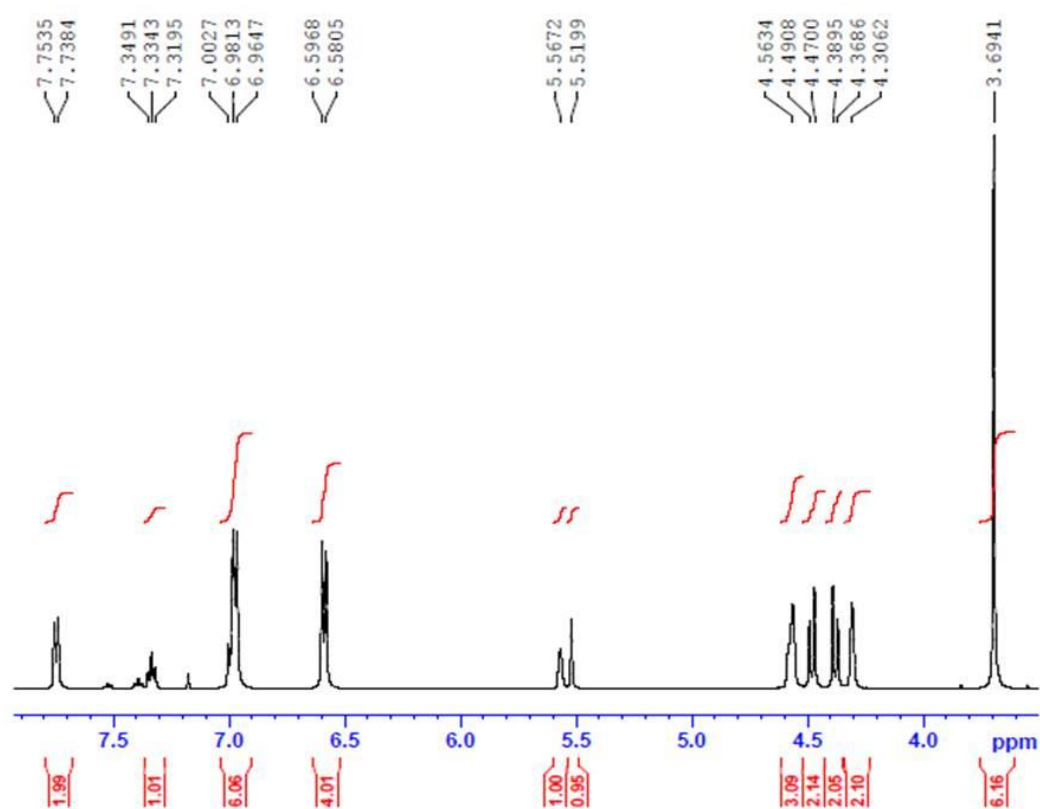

## Cosy of compound 5

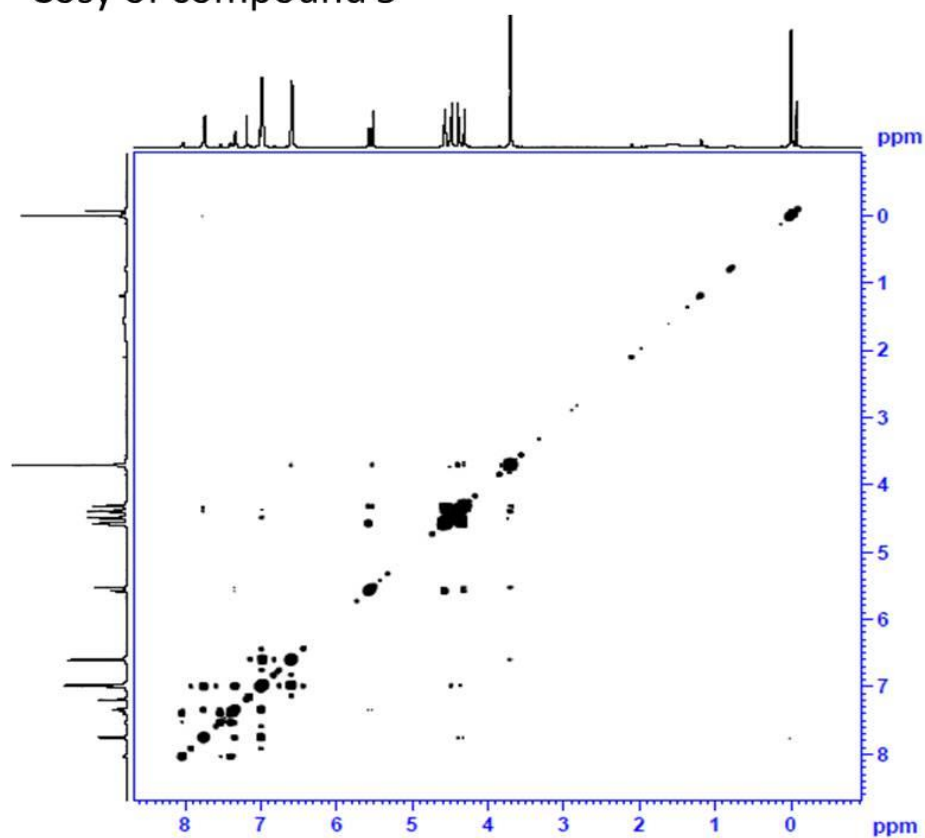



# DEPT of compound 5

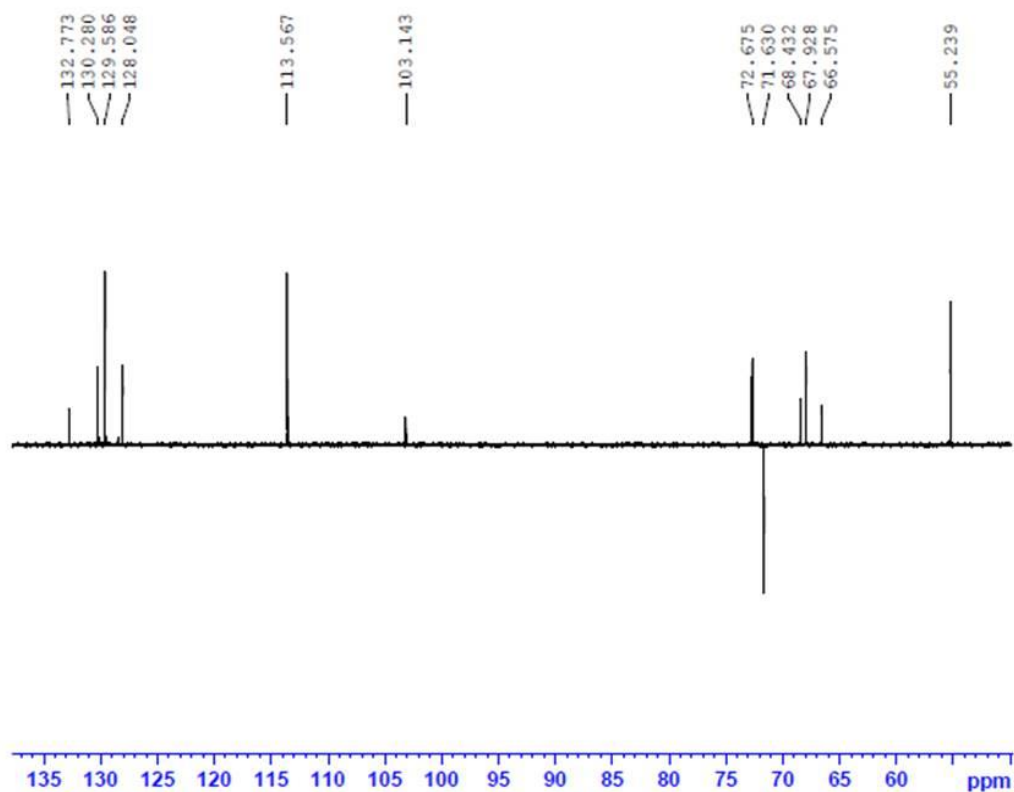

## <sup>13</sup>C of compound 5

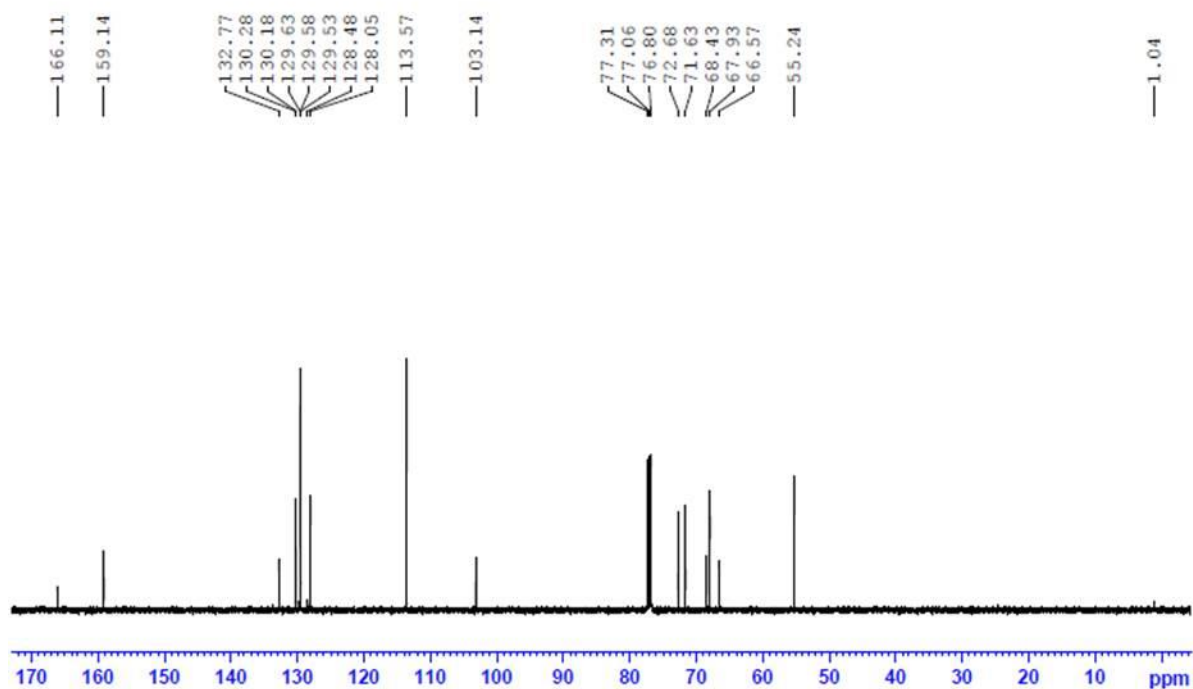

HMQC of compound 5

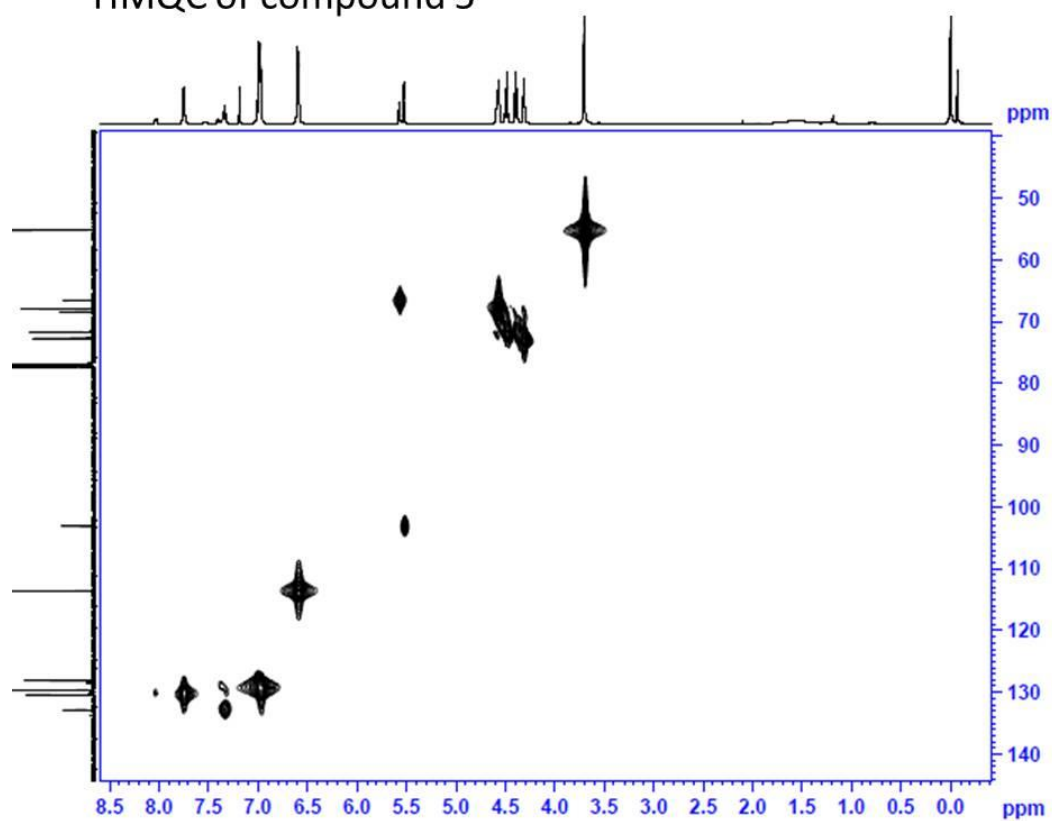

$^1\text{H}$  NMR of compound 6

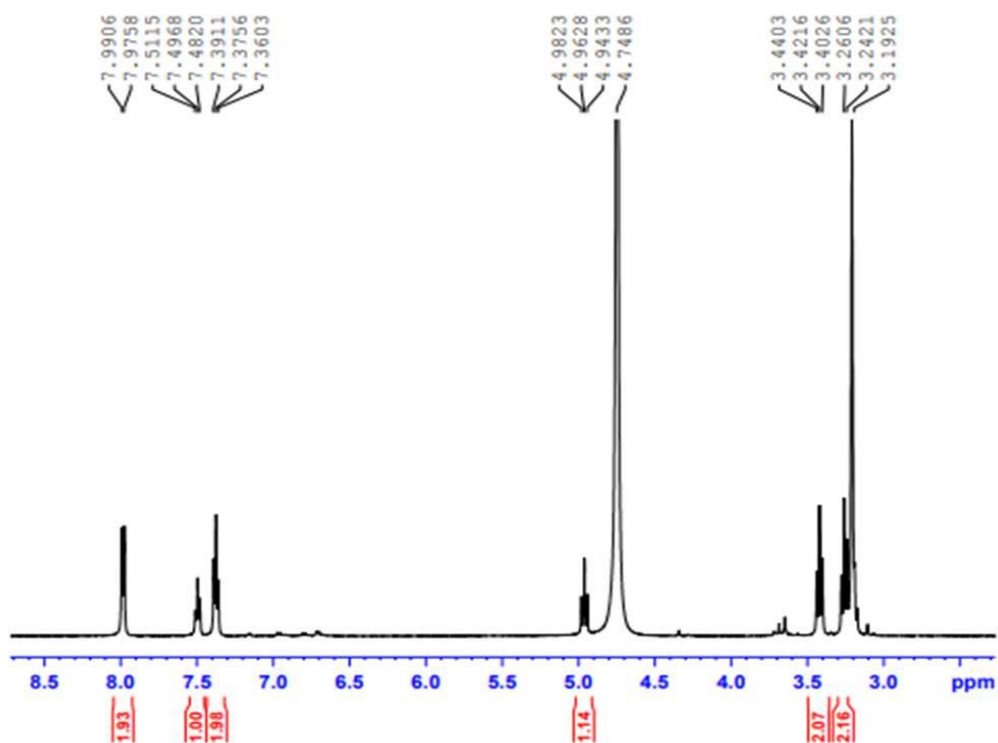

# <sup>1</sup>H NMR of compound 7

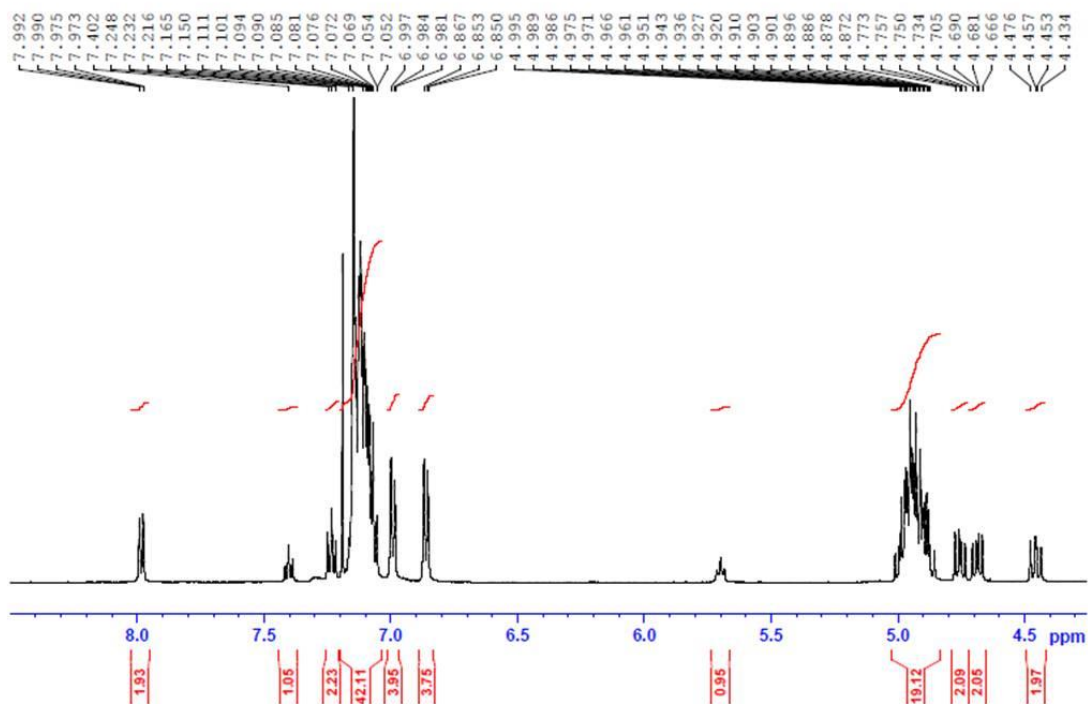

## COSY of compound 7

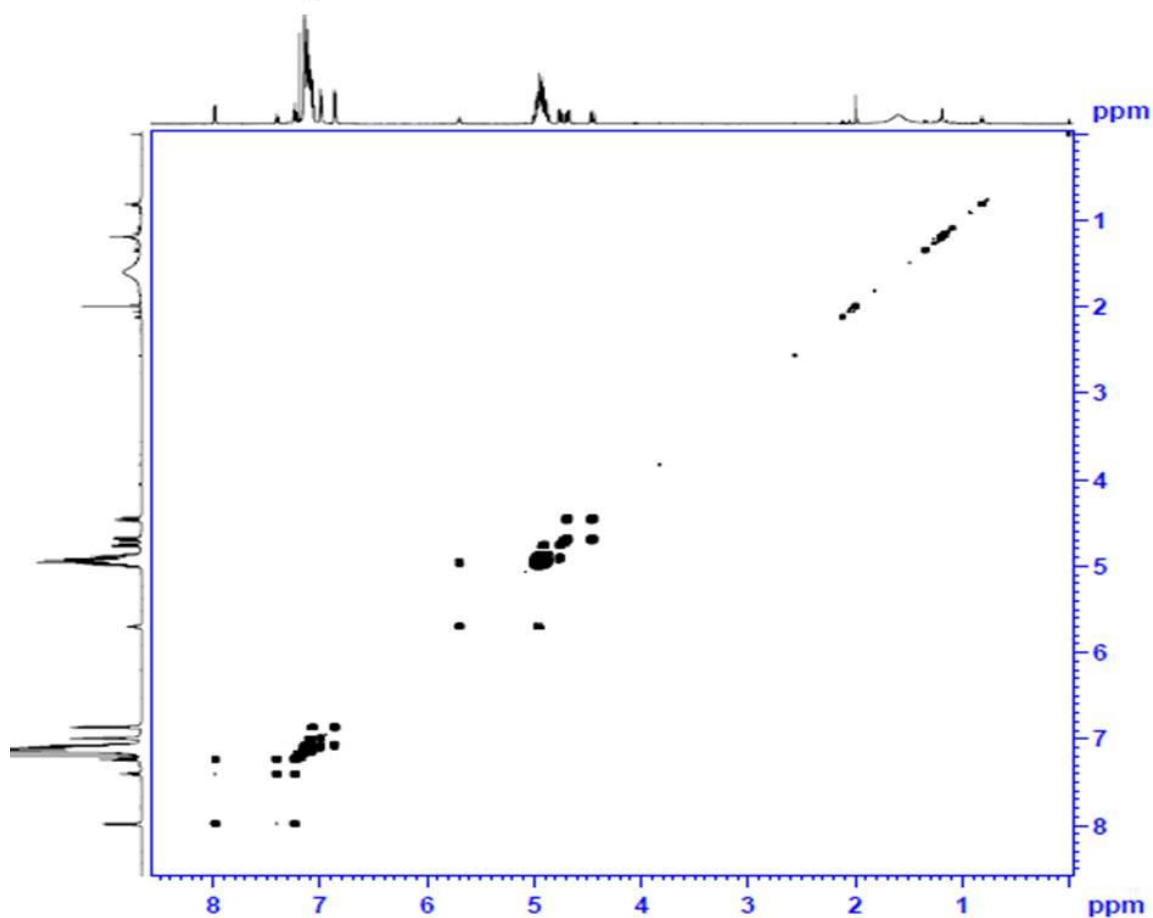

# DEPT of compound 7

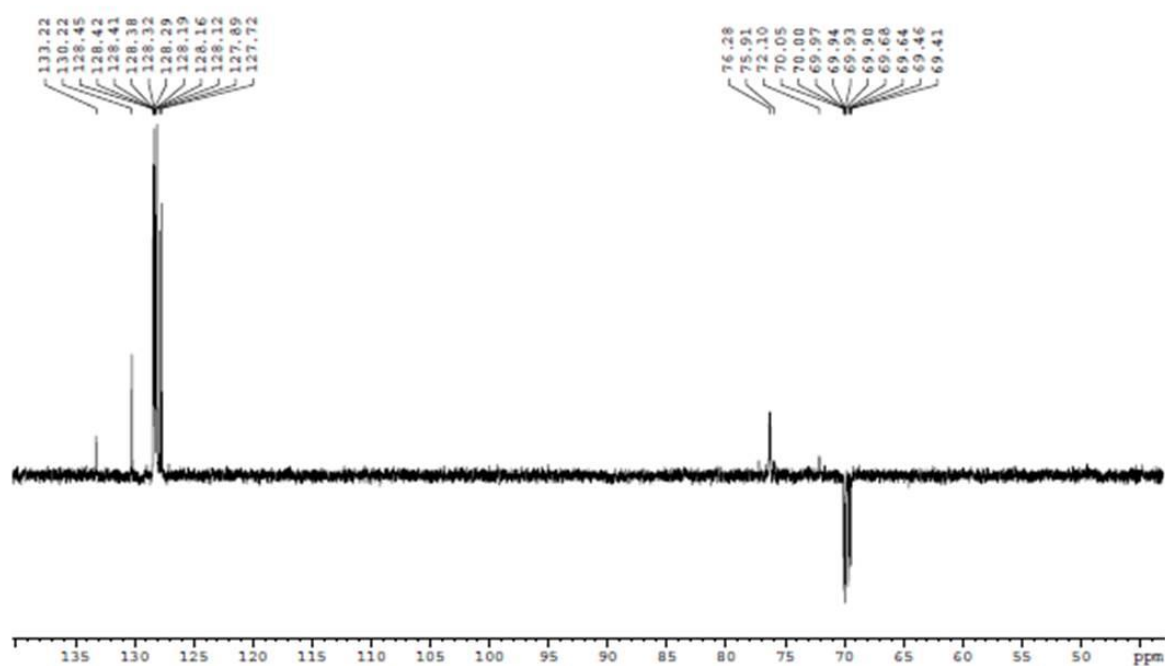

## $^{13}\text{C}$ of compound 7

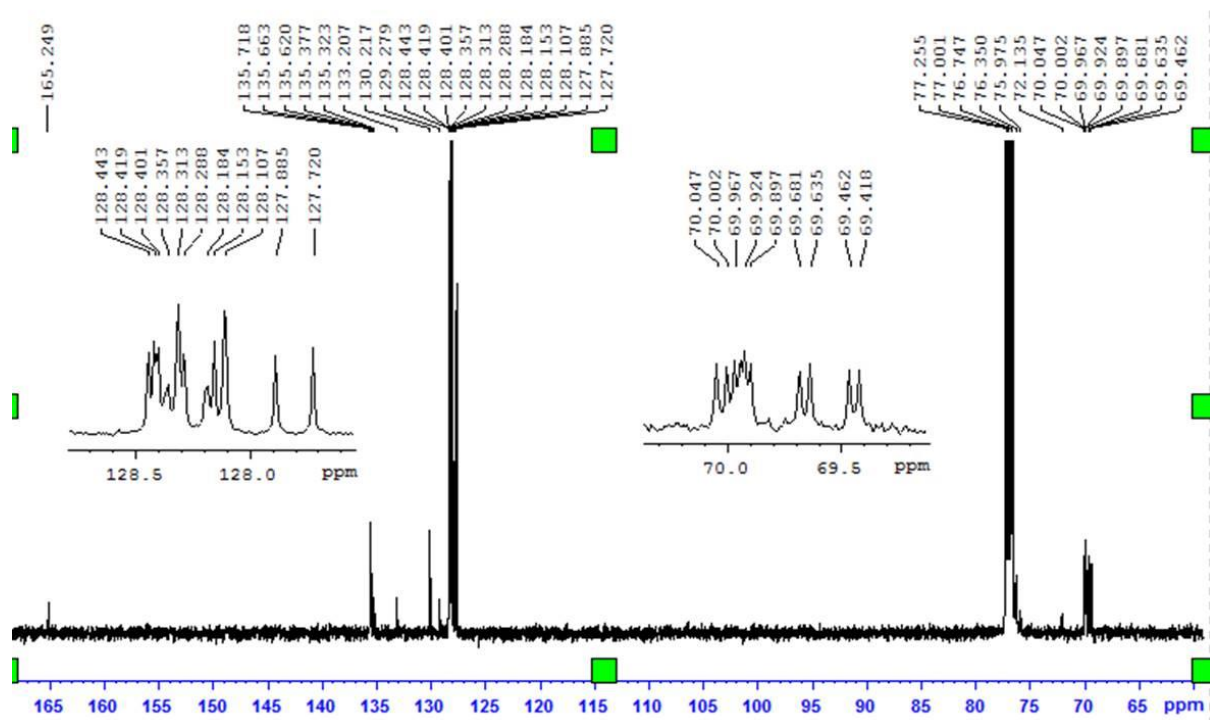

# HMQC of compound 7

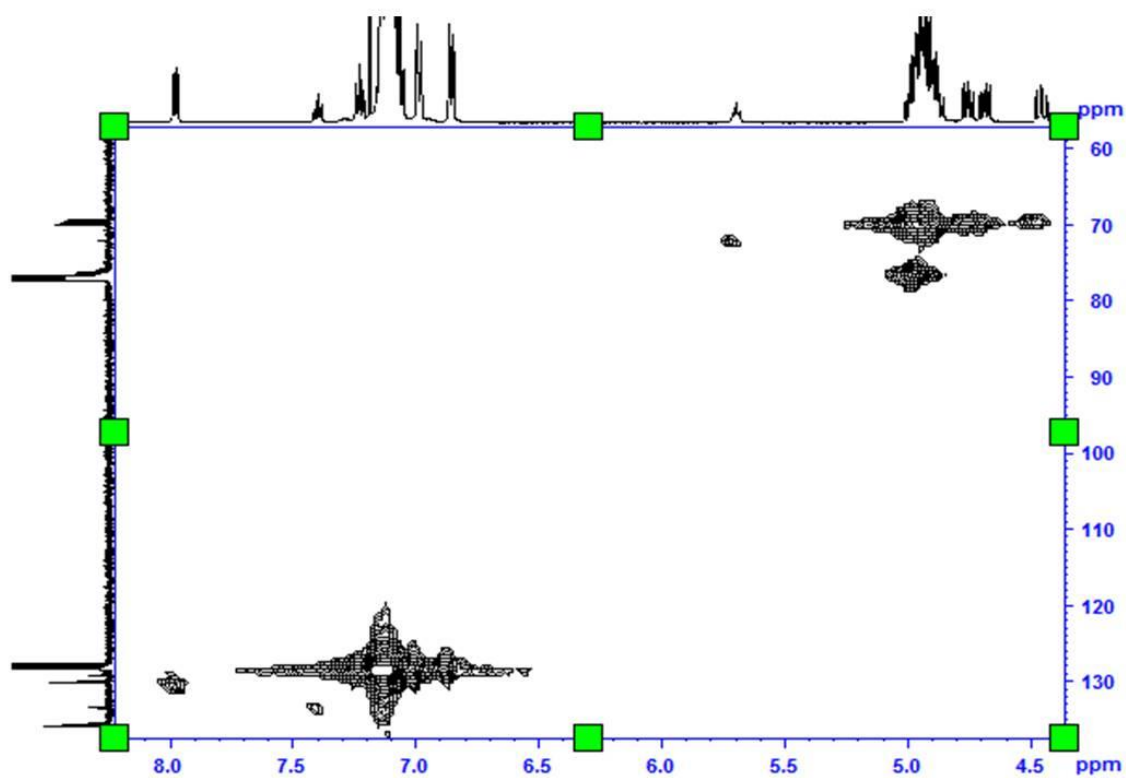

## $^1\text{H}$ NMR of compound 8 ( $\text{CD}_3\text{OD}$ )

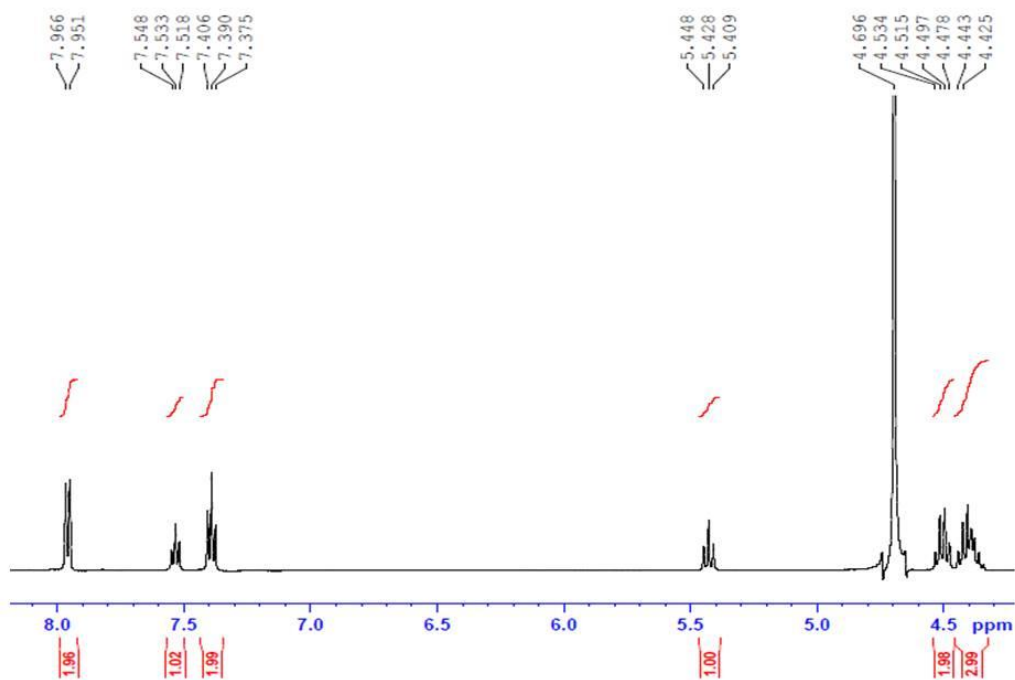

# COSY of compound 8

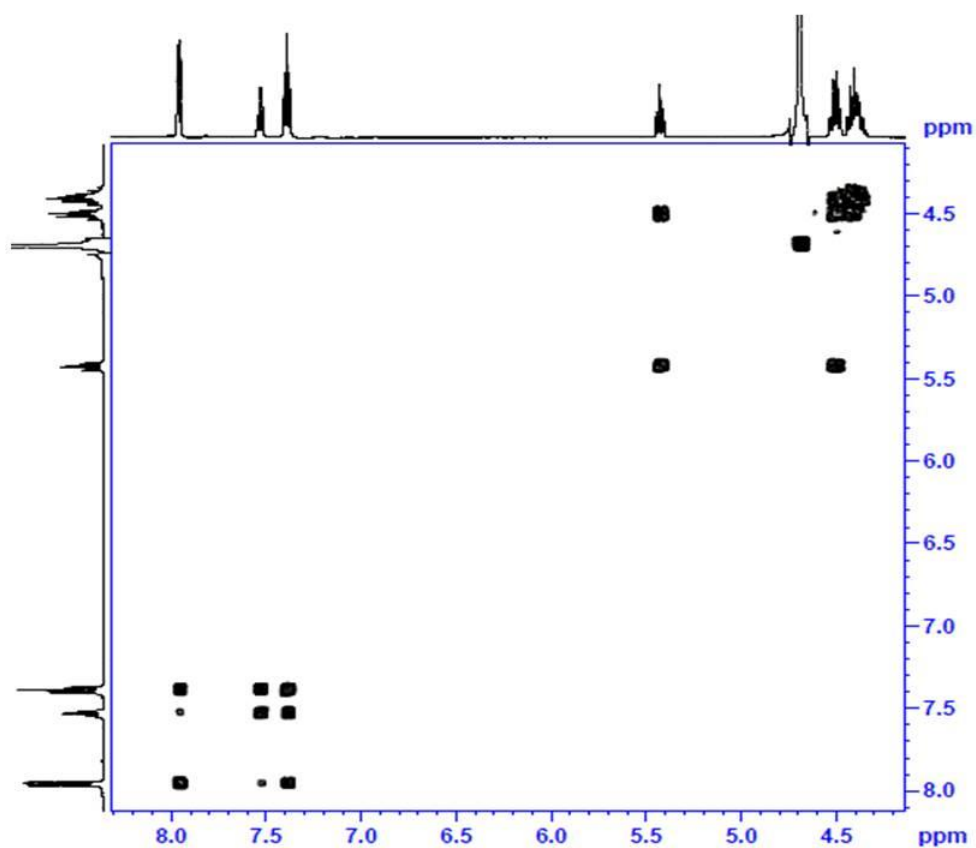

# DEPT of compound 8

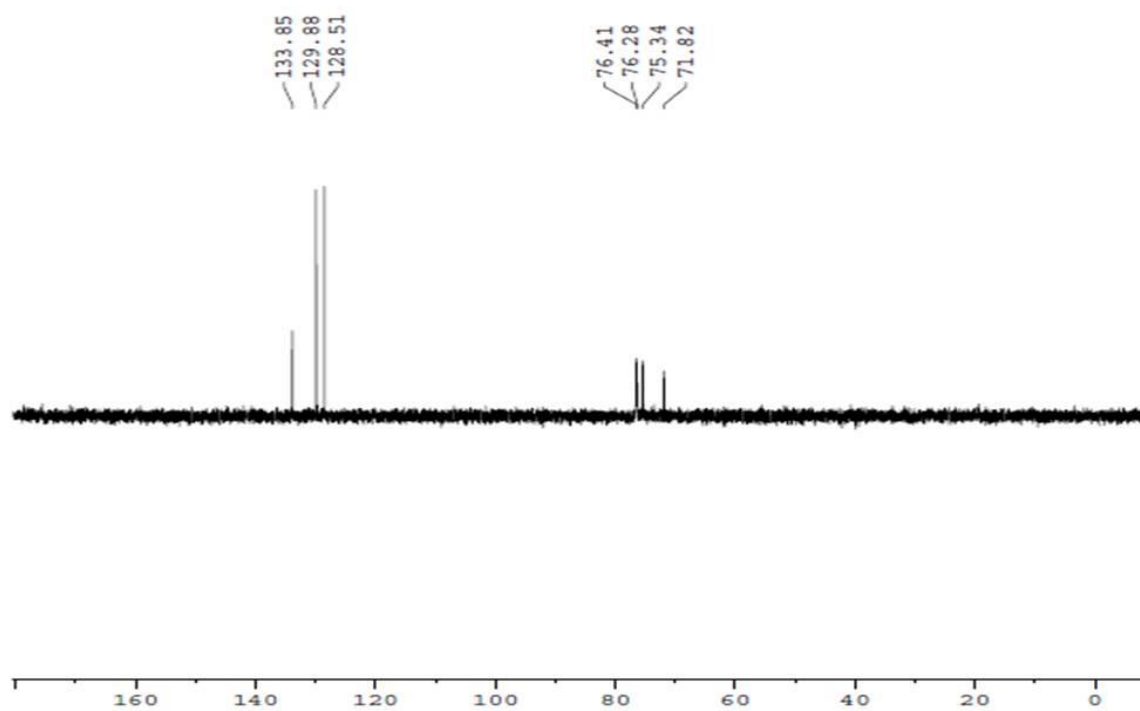

# $^{13}\text{C}$ of compound 8

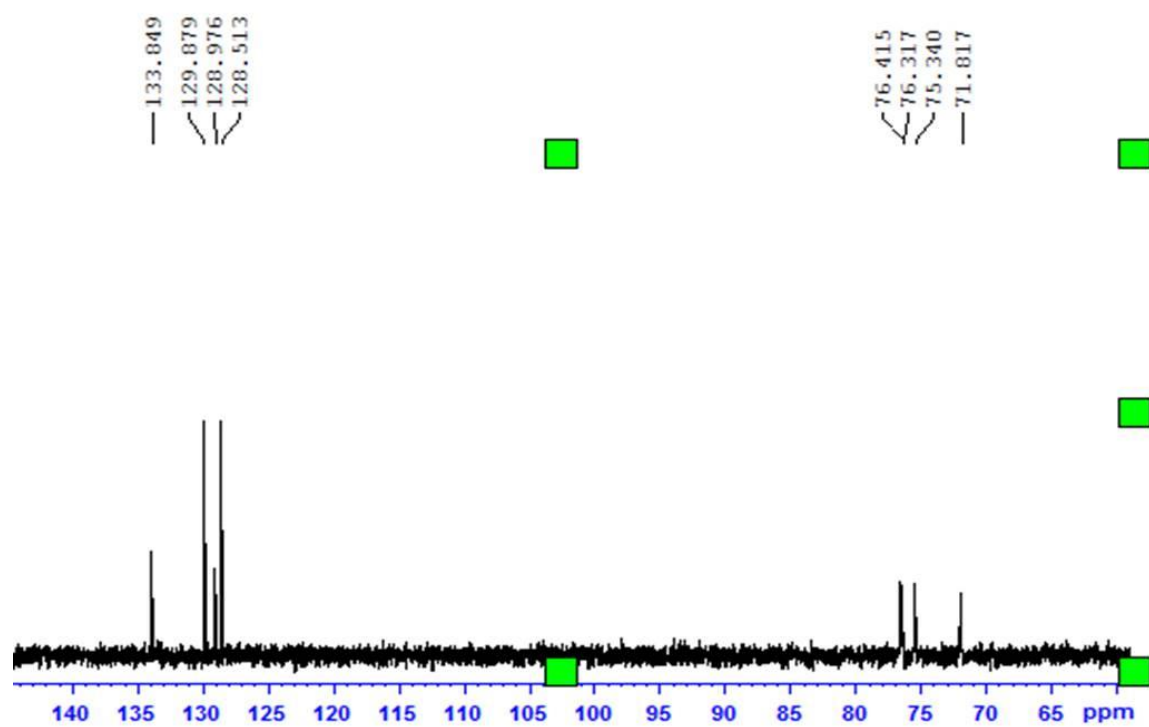

## HMQC of compound 8

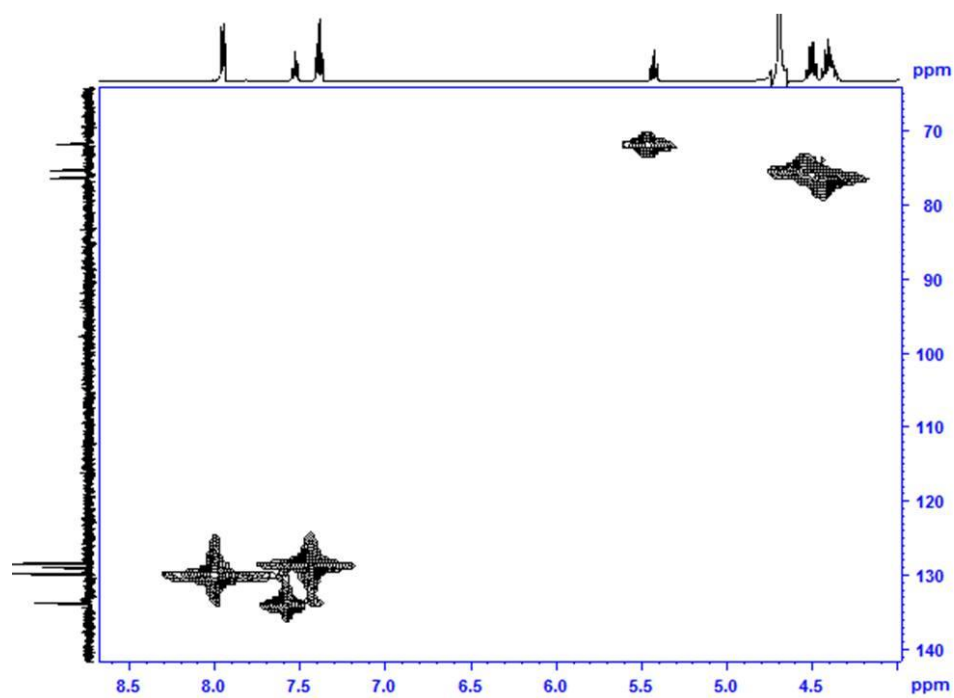

$^1\text{H}$  NMR of compound 9

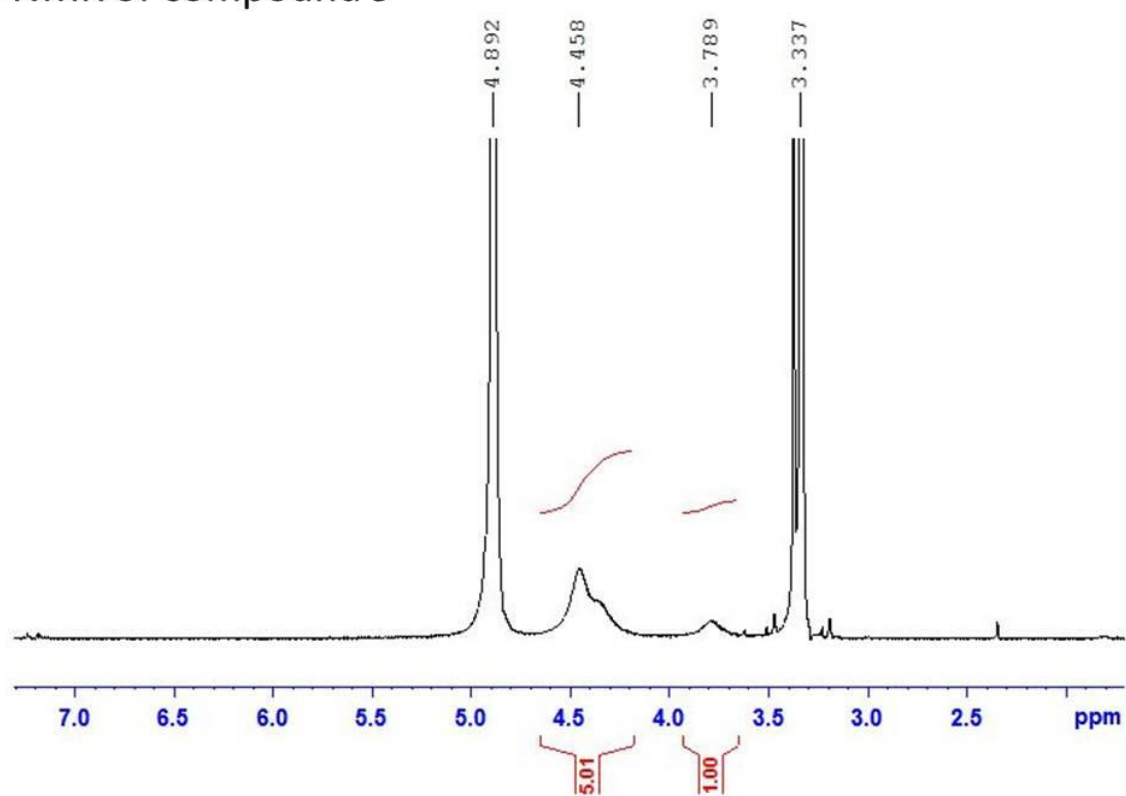

$^{31}\text{P}$  of compound 9

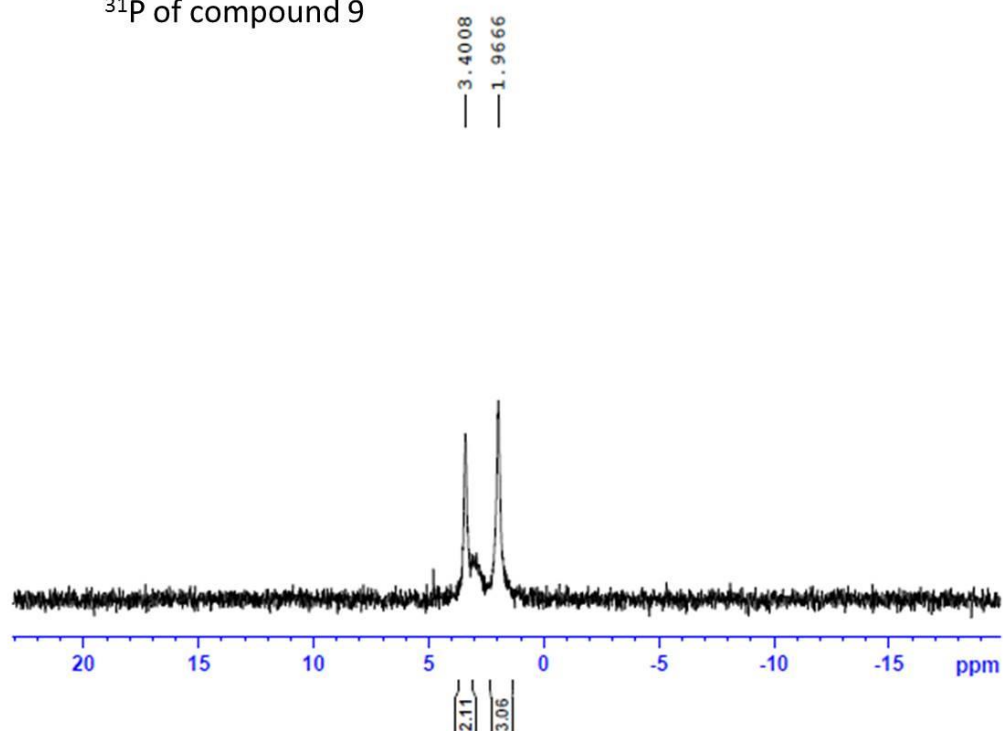



# <sup>1</sup>H NMR of compound 11

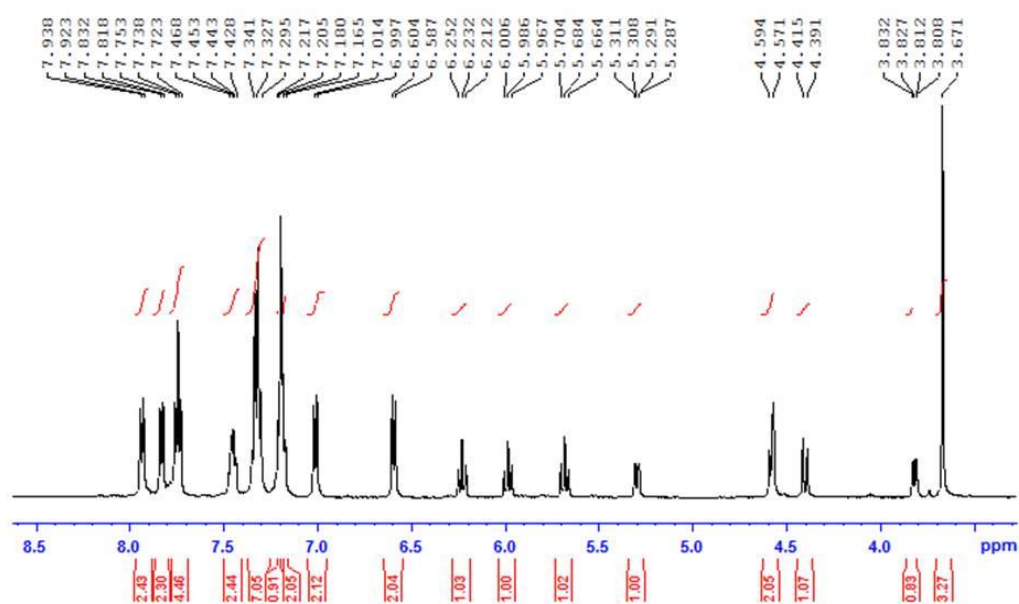

## COSY of compound 11

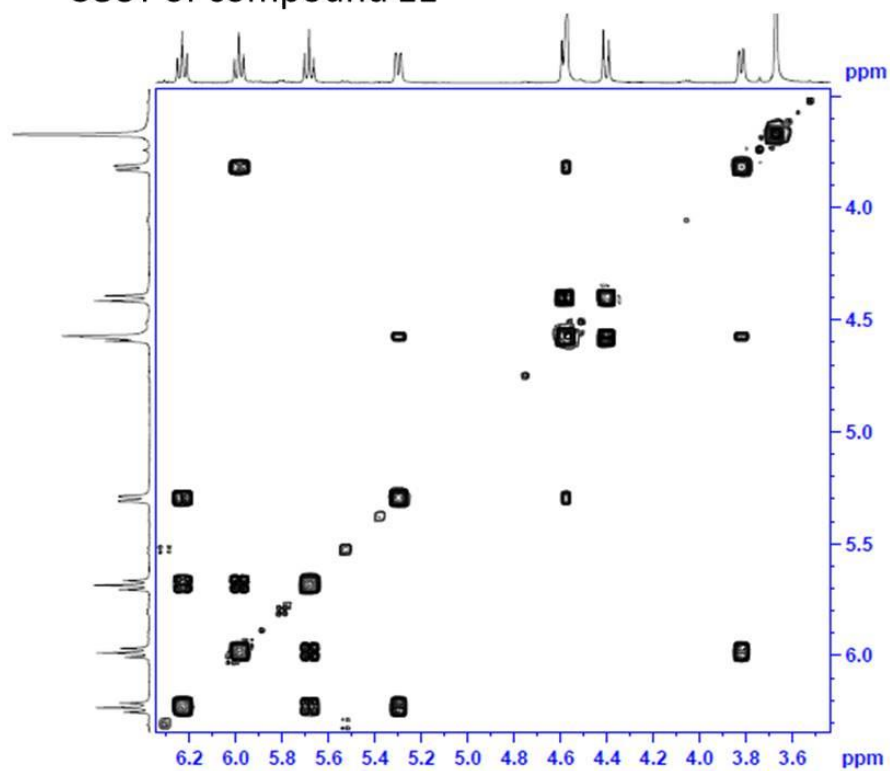

# DEPT of compound 11

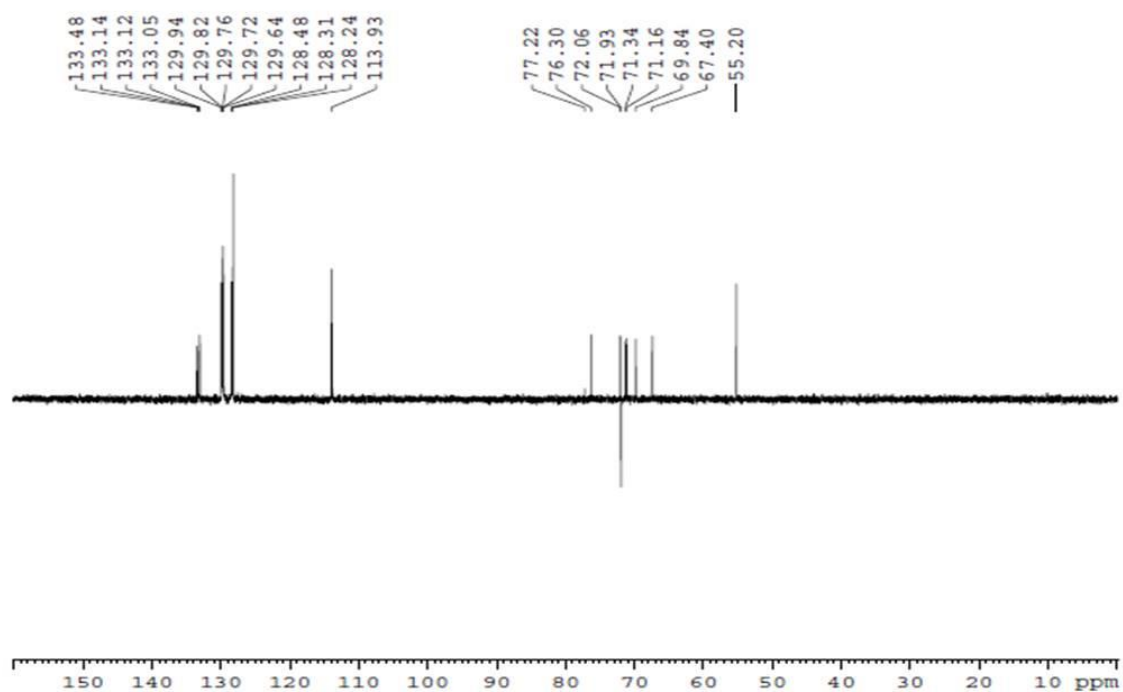

## <sup>13</sup>C of Compound 11

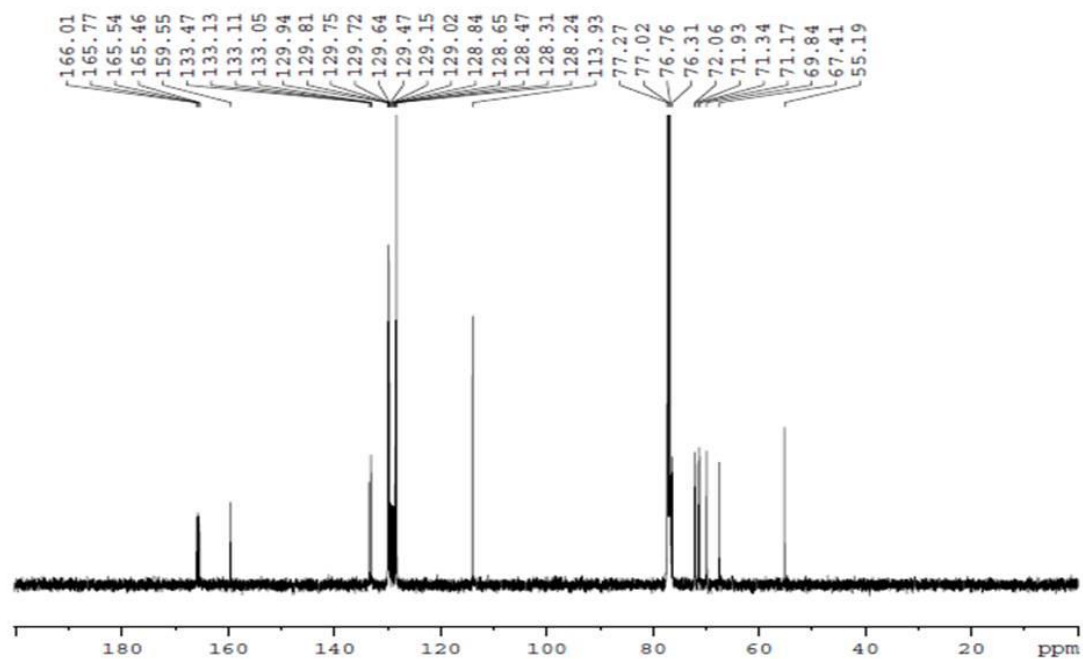

HMQC of compound 11

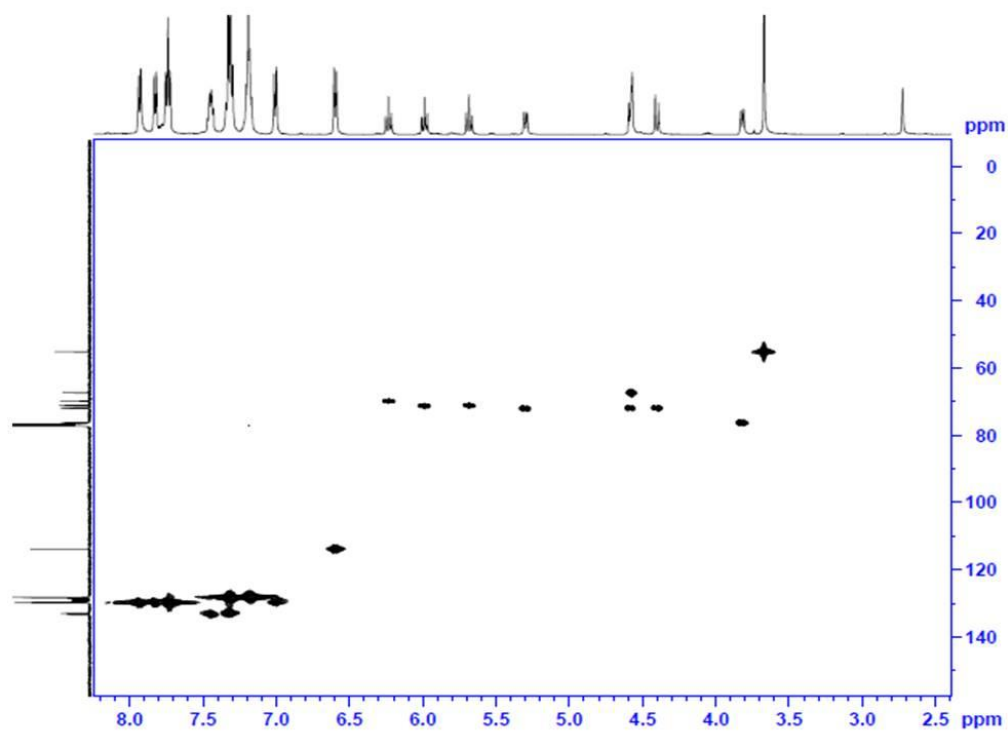

$^1\text{H}$  NMR of compound 12

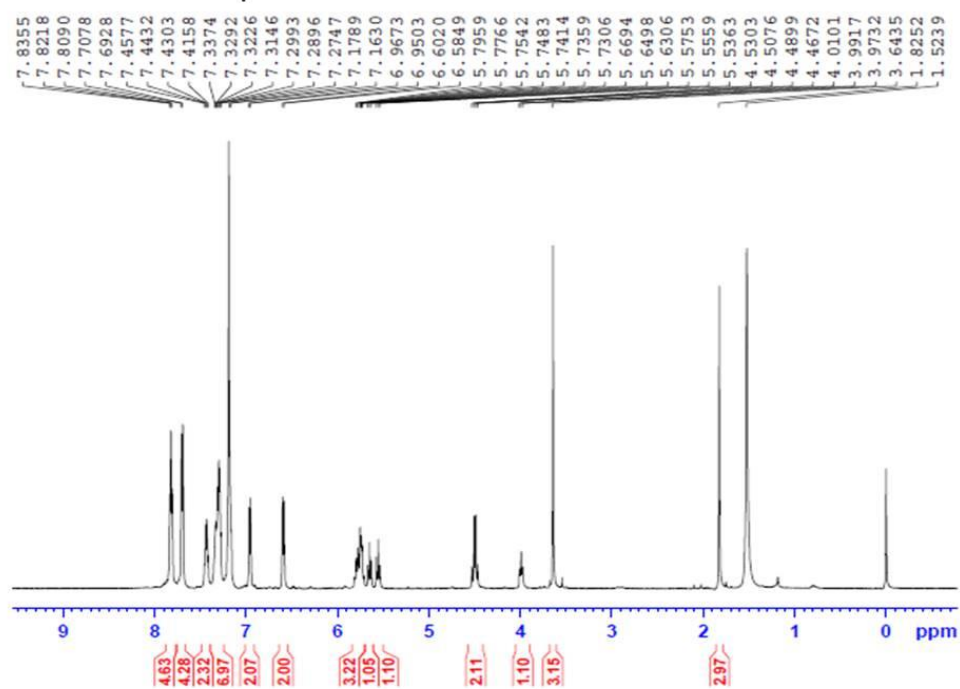

# COSY of compound of 12

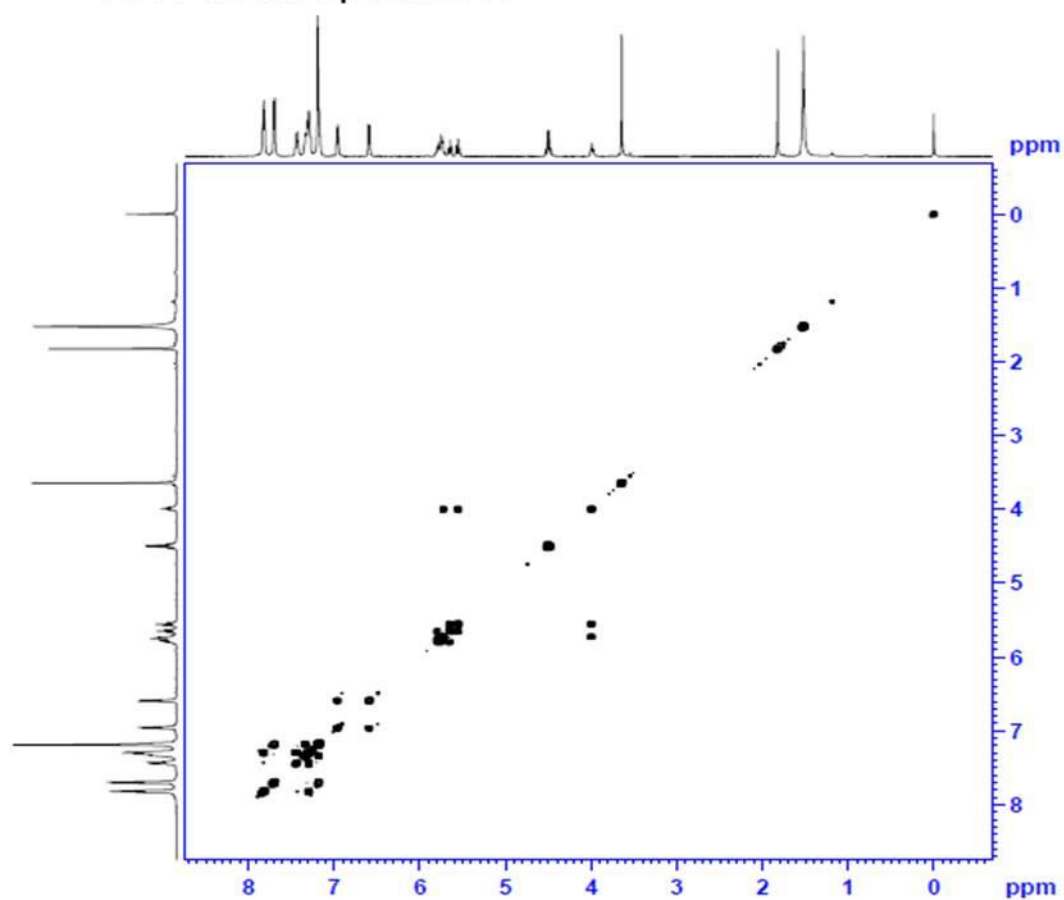

# DEPT of compound 12

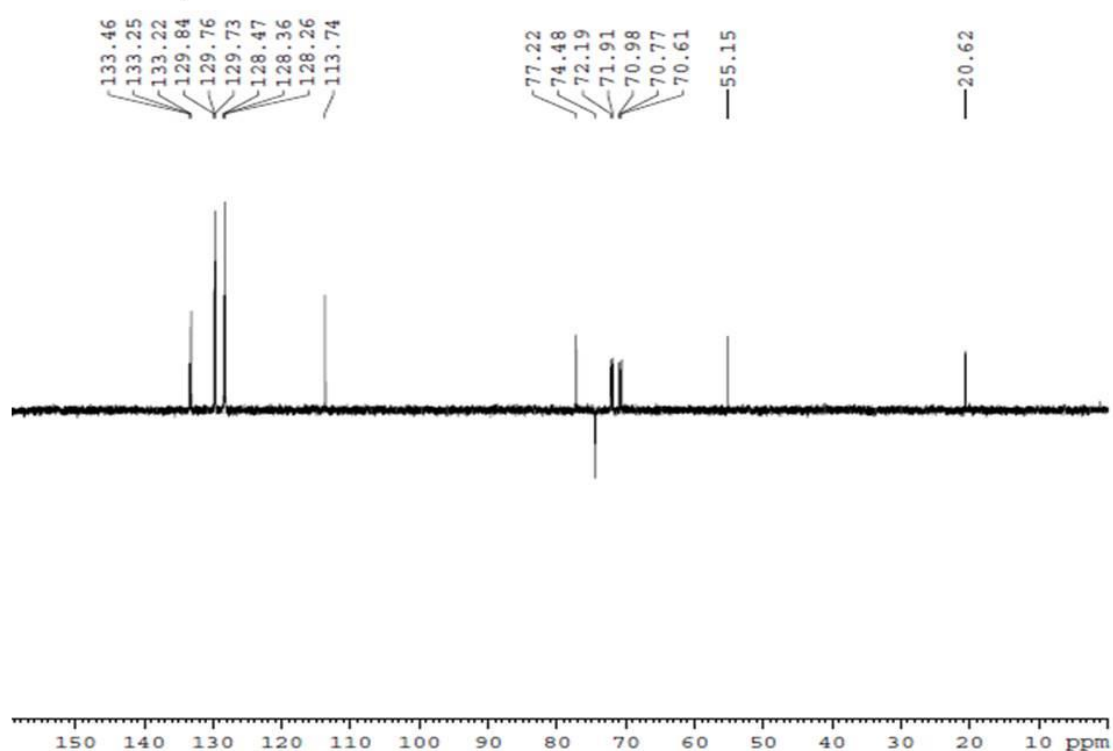

# $^{13}\text{C}$ of compound 12

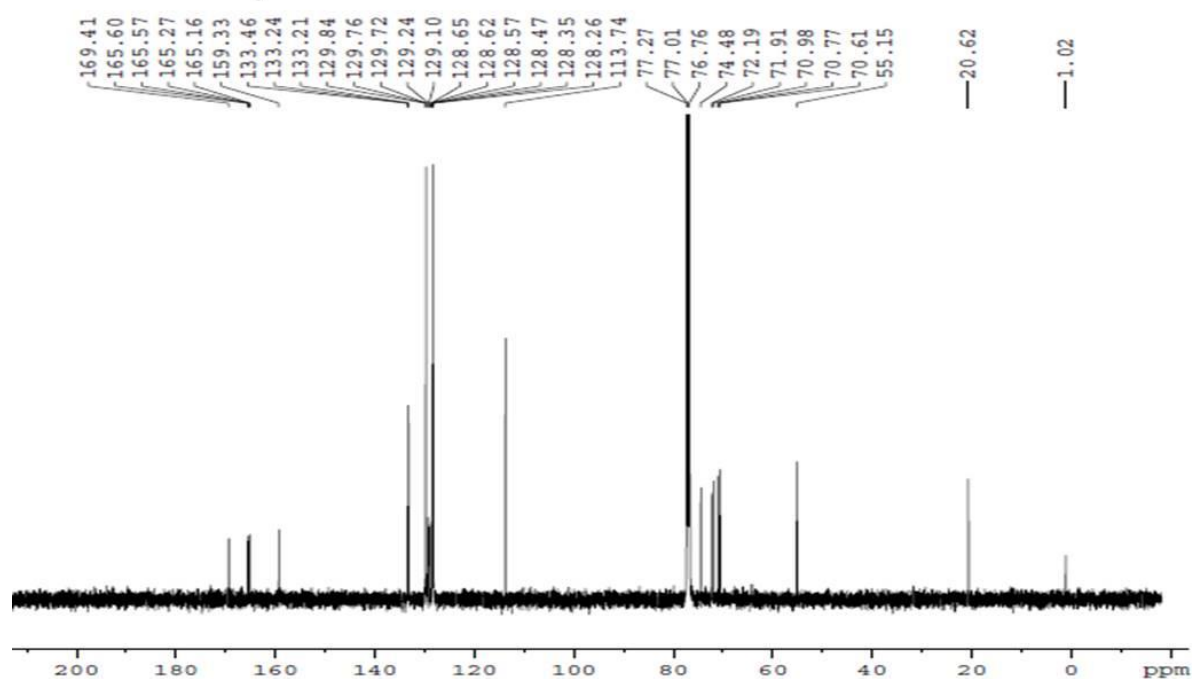

## HMQC of compound 12

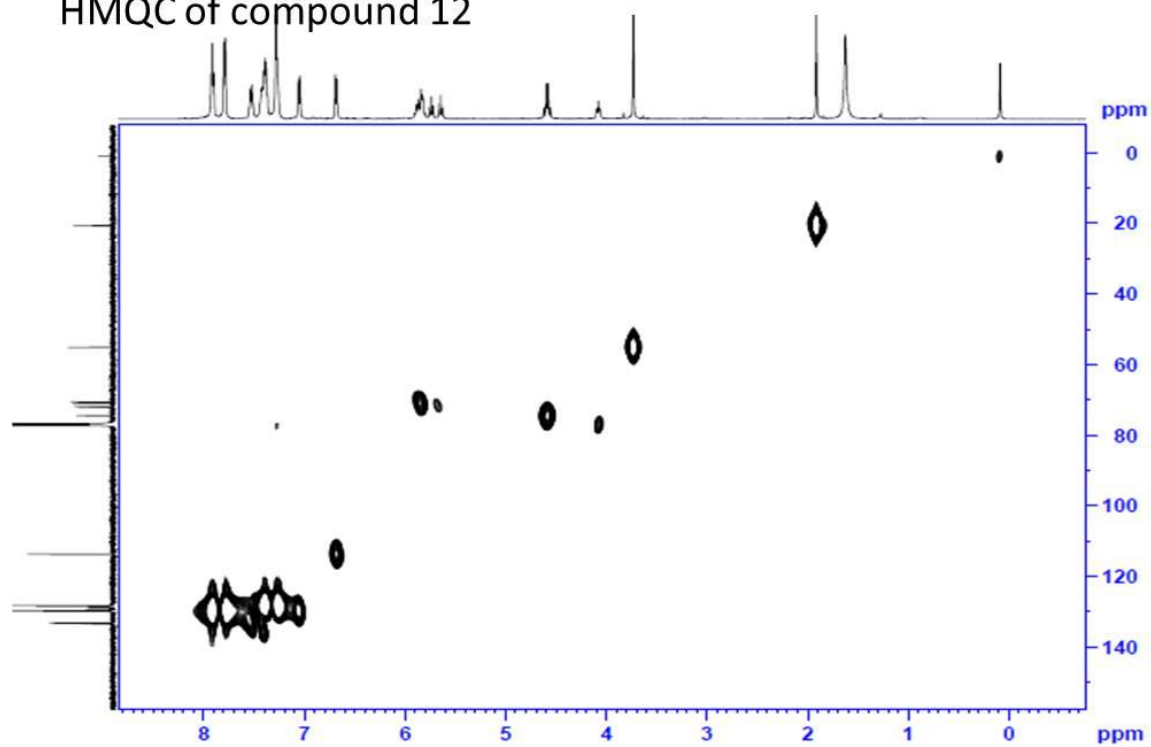

# <sup>1</sup>H NMR of compound 13

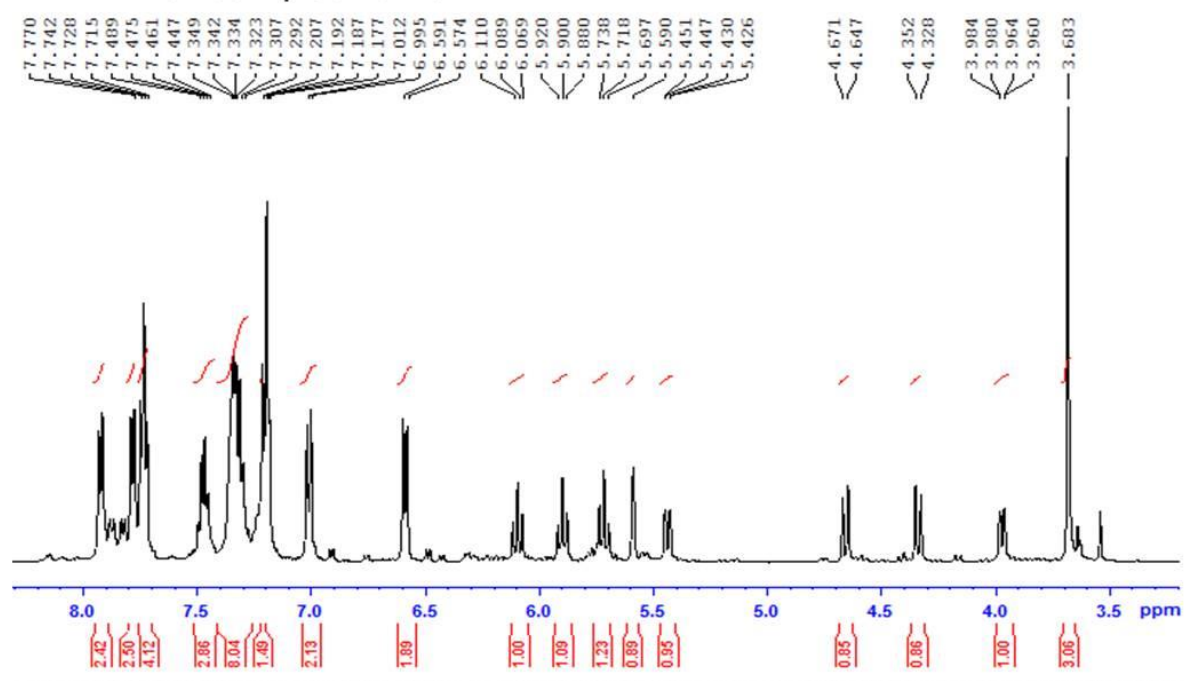

## COSY of compound 13

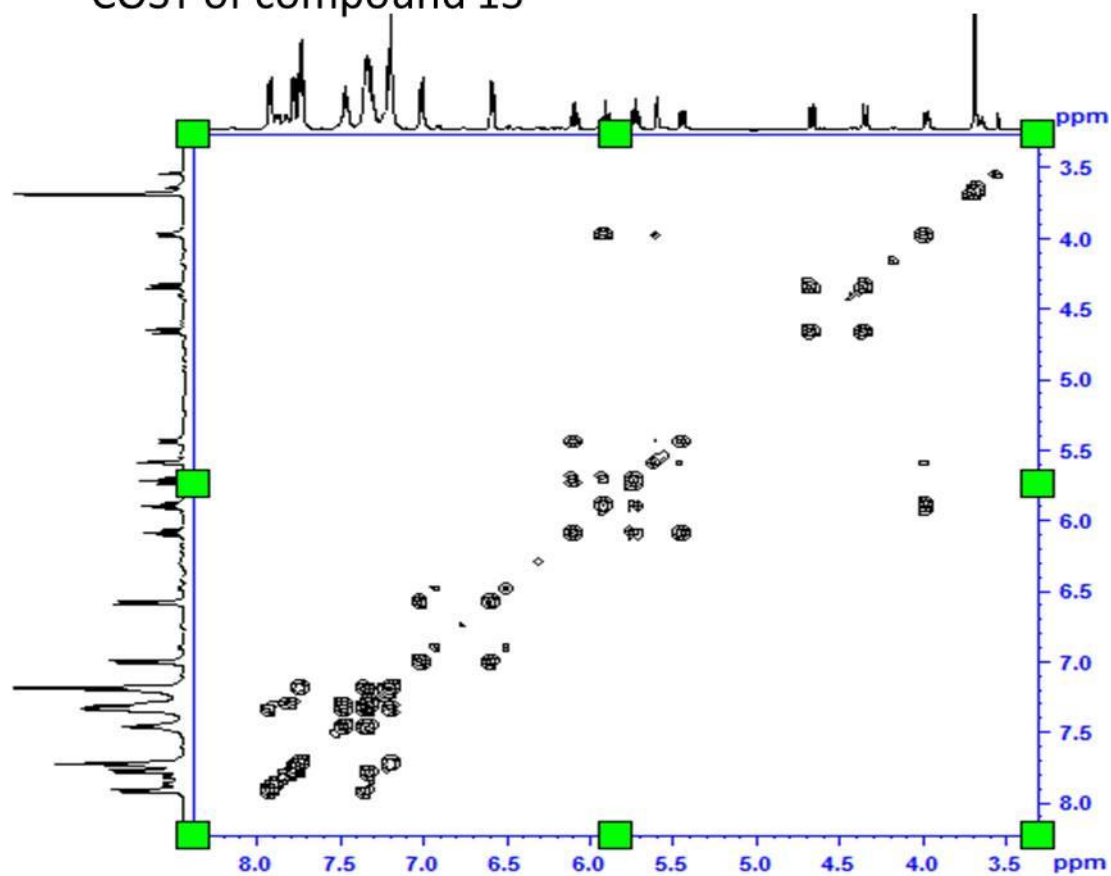

# DEPT of compound 13

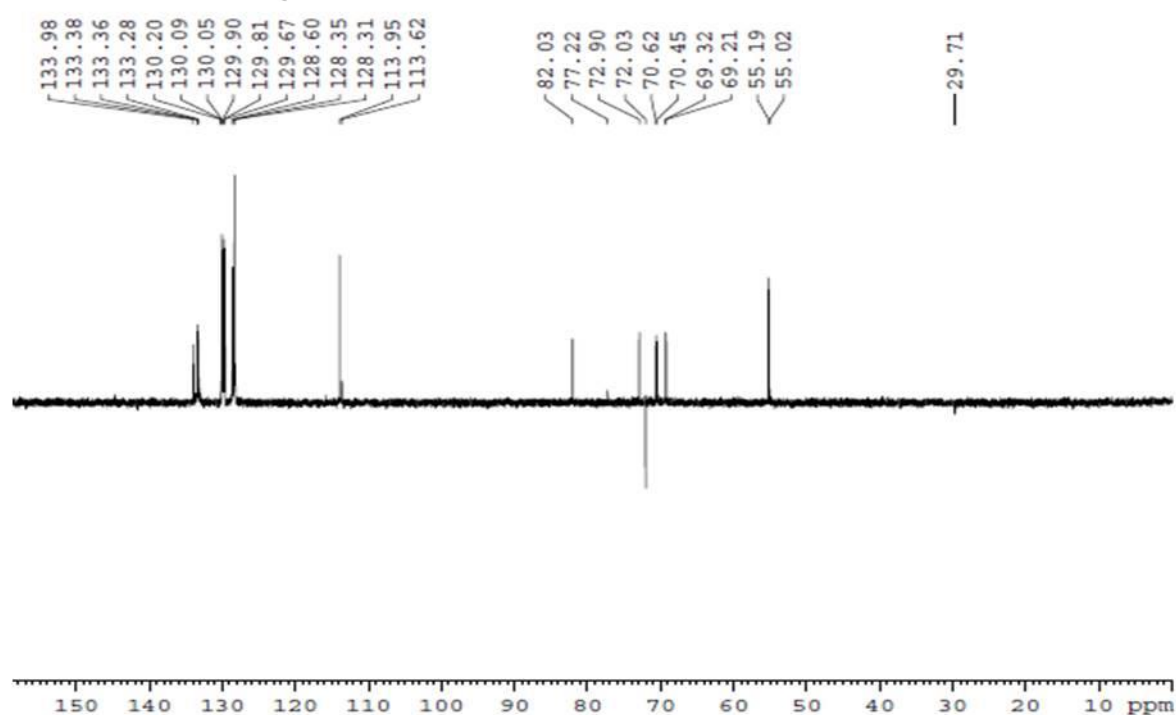

# <sup>13</sup>C of compound 13

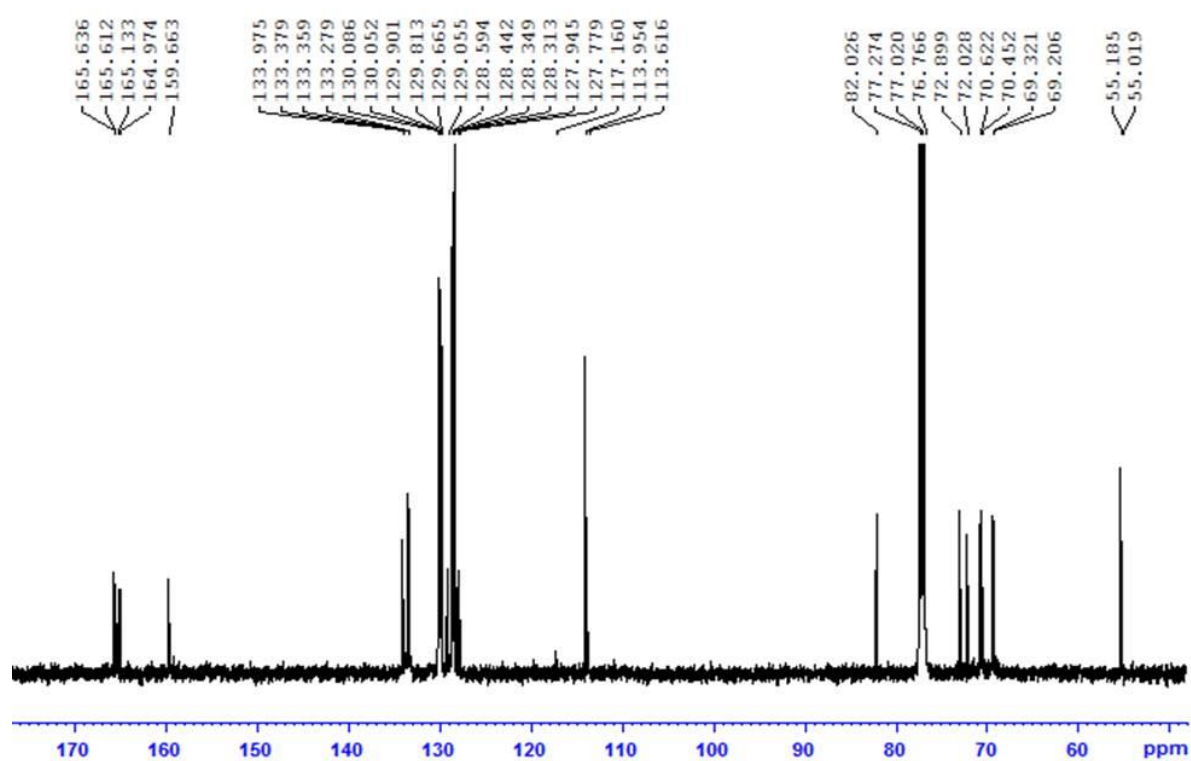



# HMQC of compound 13

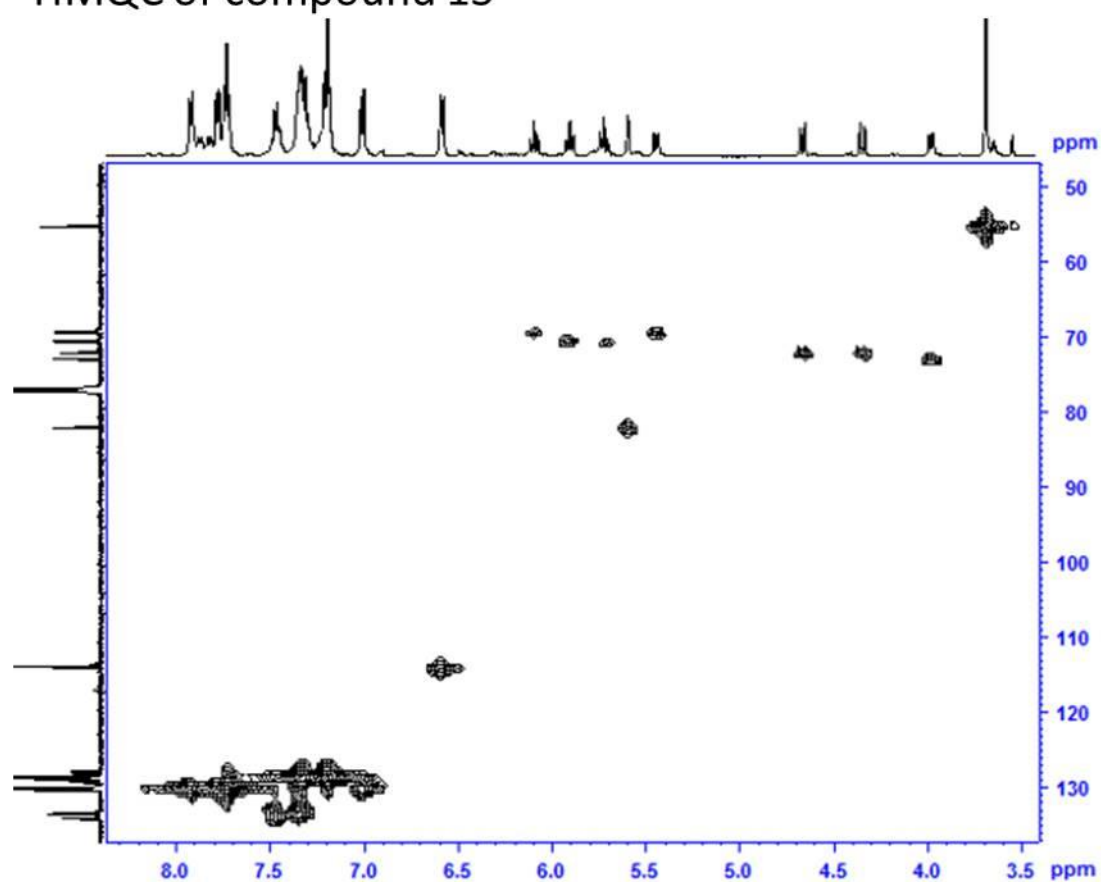

# $^1\text{H}$ NMR of compound 14

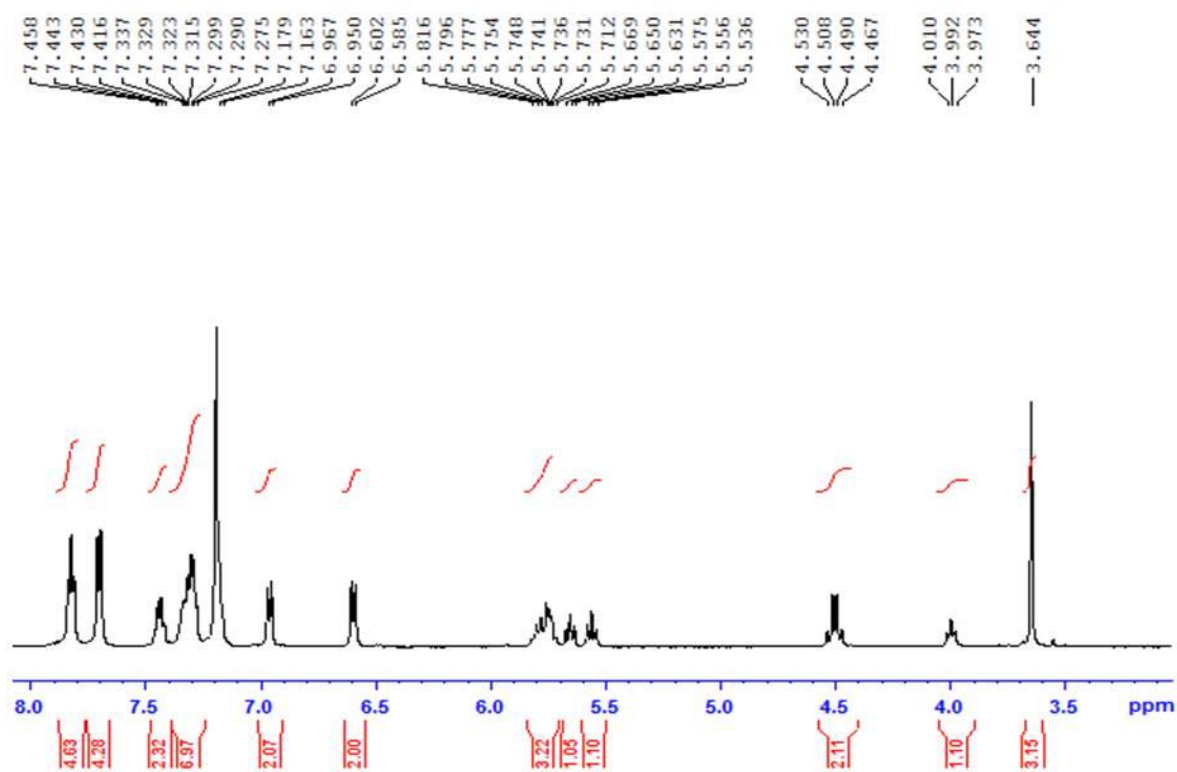



COSY of compound 14

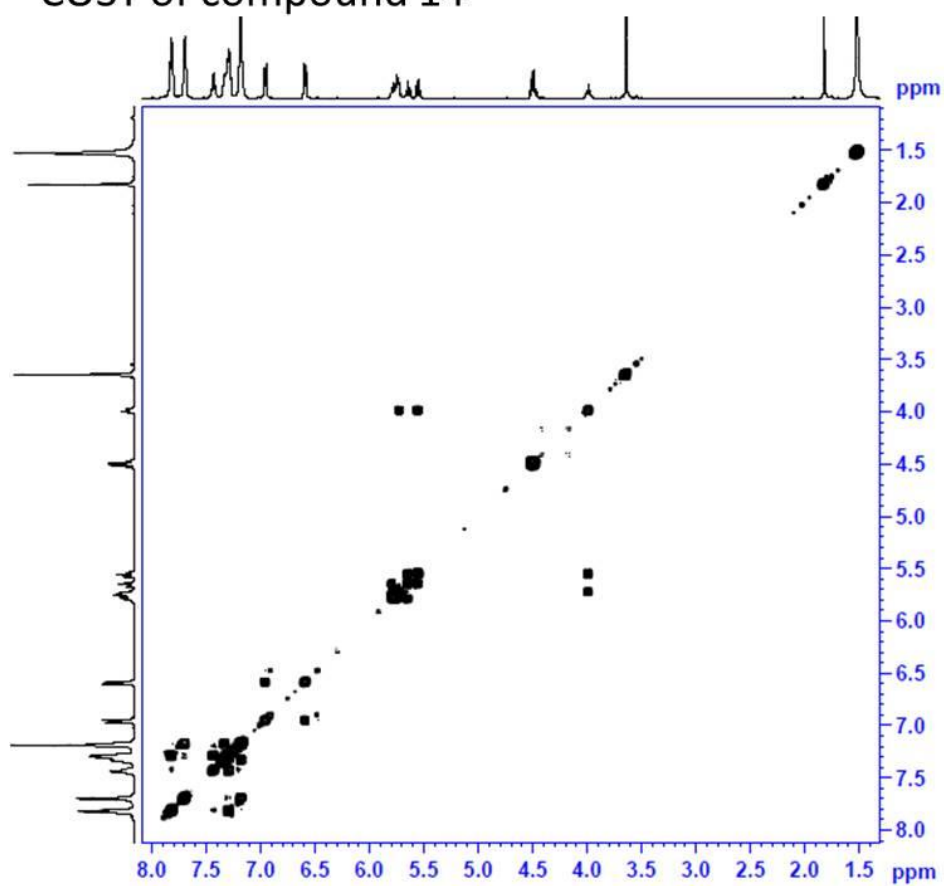

DEPT of compound 13

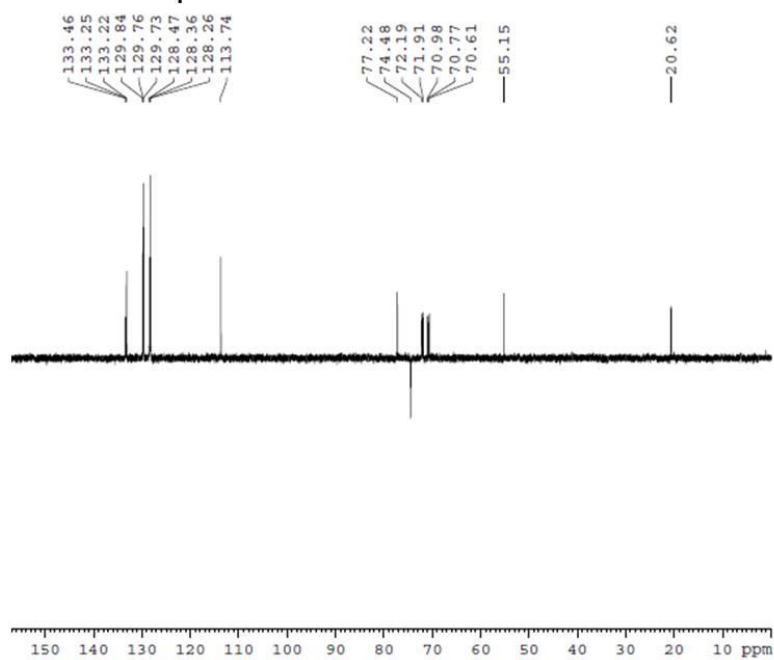

# $^{13}\text{C}$ of compound 13

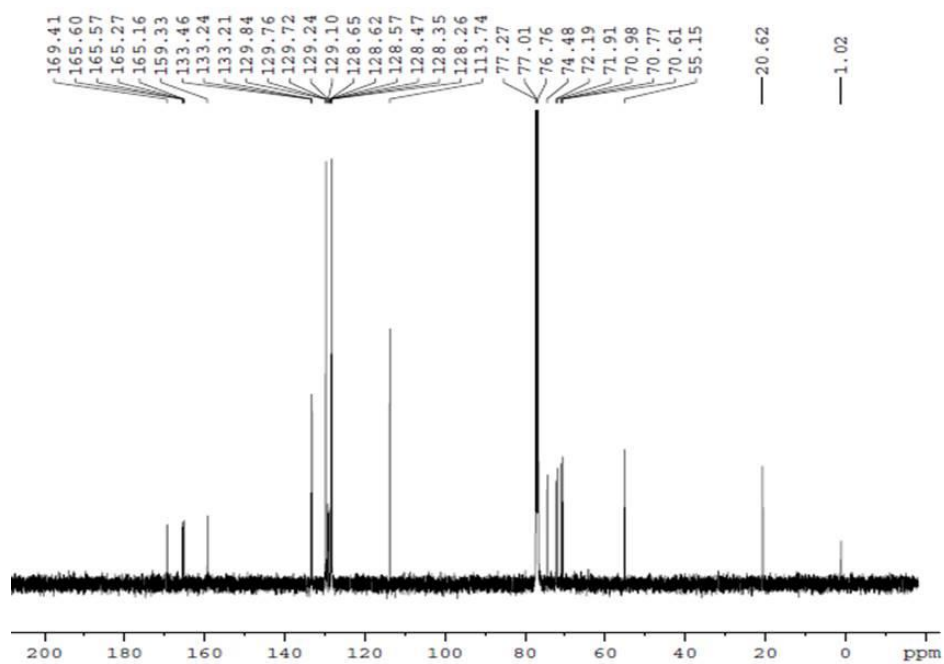

# HMQC of compound 13

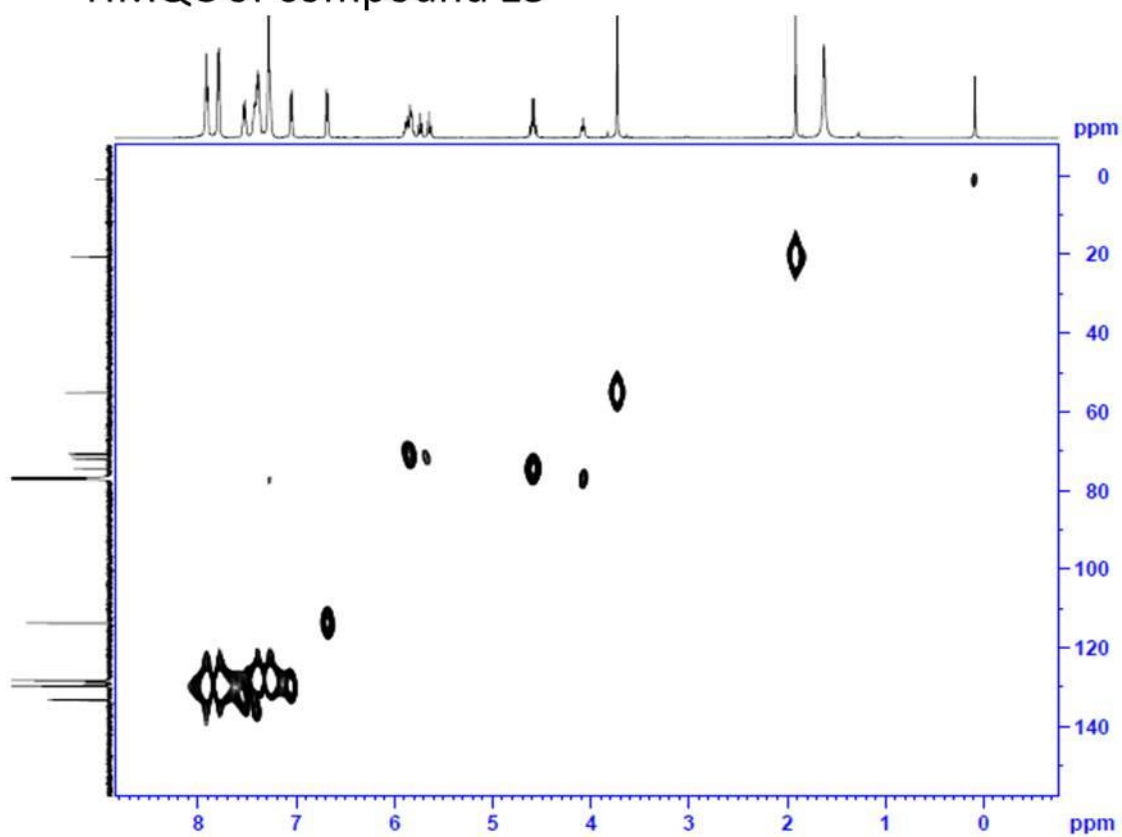

# <sup>1</sup>H NMR of compound 14

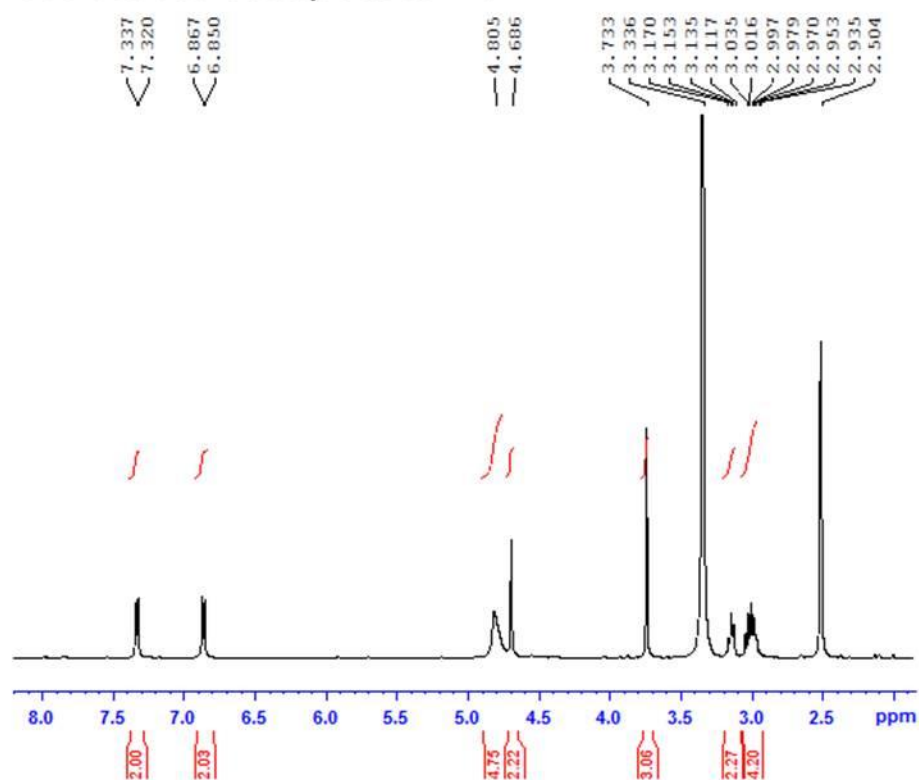

## COSY of compound 14

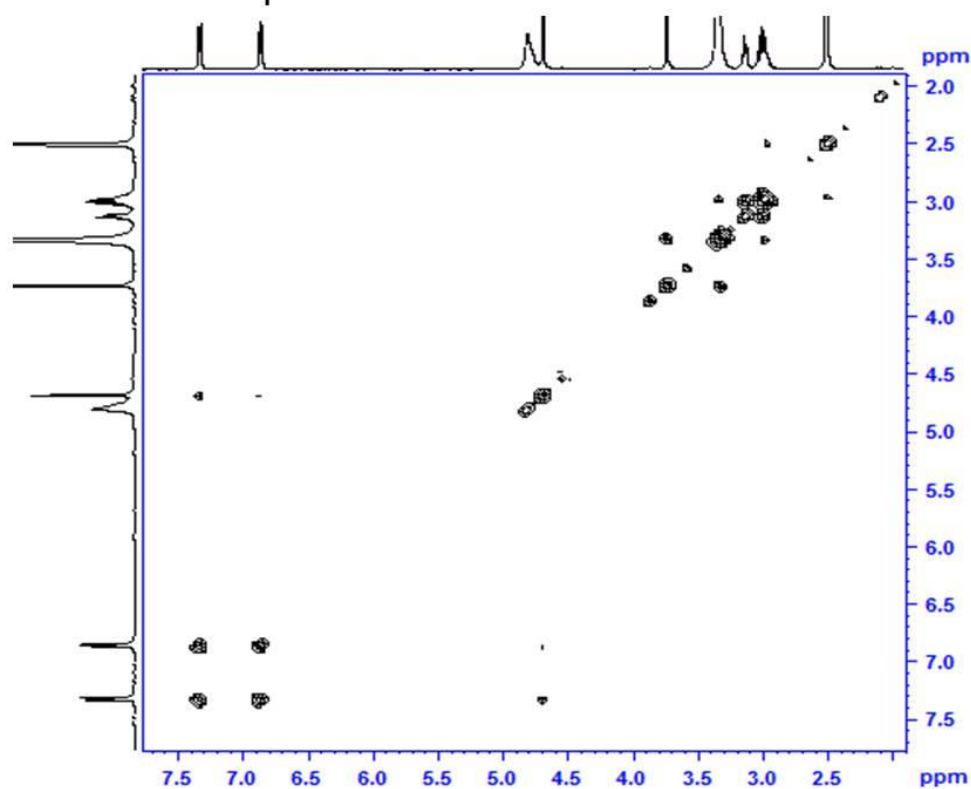

# DEPT of compound 14

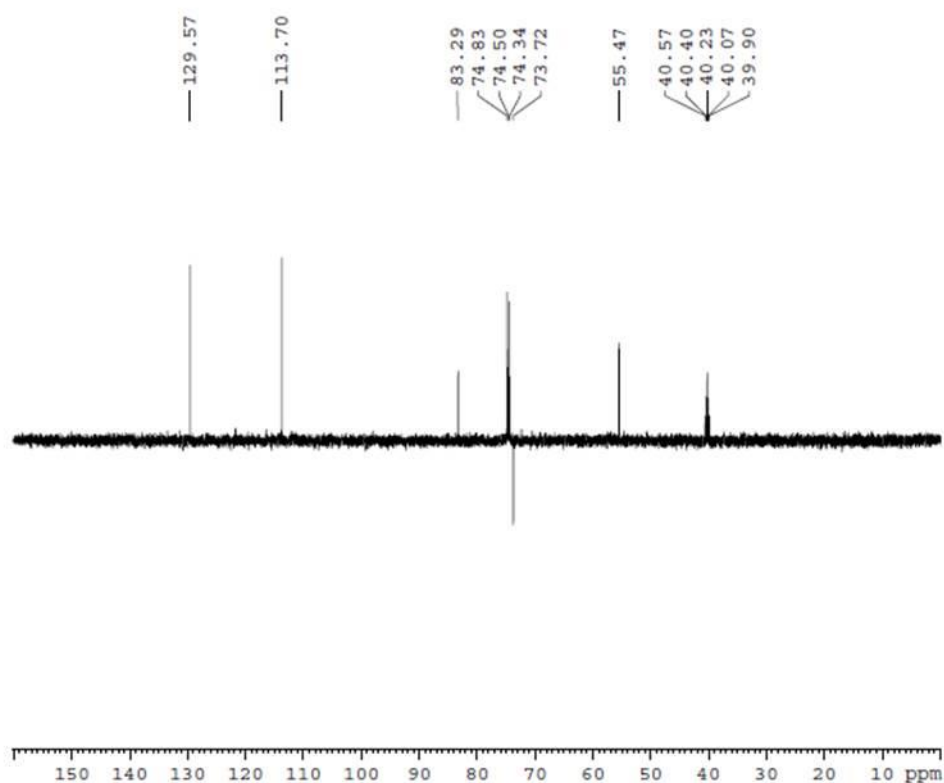

# <sup>13</sup>C of compound 14

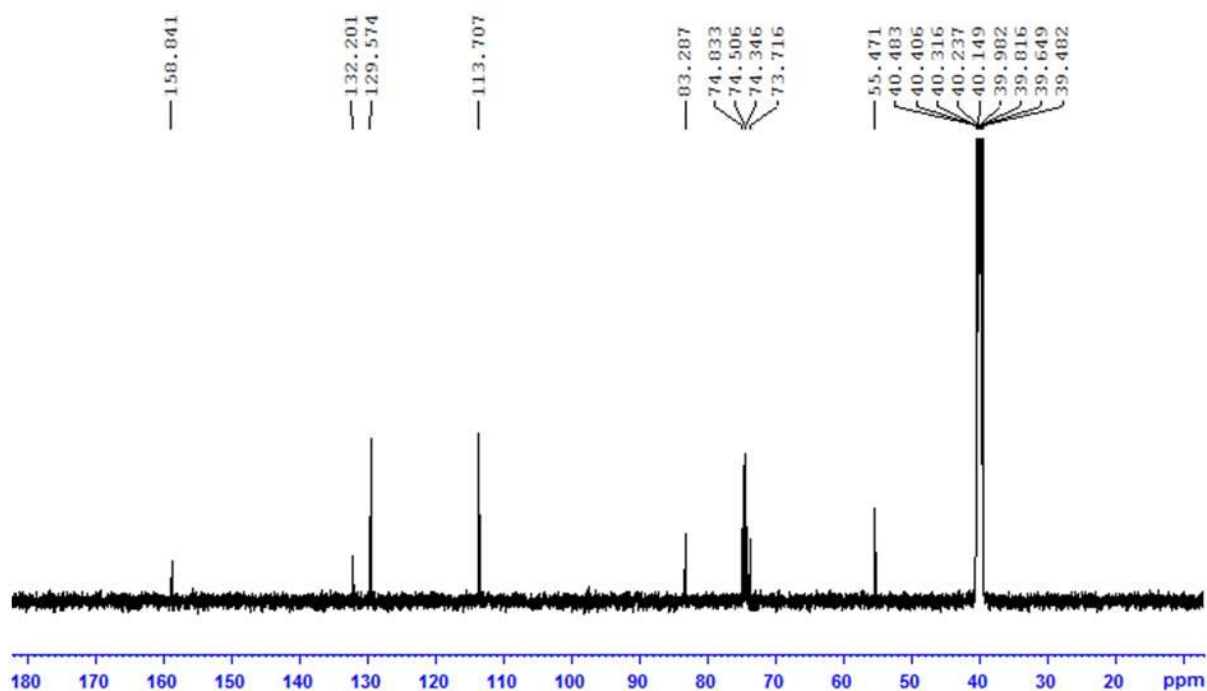

HMQC of compound 14

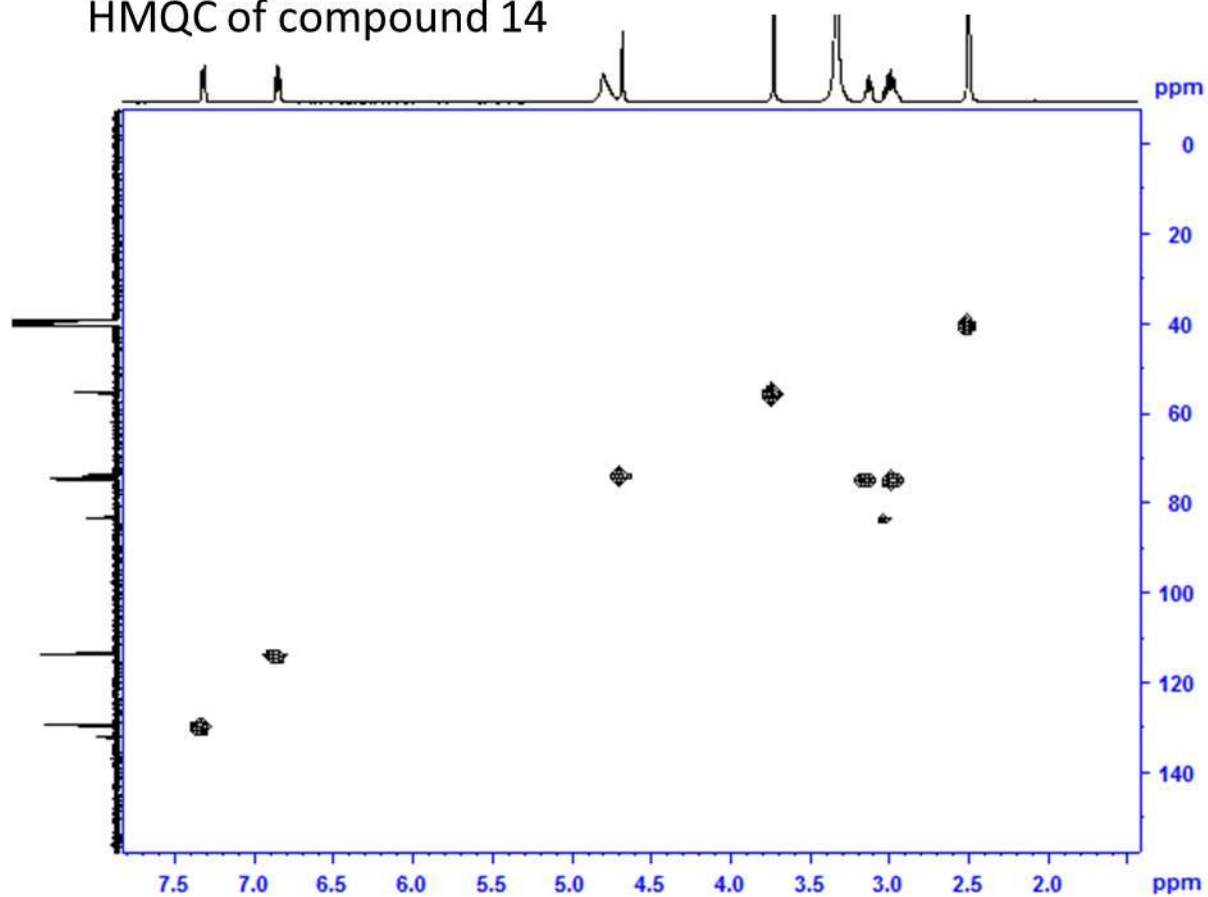

$^1\text{H}$  NMR of compound 15

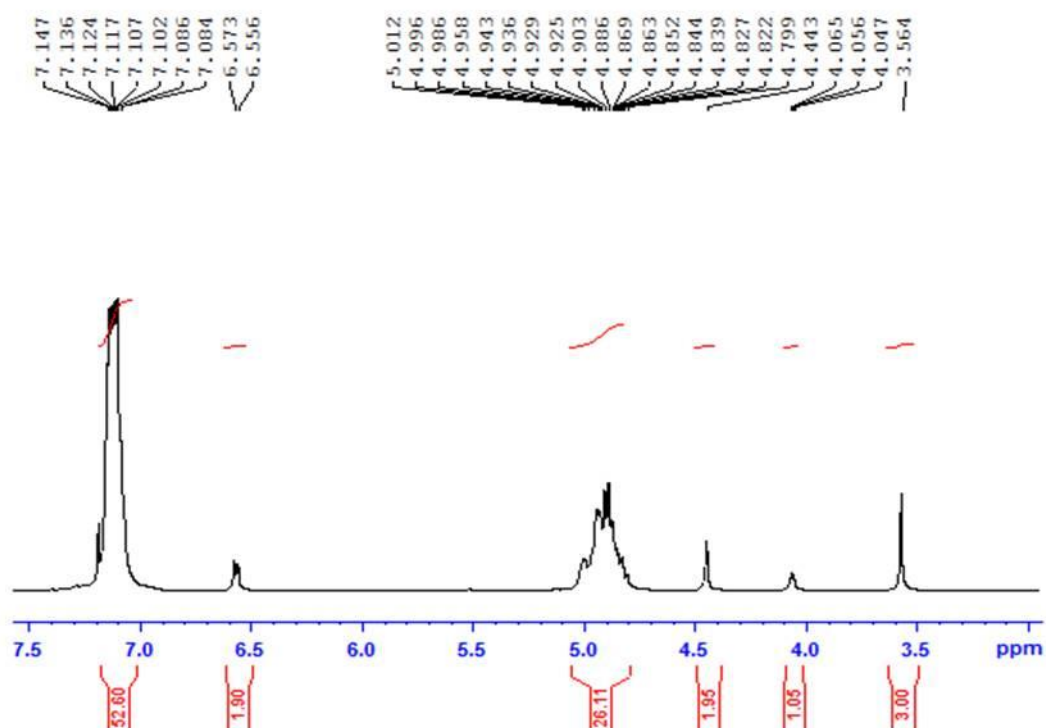

COSY of compound 15

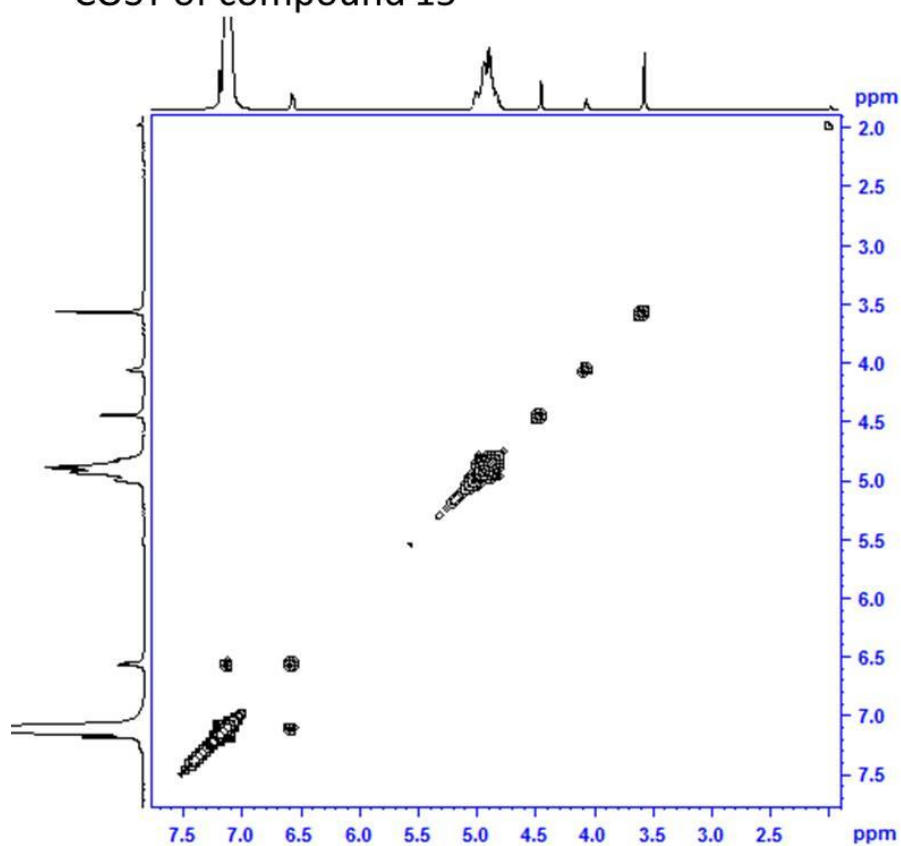

DEPT of compound 15

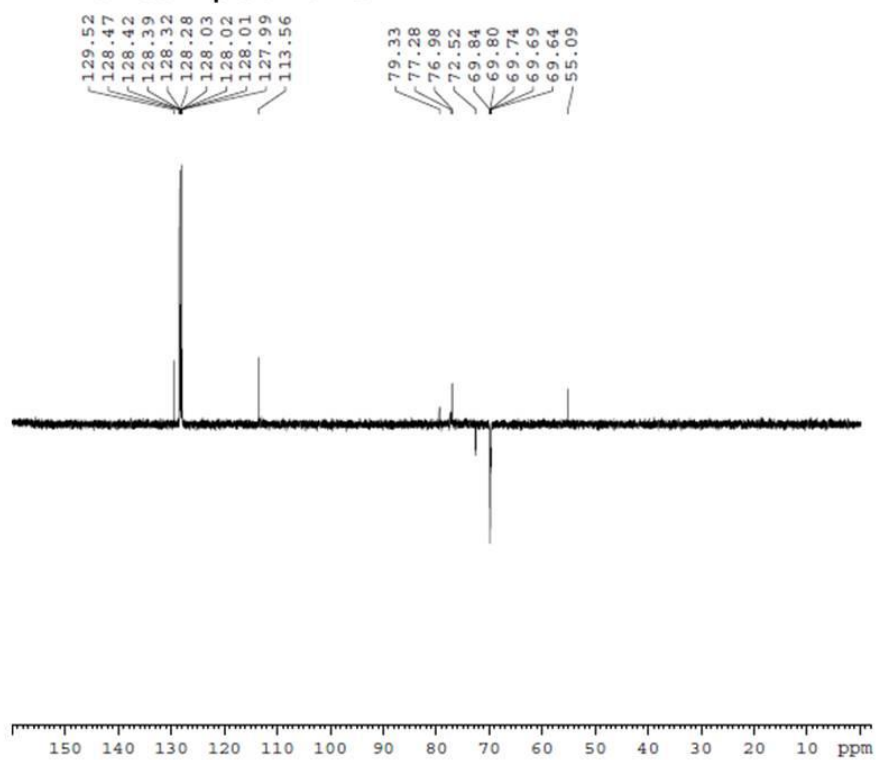

# $^{13}\text{C}$ of compound 15

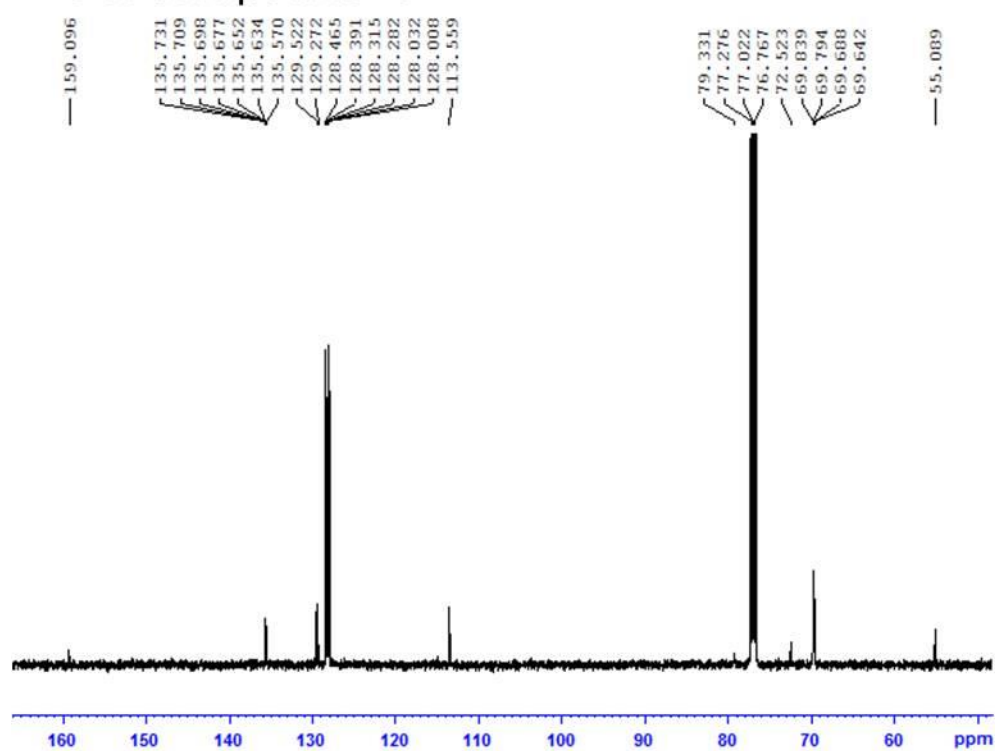

# HMQC of compound 15

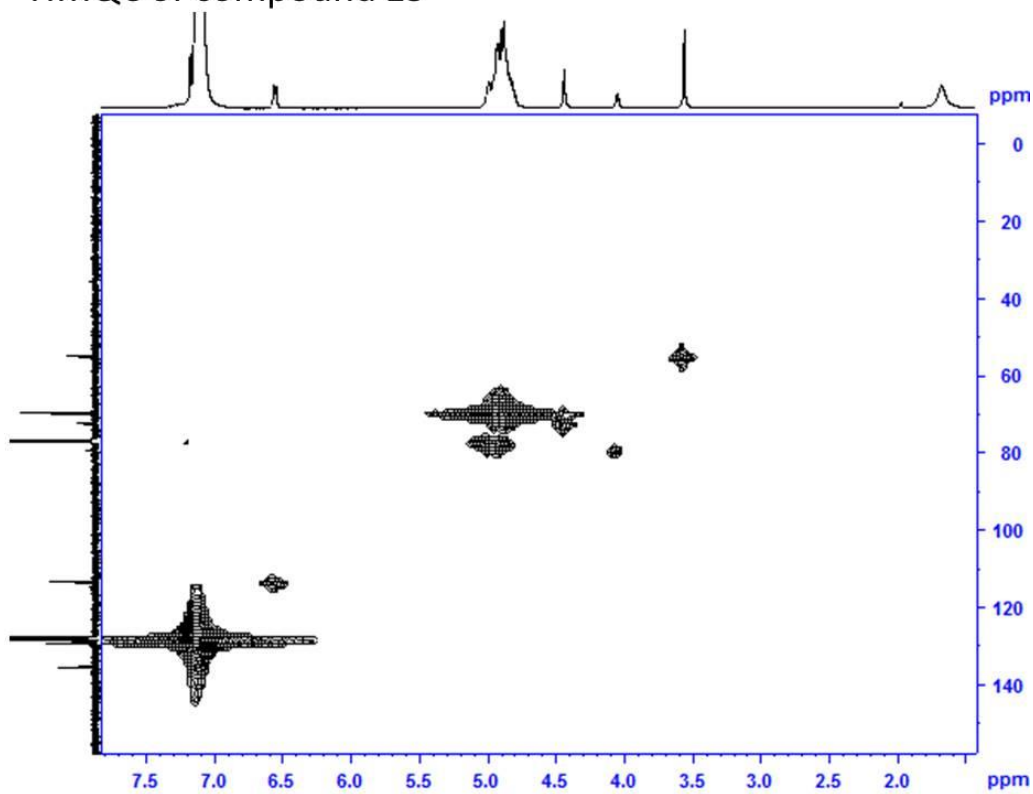

# <sup>31</sup>P of compound 15

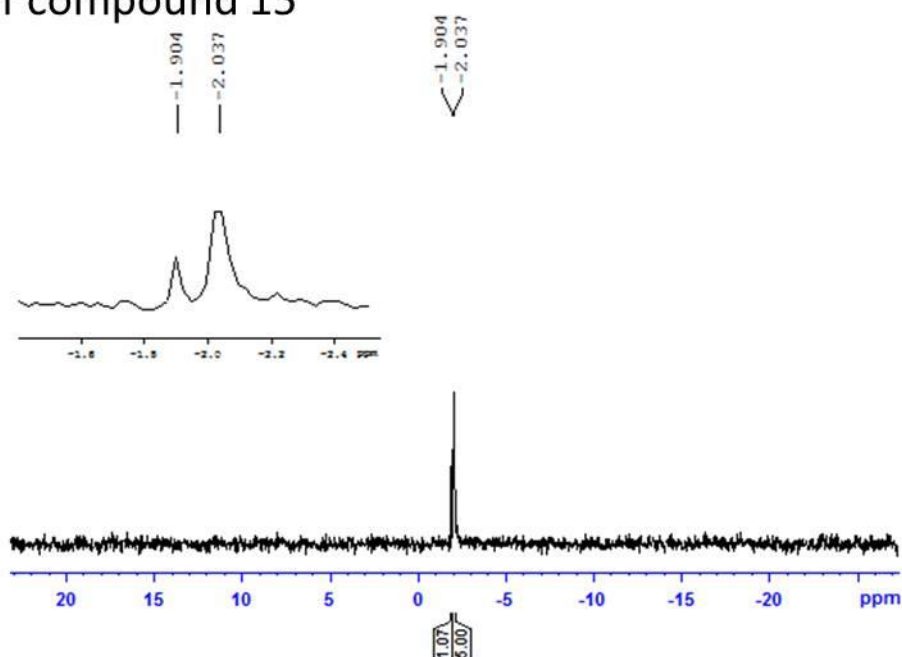

# <sup>1</sup>H NMR of compound 16

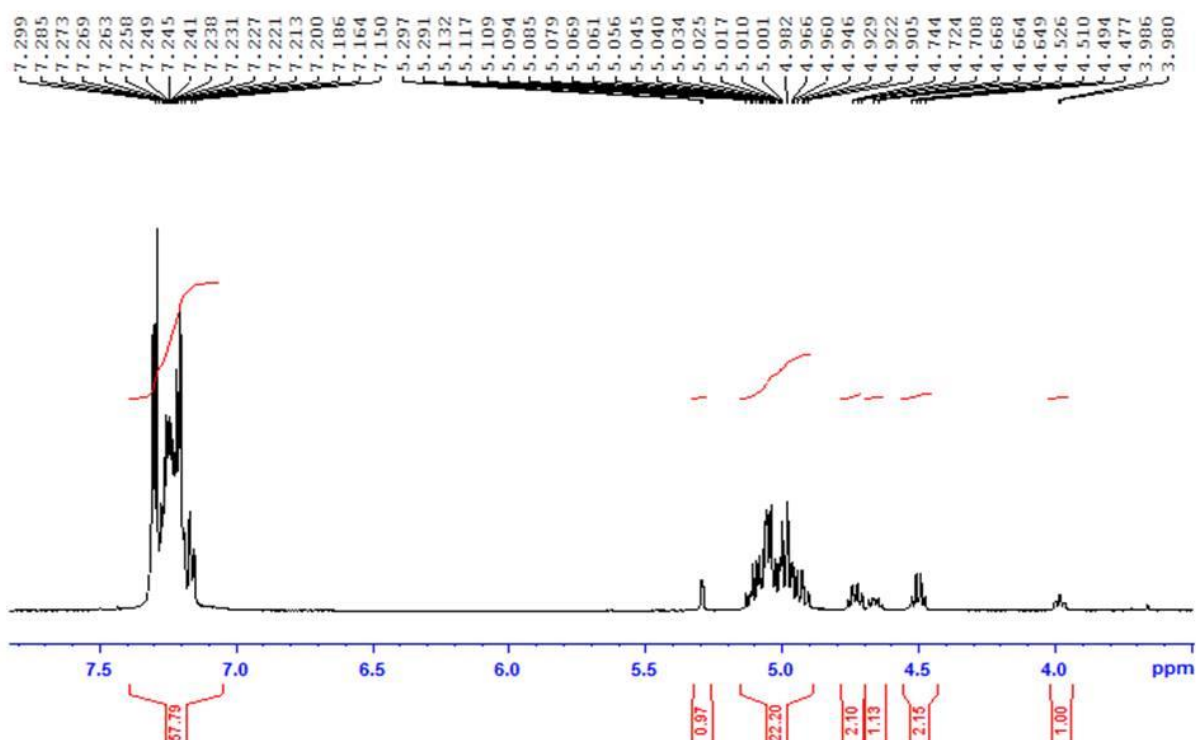



COSY of compound 16

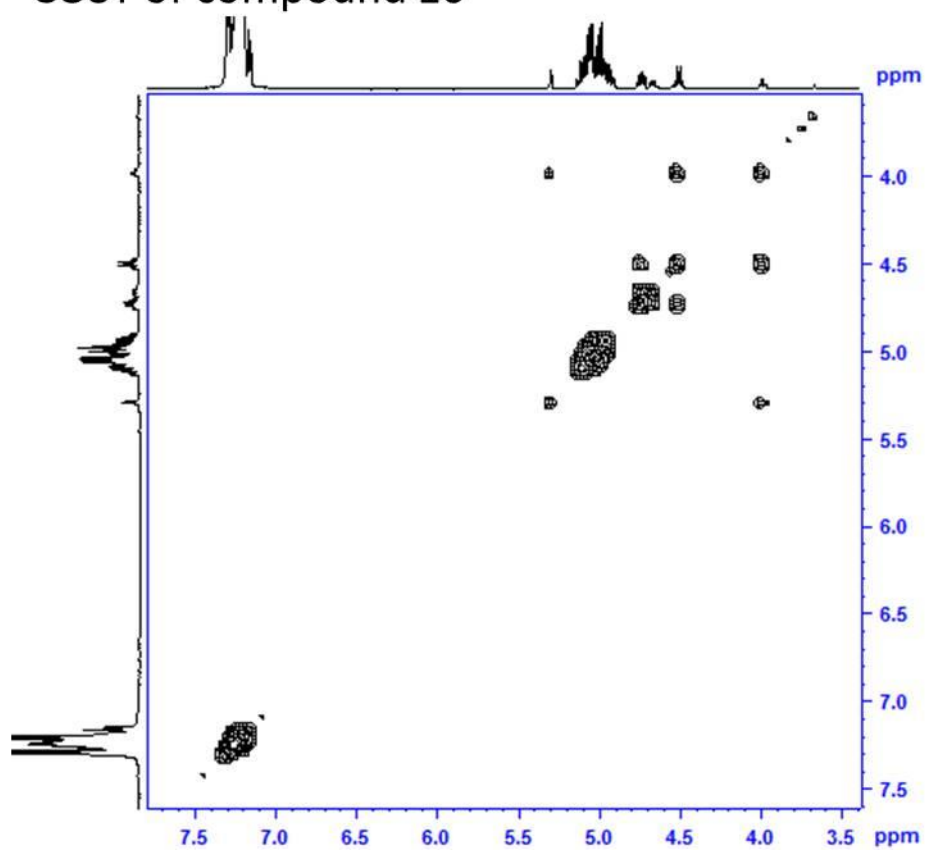

DEPT of compound 16

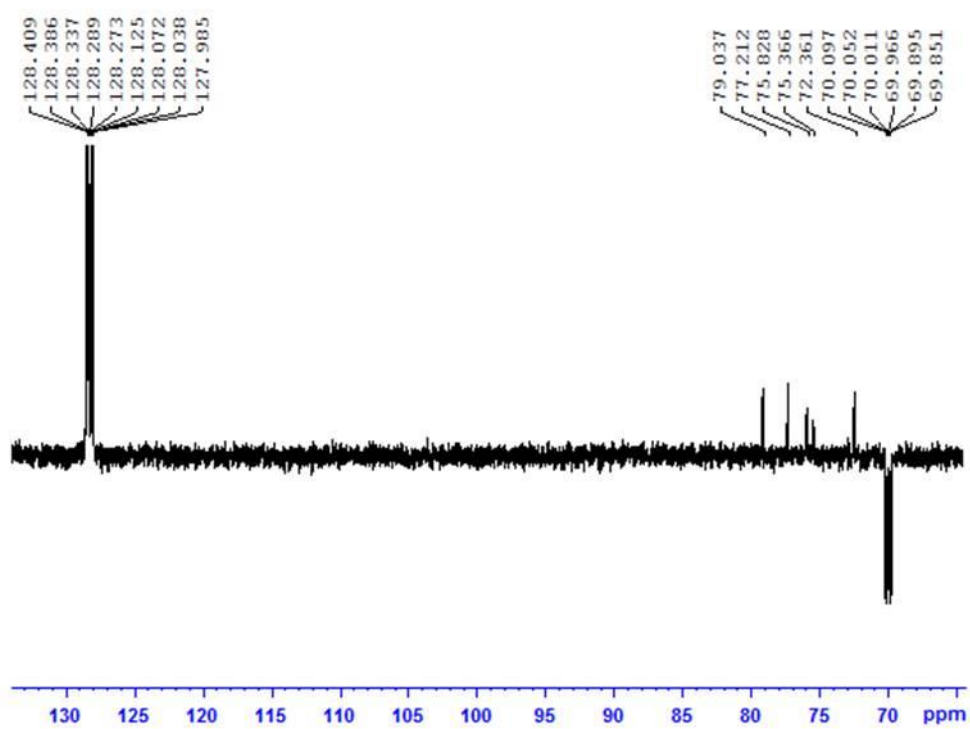

# <sup>13</sup>C of compound 16

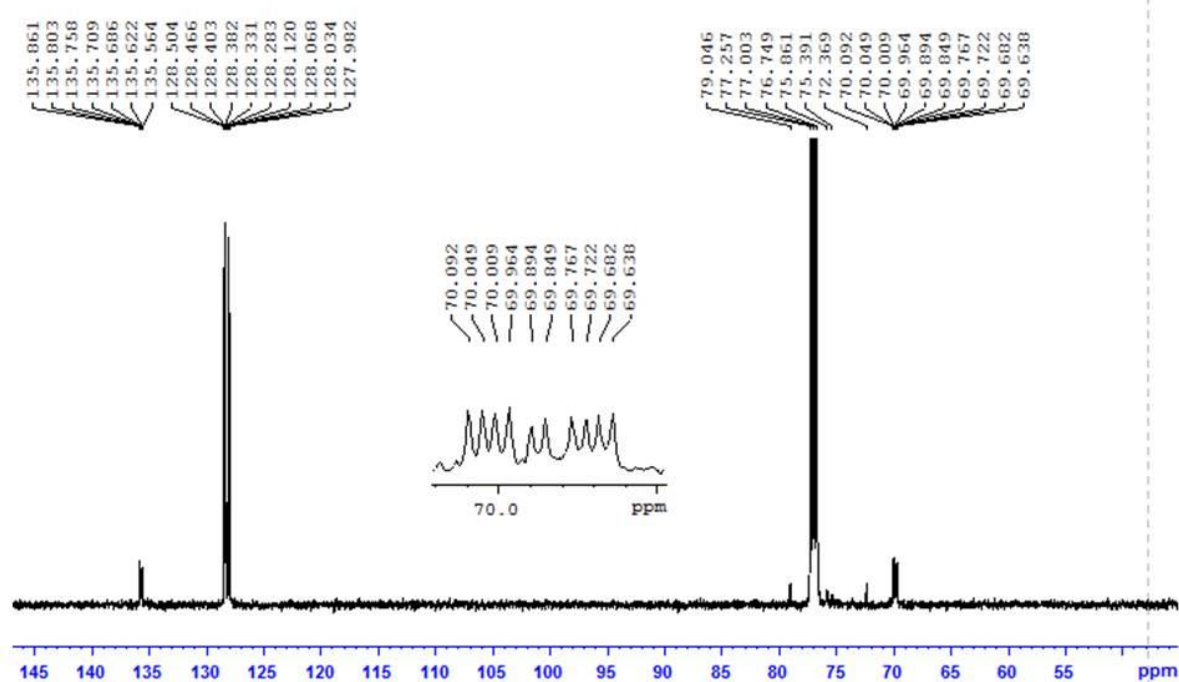

# HMQC of compound 16

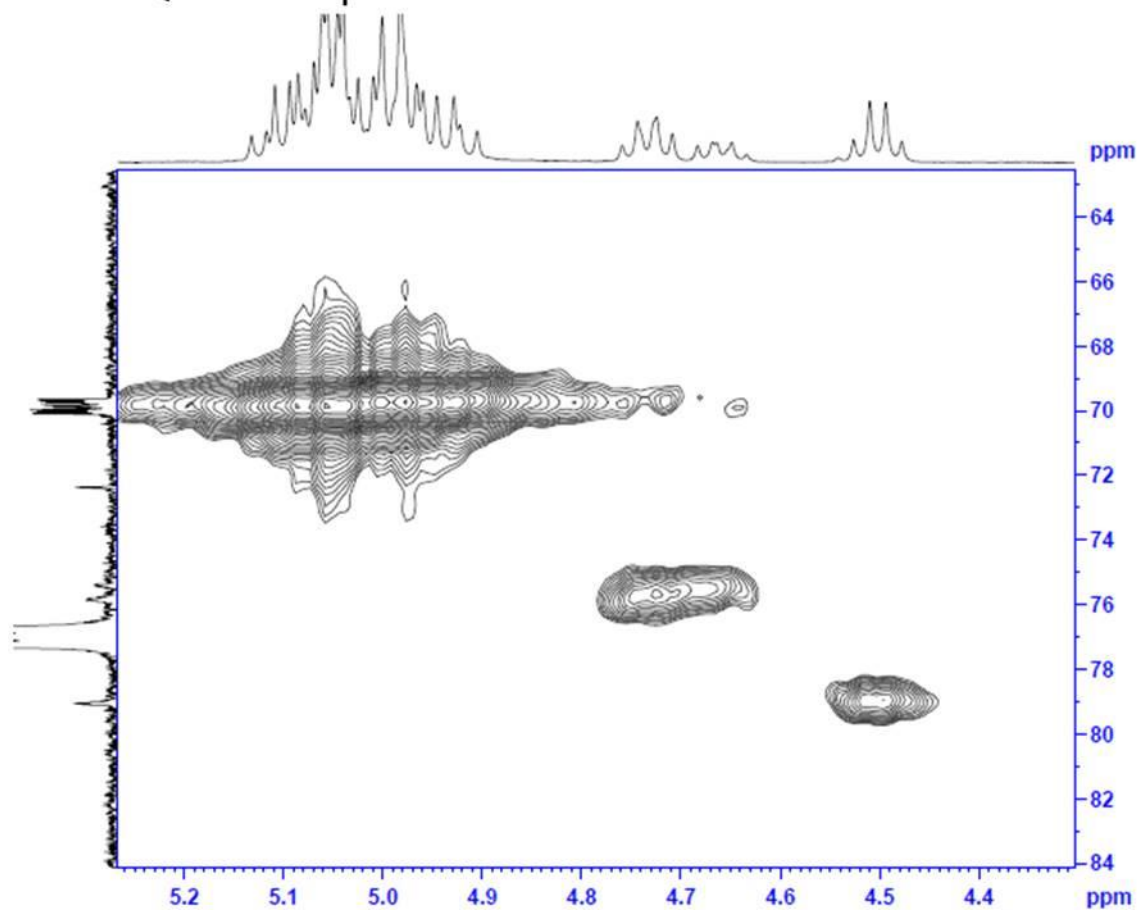

# $^{31}\text{P}$ of compound 16

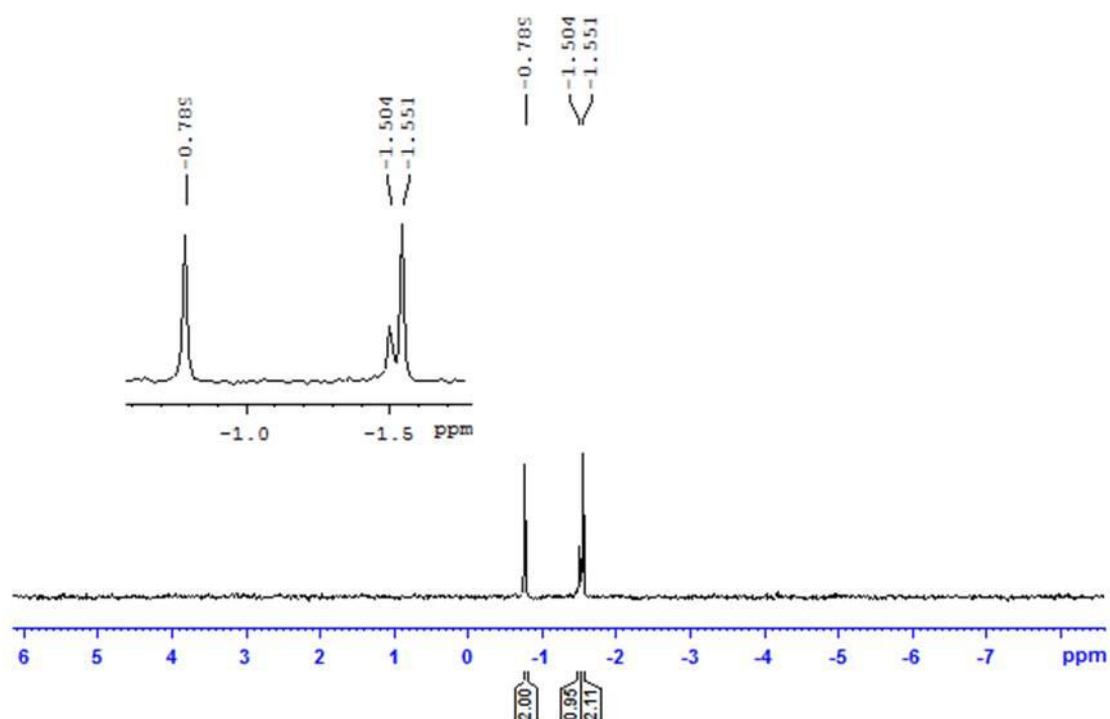

# $^1\text{H}$ NMR of compound 17

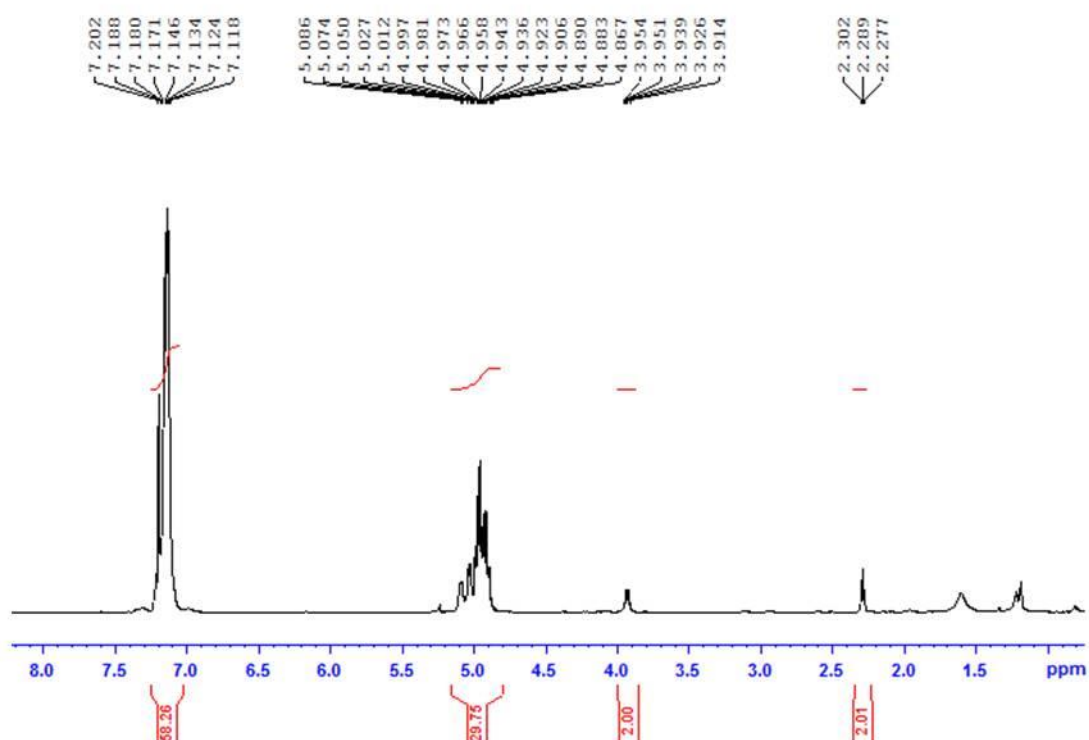

COSY of compound 17

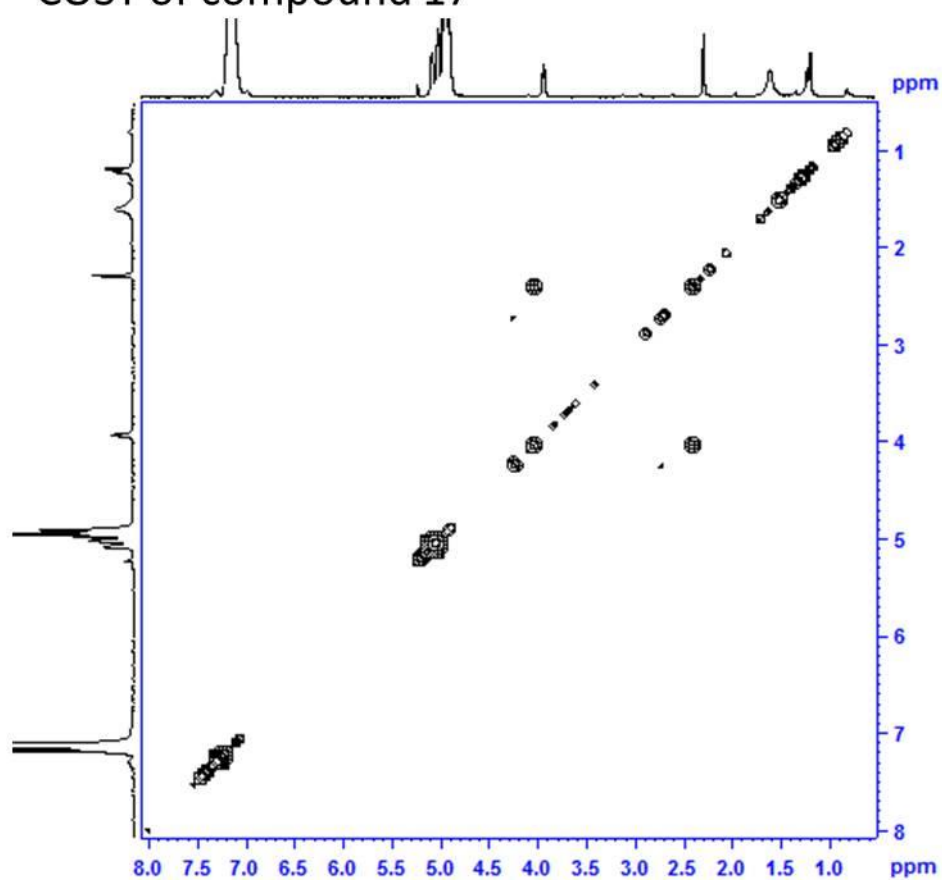

DEPT of compound 17

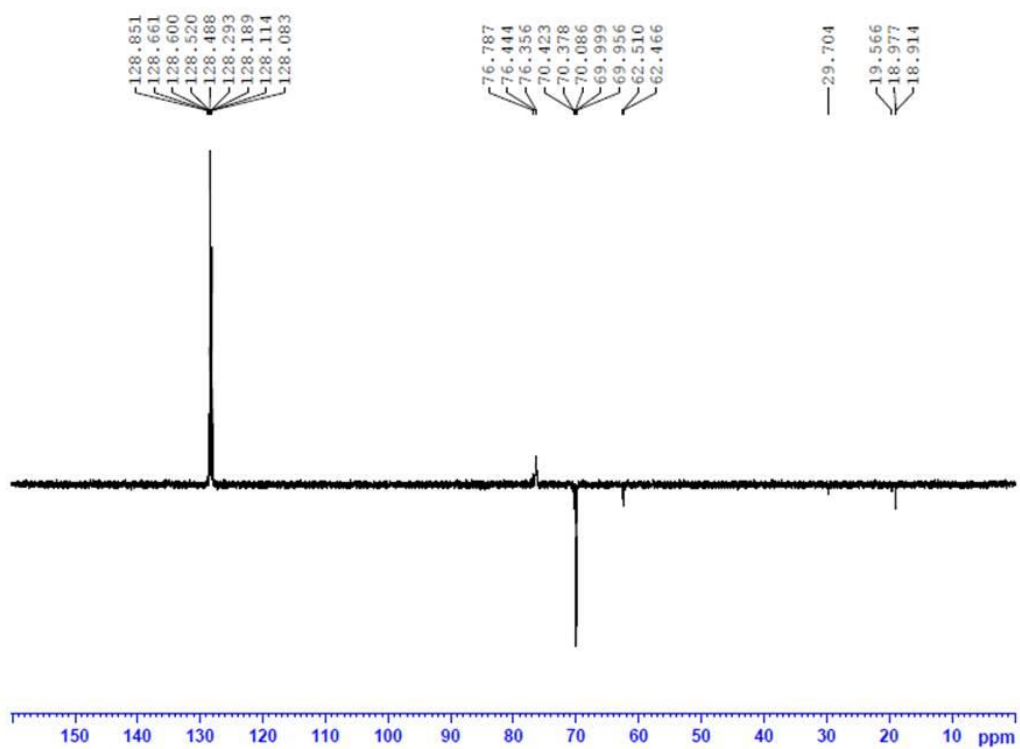

# <sup>13</sup>C of compound 17

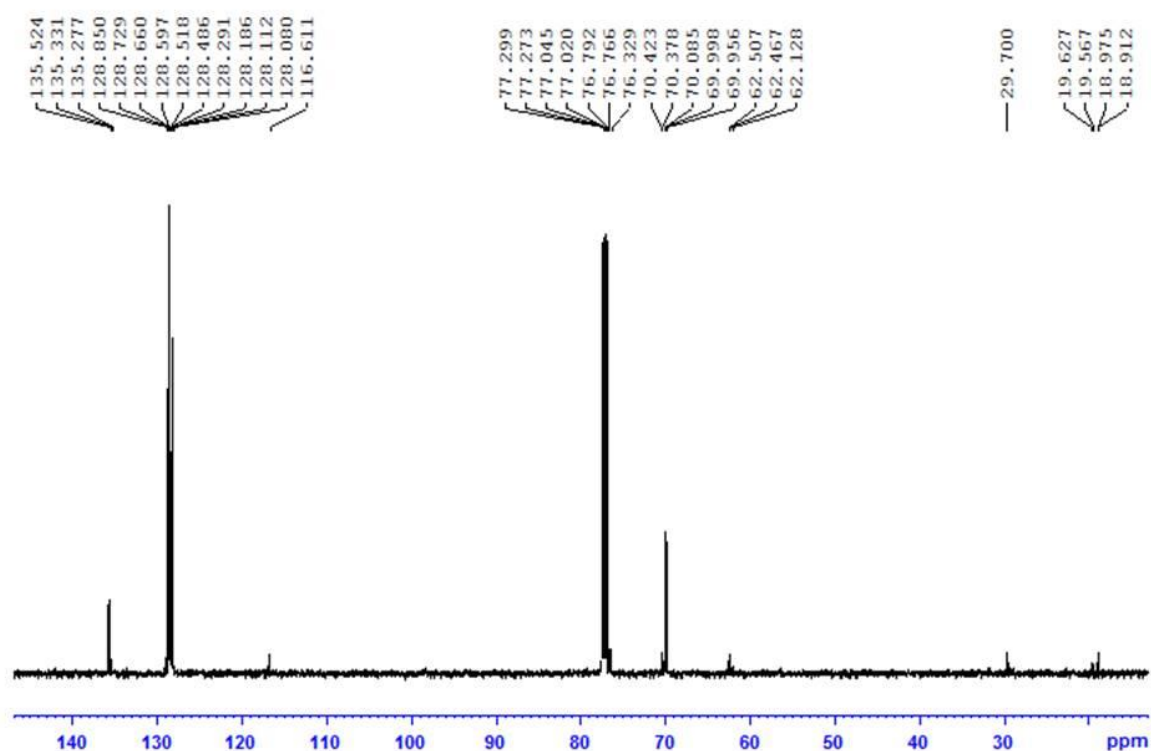

## HMQC of compound 17

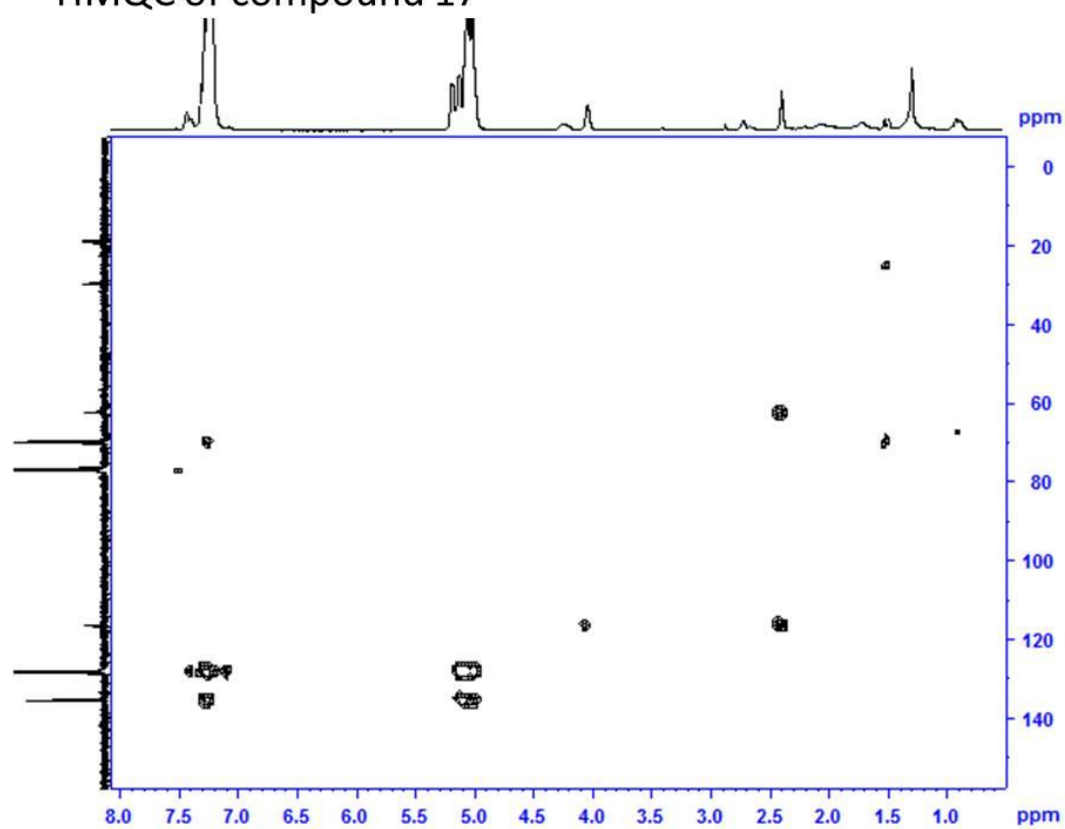

# <sup>31</sup>P of compound 17

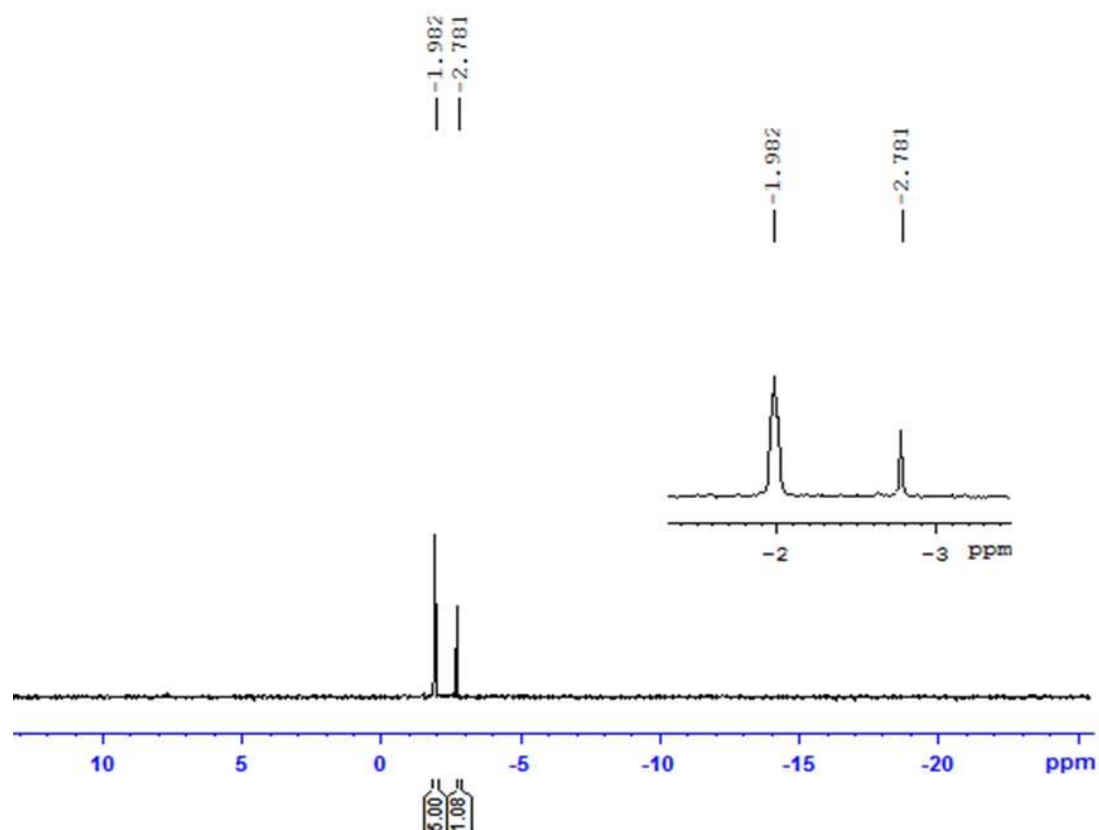

# <sup>1</sup>H of compound 18

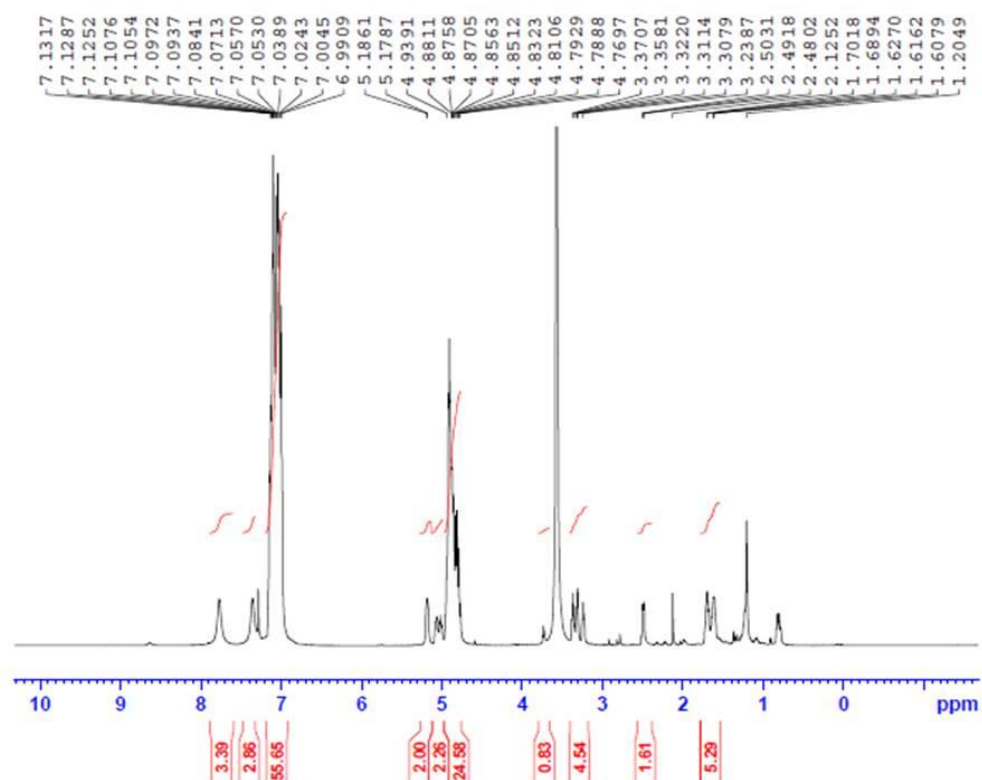

# COSY of compound 18

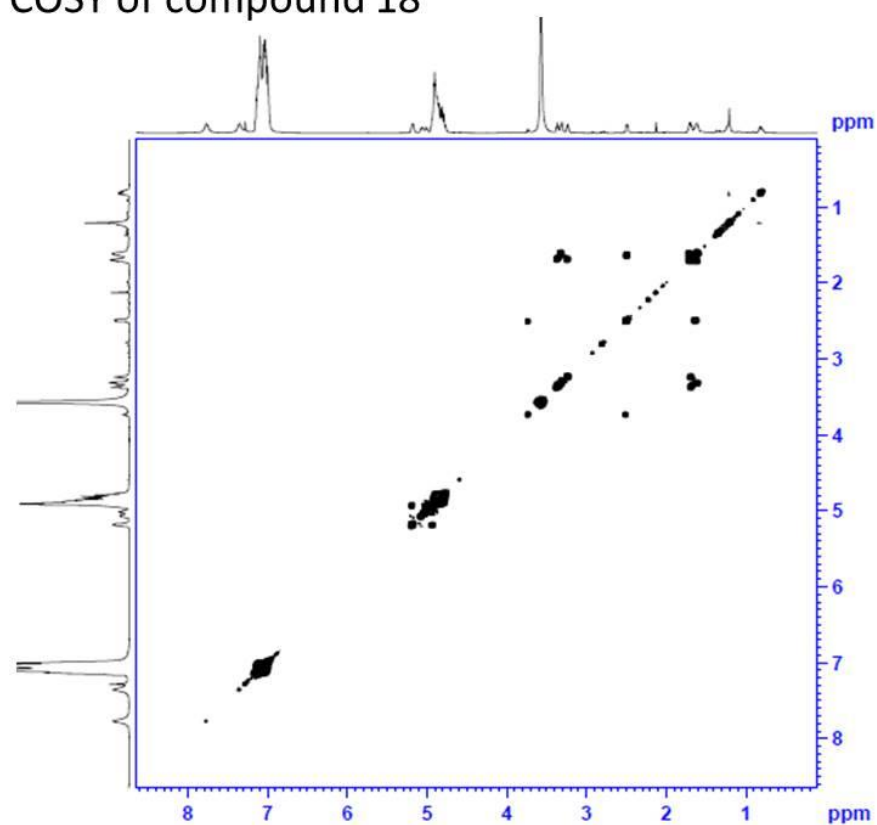

# DEPT of compound 18

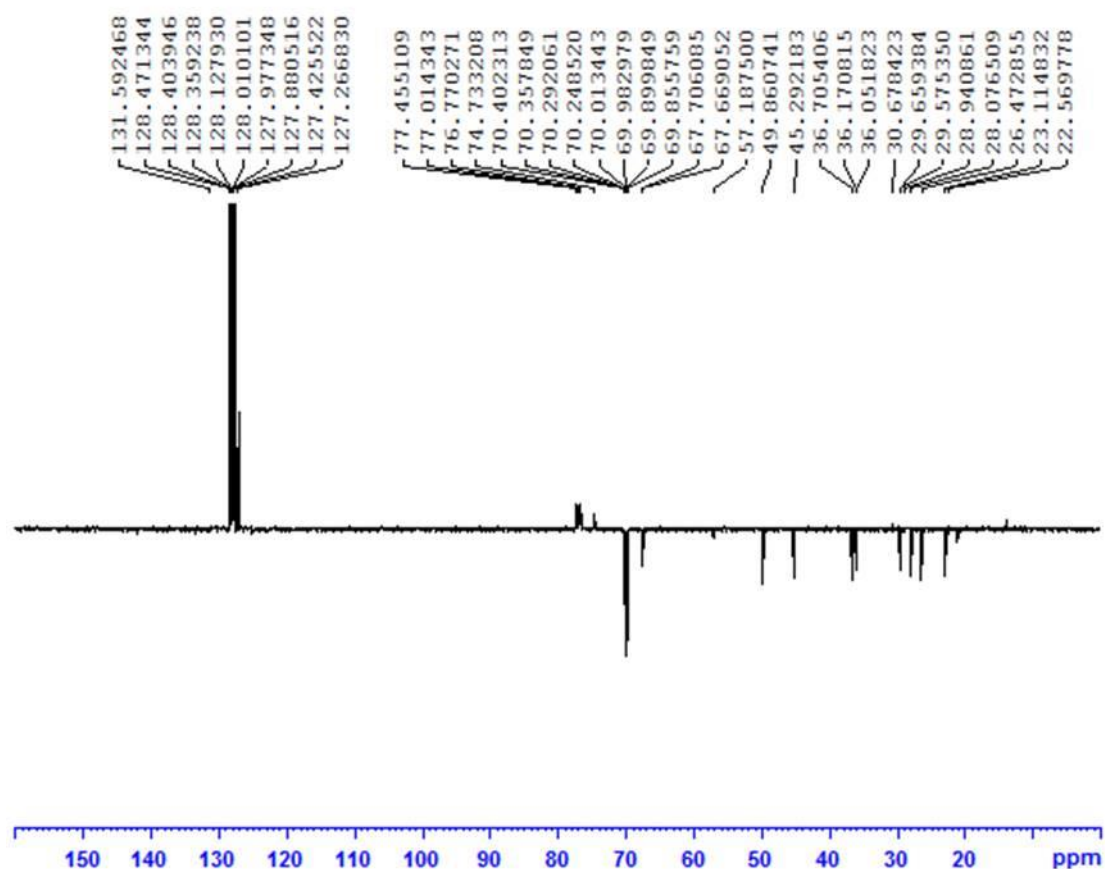



# <sup>13</sup>C of compound 18

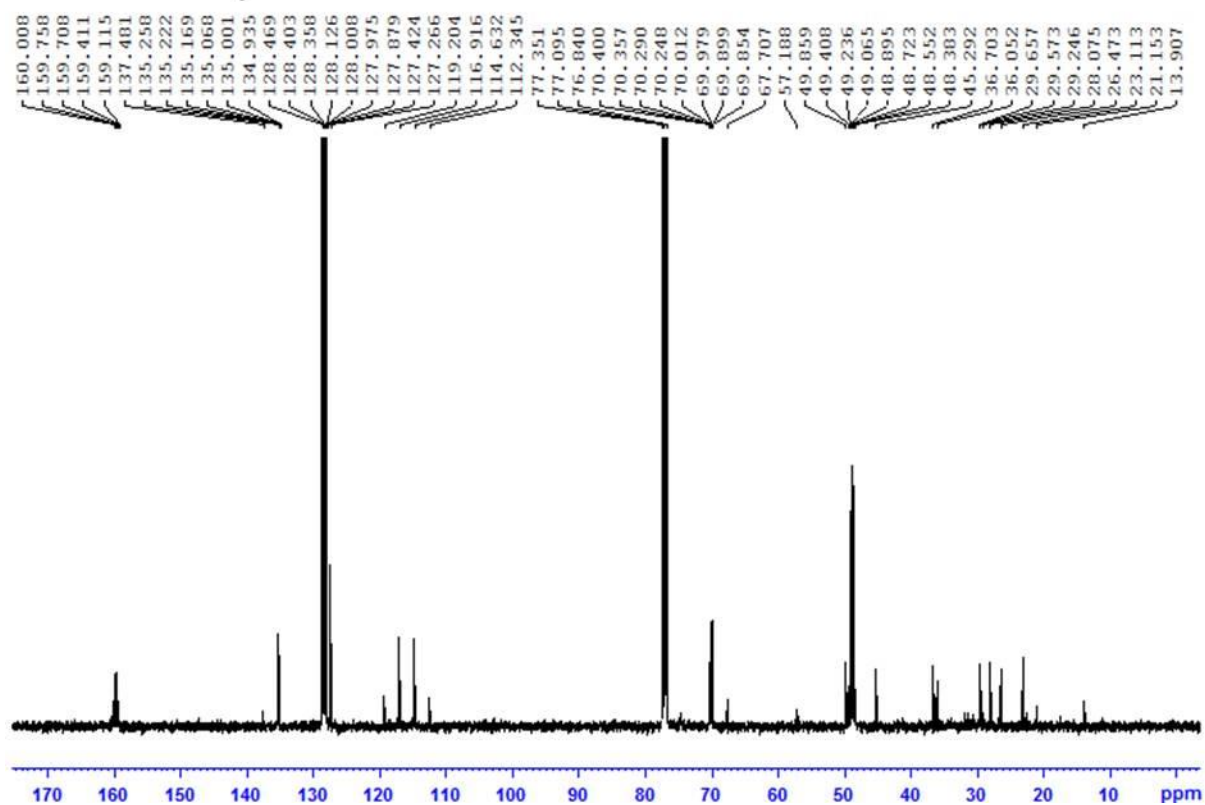

## HMQC of compound 18

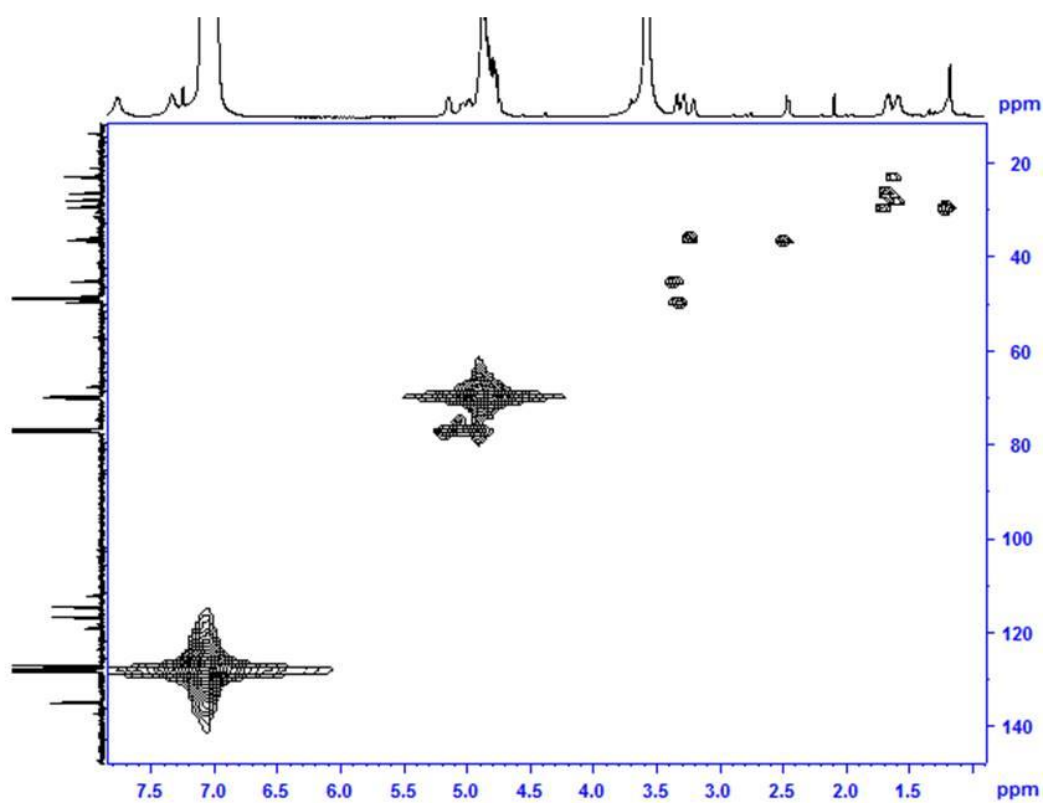



$^{31}\text{P}$  of compound 18

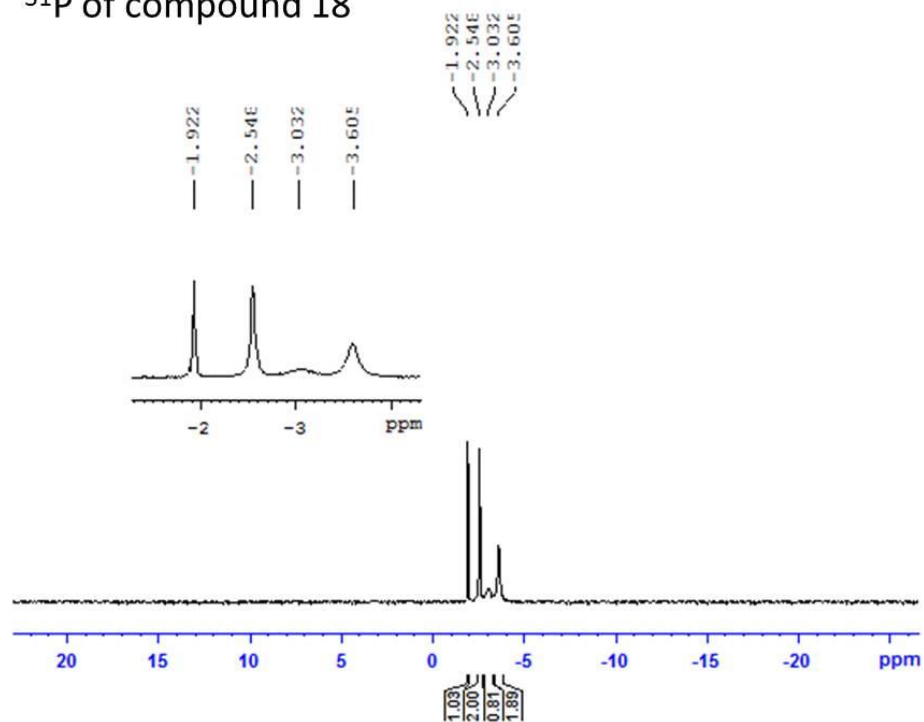

$^1\text{H}$  of compound 20

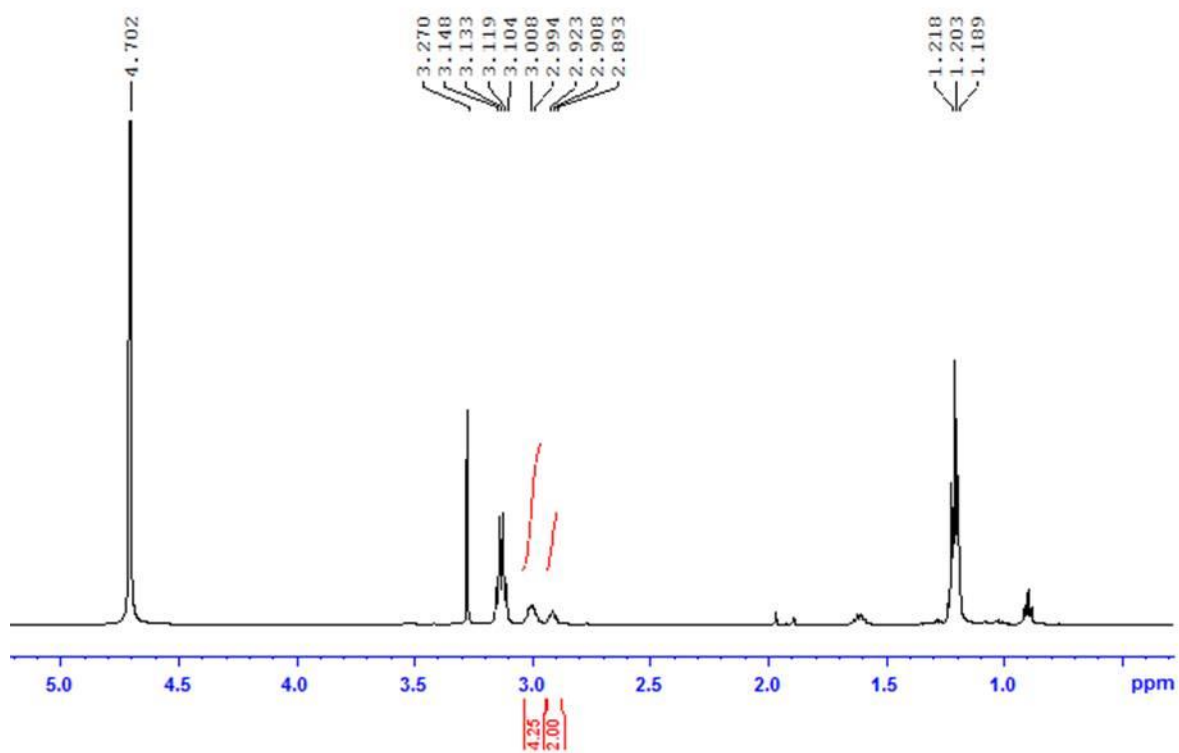

# $^{31}\text{P}$ of compound 20

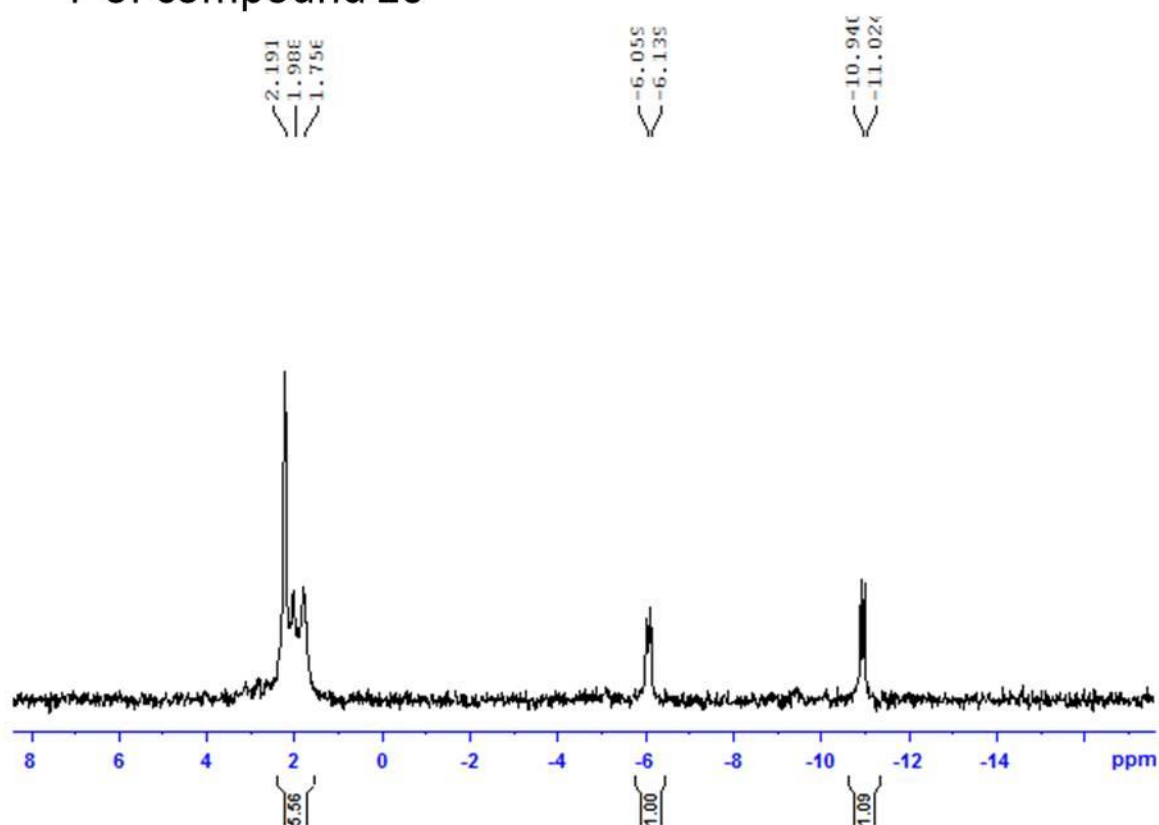

## HRMS spectra of compound 20

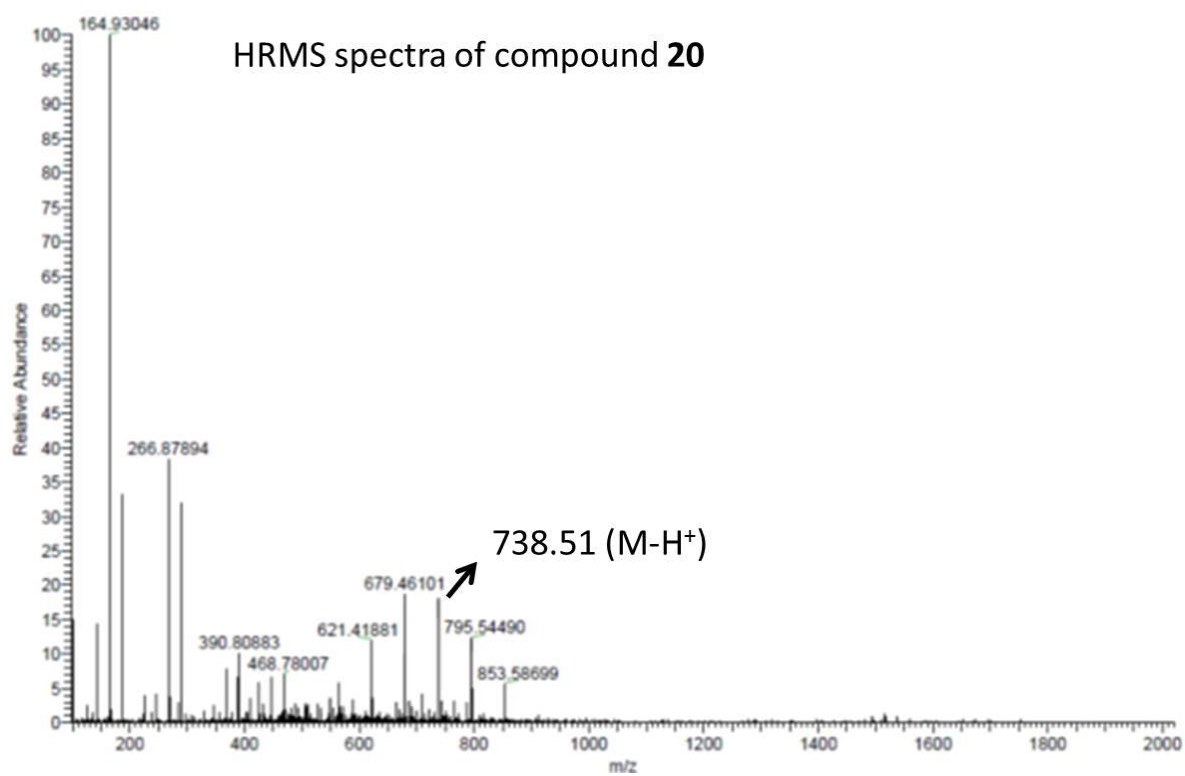

## References

1. Losito, O.; Szijgyarto, Z.; Resnick, A.C.; Saiardi, A. Inositol Pyrophosphates and Their Unique Metabolic Complexity: Analysis by Gel Electrophoresis. *PLoS ONE* **2009**, *4*, e5580, doi:10.1371/journal.pone.0005580.
2. Azevedo, C.; Saiardi, A. Extraction and analysis of soluble inositol polyphosphates from yeast. *Nat. Protoc.* **2006**, *1*, 2416–2422, doi:10.1038/nprot.2006.337.
3. Onnebo, S.M.N.; Saiardi, A. Inositol pyrophosphates modulate hydrogen peroxide signalling. *Biochem. J.* **2009**, *423*, 109–118, doi:10.1042/bj20090241.
4. Jones, G.; Willett, P.; Glen, R.C.; Leach, A.R.; Taylor, R. Development and validation of a genetic algorithm for flexible docking. *J. Mol. Biol.*, **1997**, *267*, 727–748, doi.org/10.1006/jmbi.1996.0897.
5. GaussView, Version 6.1, Dennington, R.; Keith, T. A.; Millam, J. M. Semichem Inc., Shawnee Mission, KS, 2016.
6. Avogadro: an open-source molecular builder and visualization tool. Version 1.2.0. Available online: <http://avogadro.cc/> (Accessed on 11 June 2021)
7. Riley, A.M.; Unterlass, J.; Konieczny, V.; Taylor, C.W.; Helleday, T.; Potter, B.V.L. A synthetic diphosphoinositol phosphate analogue of inositol trisphosphate. *MedChemComm* **2018**, *9*, 1105–1113, doi:10.1039/c8md00149a.
8. Salentin, S.; Schreiber, S.; Haupt, V.J.; Adasme, M.F.; Schroeder, M. PLIP: fully automated protein–ligand interaction profiler. *Nucleic Acids Res.* **2015**, *43*, W443–W447, doi:10.1093/nar/gkv315.
